# Supplementary material for: Energy requirements for pregnant dairy cows
Source: PubMed Central journal article supplement (PMC7340303; doi:10.1371/journal.pone.0235619), 2020-07-07
Supplement: pone.0235619.s002.pdf [file pone.0235619.s002.pdf]

# TODAS PRENHES TESTANDO DIETAS

## The NLMIXED Procedure

| Specifications                      |                   |
|-------------------------------------|-------------------|
| Data Set                            | WORK.IMPORT       |
| Dependent Variable                  | CTRET             |
| Distribution for Dependent Variable | Normal            |
| Optimization Technique              | Dual Quasi-Newton |
| Integration Method                  | None              |

| Dimensions            |    |
|-----------------------|----|
| Observations Used     | 42 |
| Observations Not Used | 14 |
| Total Observations    | 56 |
| Parameters            | 5  |

| Initial Parameters |      |      |      |      |                         |
|--------------------|------|------|------|------|-------------------------|
| a1                 | b1   | a2   | b2   | S2   | Negative Log Likelihood |
| 0.05               | 1.05 | 0.05 | 1.05 | 0.21 | 180.192729              |

| Iteration History |       |                         |            |                  |          |
|-------------------|-------|-------------------------|------------|------------------|----------|
| Iteration         | Calls | Negative Log Likelihood | Difference | Maximum Gradient | Slope    |
| 1                 | 7     | 137.0943                | 43.09844   | 1318.90          | -726430  |
| 2                 | 11    | 98.0169500              | 39.07734   | 294.345          | -21044.7 |
| 3                 | 13    | 81.6919290              | 16.32502   | 2487.06          | -1122.40 |
| 4                 | 17    | 61.3178859              | 20.37404   | 426.172          | -20.1378 |
| 5                 | 19    | 59.0393349              | 2.278551   | 507.269          | -6.39925 |
| 6                 | 22    | 57.5562425              | 1.483092   | 155.263          | -1.51583 |
| 7                 | 24    | 55.8671933              | 1.689049   | 107.243          | -0.85808 |
| 8                 | 27    | 55.7263640              | 0.140829   | 45.8212          | -0.43716 |
| 9                 | 29    | 55.5777096              | 0.148654   | 37.9049          | -0.19478 |
| 10                | 32    | 55.5074674              | 0.070242   | 23.6671          | -0.06518 |
| 11                | 34    | 55.4289013              | 0.078566   | 35.8151          | -0.04980 |
| 12                | 37    | 55.4109136              | 0.017988   | 16.6072          | -0.01709 |
| 13                | 40    | 55.4084834              | 0.00243    | 14.5478          | -0.00342 |
| 14                | 43    | 55.4079725              | 0.000511   | 3.47603          | -0.00052 |
| 15                | 46    | 55.4078084              | 0.000164   | 0.92525          | -0.00020 |
| 16                | 49    | 55.4077975              | 0.000011   | 0.038687         | -0.00001 |
| 17                | 52    | 55.4077973              | 1.807E-7   | 0.019494         | -2.74E-7 |

# TODAS PRENHES TESTANDO DIETAS

## The NLMIXED Procedure

NOTE: GCONV convergence criterion satisfied.

| Fit Statistics           |       |
|--------------------------|-------|
| -2 Log Likelihood        | 110.8 |
| AIC (smaller is better)  | 120.8 |
| AICC (smaller is better) | 122.5 |
| BIC (smaller is better)  | 129.5 |

| Parameter Estimates |          |                |    |         |         |                       |         |          |
|---------------------|----------|----------------|----|---------|---------|-----------------------|---------|----------|
| Parameter           | Estimate | Standard Error | DF | t Value | Pr >  t | 95% Confidence Limits |         | Gradient |
| a1                  | 0.06100  | 0.02599        | 42 | 2.35    | 0.0237  | 0.008550              | 0.1134  | 0.002597 |
| b1                  | 0.6818   | 0.2842         | 42 | 2.40    | 0.0210  | 0.1082                | 1.2553  | -0.00016 |
| a2                  | 0.06006  | 0.002131       | 42 | 28.18   | <.0001  | 0.05576               | 0.06436 | 0.019494 |
| b2                  | 0.6017   | 0.1438         | 42 | 4.18    | 0.0001  | 0.3115                | 0.8919  | 0.000057 |
| S2                  | 0.8192   | 0.1788         | 42 | 4.58    | <.0001  | 0.4584                | 1.1800  | 0.000094 |

| Correlation Matrix of Parameter Estimates |        |        |        |        |        |
|-------------------------------------------|--------|--------|--------|--------|--------|
|                                           | a1     | b1     | a2     | b2     | S2     |
| a1                                        | 1.0000 | 0.9606 | 0.0000 | 0.0000 | 0.0002 |
| b1                                        | 0.9606 | 1.0000 | 0.0000 | 0.0000 | 0.0002 |
| a2                                        | 0.0000 | 0.0000 | 1.0000 | 0.0752 | 0.0002 |
| b2                                        | 0.0000 | 0.0000 | 0.0752 | 1.0000 | 0.0000 |
| S2                                        | 0.0002 | 0.0002 | 0.0002 | 0.0000 | 1.0000 |

| Additional Estimates |          |                |    |         |         |       |          |         |
|----------------------|----------|----------------|----|---------|---------|-------|----------|---------|
| Label                | Estimate | Standard Error | DF | t Value | Pr >  t | Alpha | Lower    | Upper   |
| Va1-Pa2              | 0.000935 | 0.02608        | 42 | 0.04    | 0.9716  | 0.05  | -0.05169 | 0.05356 |
| Vb1-Pb2              | 0.08007  | 0.3185         | 42 | 0.25    | 0.8027  | 0.05  | -0.5627  | 0.7229  |

| Correlation Matrix of Additional Estimates |        |        |
|--------------------------------------------|--------|--------|
| Label                                      | Corr1  | Corr2  |
| Va1-Pa2                                    | 1.0000 | 0.8570 |
| Vb1-Pb2                                    | 0.8570 | 1.0000 |

### GANHO APENAS PRENHES

The NLIN Procedure  
 Dependent Variable CTRET  
 Method: Gauss-Newton

| Iterative Phase |        |        |                |
|-----------------|--------|--------|----------------|
| Iter            | a      | b      | Sum of Squares |
| 0               | 0.0860 | 1.0500 | 169.1          |
| 1               | 0.0604 | 0.6979 | 34.8308        |
| 2               | 0.0600 | 0.6544 | 34.5556        |
| 3               | 0.0600 | 0.6562 | 34.5551        |
| 4               | 0.0600 | 0.6562 | 34.5551        |

Note: Missing values were generated as a result of performing an operation on missing values. Each place is given by (number of times) AT (statement)/(line):(column).

14 AT 1/96:25

NOTE: Convergence criterion met.

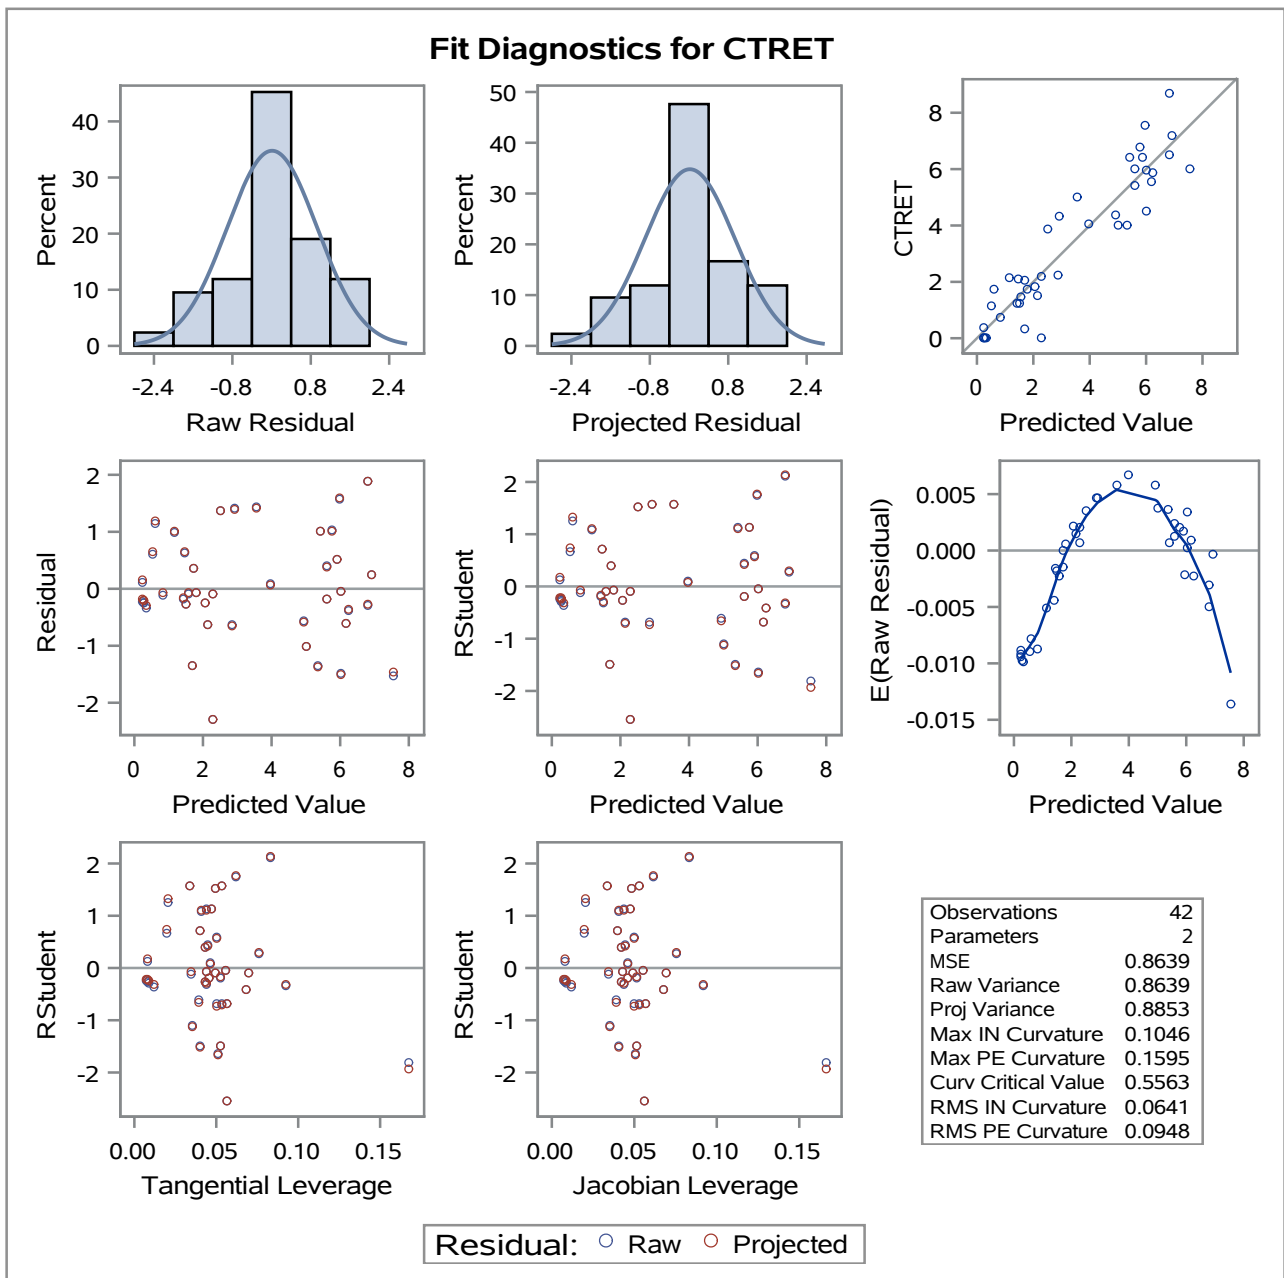

# GANHO APENAS PRENHES

The NLIN Procedure  
 Dependent Variable CTRET  
 Method: Gauss-Newton

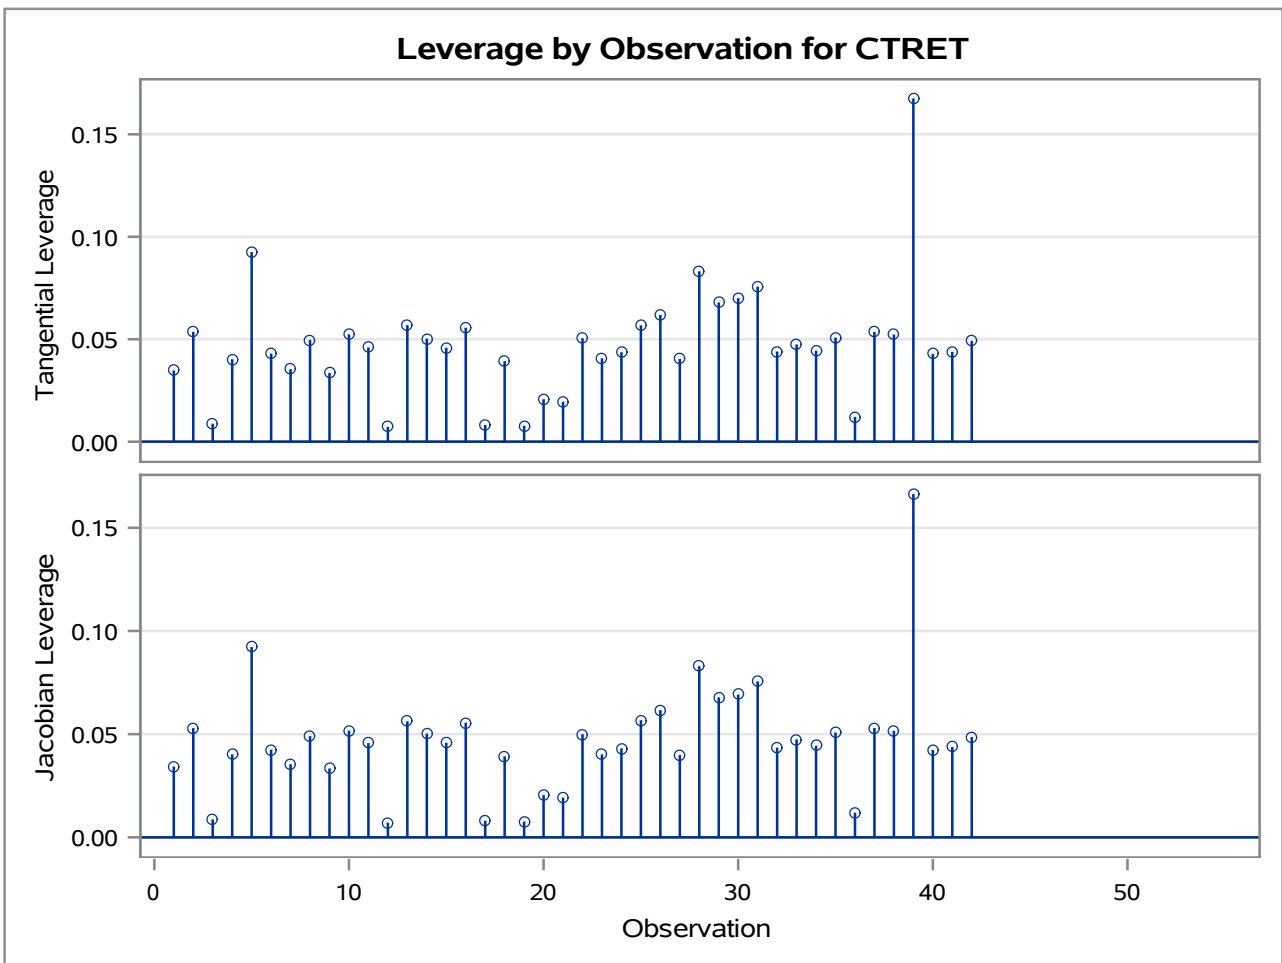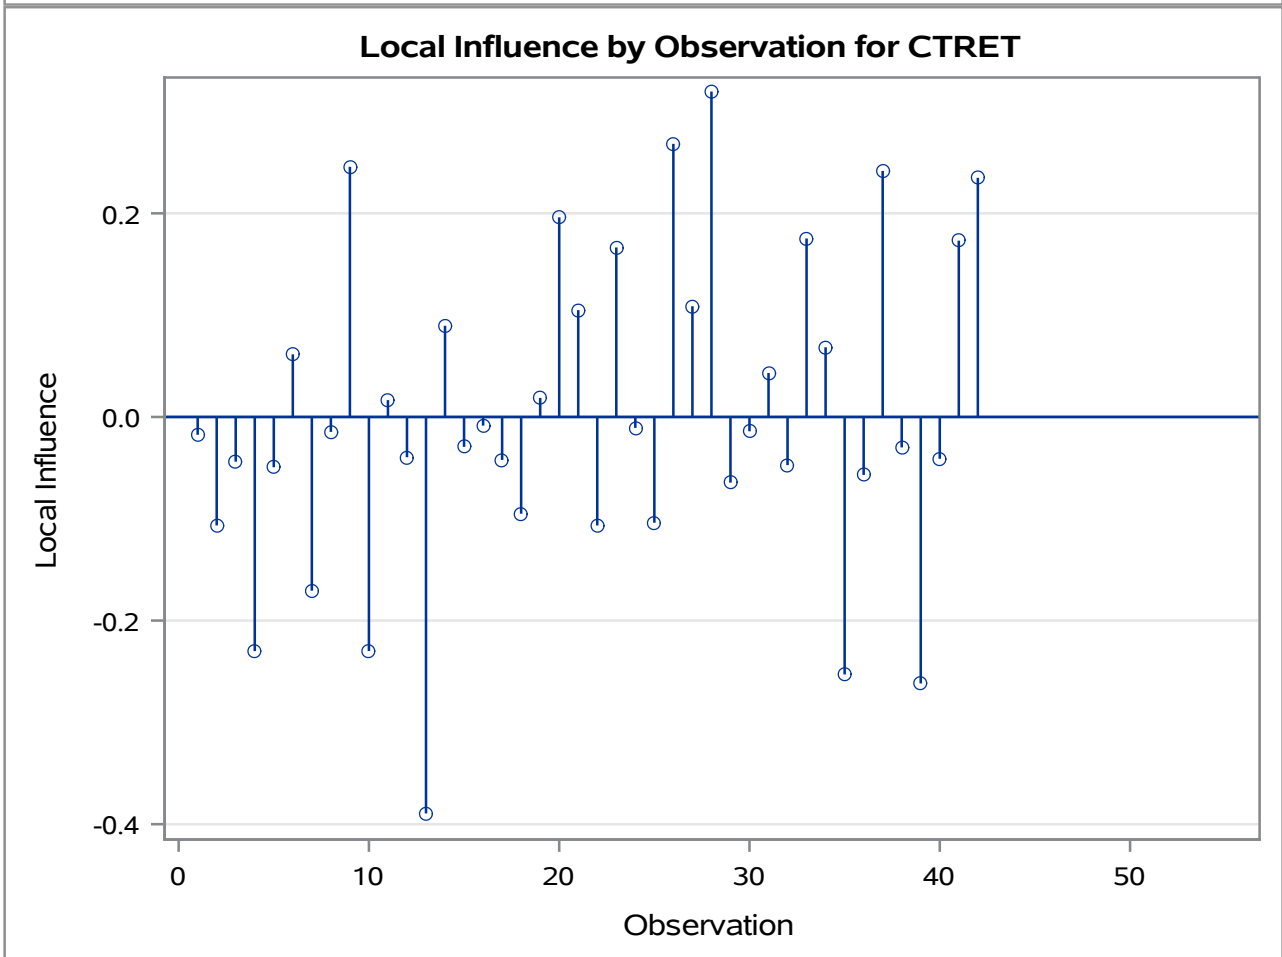

# GANHO APENAS PRENHES

## The NLIN Procedure

| Estimation Summary   |              |
|----------------------|--------------|
| Method               | Gauss-Newton |
| Iterations           | 4            |
| R                    | 6.051E-7     |
| PPC(b)               | 4.228E-7     |
| RPC(b)               | 0.000032     |
| Object               | 2.03E-9      |
| Objective            | 34.55506     |
| Observations Read    | 56           |
| Observations Used    | 42           |
| Observations Missing | 14           |

**Note:** An intercept was not specified for this model.

| Source            | DF | Sum of Squares | Mean Square | F Value | Approx Pr > F |
|-------------------|----|----------------|-------------|---------|---------------|
| Model             | 2  | 712.7          | 356.4       | 412.52  | <.0001        |
| Error             | 40 | 34.5551        | 0.8639      |         |               |
| Uncorrected Total | 42 | 747.3          |             |         |               |

| Parameter | Estimate | Approx Std Error | Approximate 95% Confidence Limits |        |
|-----------|----------|------------------|-----------------------------------|--------|
|           |          |                  |                                   |        |
| a         | 0.0600   | 0.00217          | 0.0556                            | 0.0644 |
| b         | 0.6562   | 0.0725           | 0.5097                            | 0.8027 |

| Approximate Correlation Matrix |           |           |
|--------------------------------|-----------|-----------|
|                                | a         | b         |
| a                              | 1.0000000 | 0.2712055 |
| b                              | 0.2712055 | 1.0000000 |

## GANHO APENAS PRENHES

**The REG Procedure**  
**Model: MODEL1**  
**Dependent Variable: Pred Predicted Value**

|                                            |    |
|--------------------------------------------|----|
| Number of Observations Read                | 56 |
| Number of Observations Used                | 42 |
| Number of Observations with Missing Values | 14 |

| Analysis of Variance |    |                |             |         |        |
|----------------------|----|----------------|-------------|---------|--------|
| Source               | DF | Sum of Squares | Mean Square | F Value | Pr > F |
| Model                | 1  | 202.07130      | 202.07130   | 264.76  | <.0001 |
| Error                | 40 | 30.52947       | 0.76324     |         |        |
| Corrected Total      | 41 | 232.60077      |             |         |        |

|                |          |          |        |
|----------------|----------|----------|--------|
| Root MSE       | 0.87363  | R-Square | 0.8687 |
| Dependent Mean | 3.38163  | Adj R-Sq | 0.8655 |
| Coeff Var      | 25.83474 |          |        |

| Parameter Estimates |           |    |                    |                |         |         |
|---------------------|-----------|----|--------------------|----------------|---------|---------|
| Variable            | Label     | DF | Parameter Estimate | Standard Error | t Value | Pr >  t |
| Intercept           | Intercept | 1  | 0.39479            | 0.22775        | 1.73    | 0.0907  |
| CTRET               | CTRET     | 1  | 0.87852            | 0.05399        | 16.27   | <.0001  |

# GANHO APENAS PRENHES

The REG Procedure  
 Model: MODEL1  
 Dependent Variable: Pred Predicted Value

## Fit Diagnostics for Pred

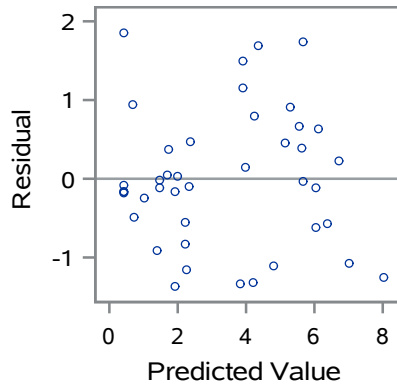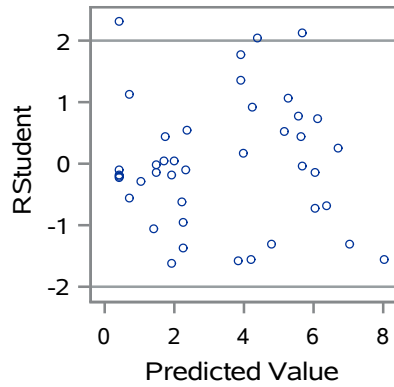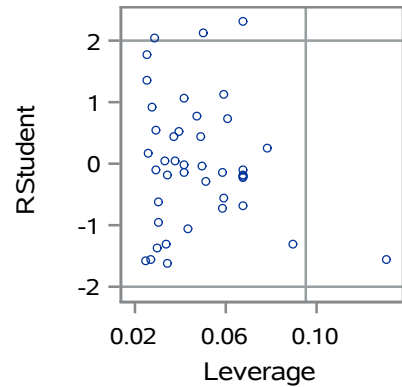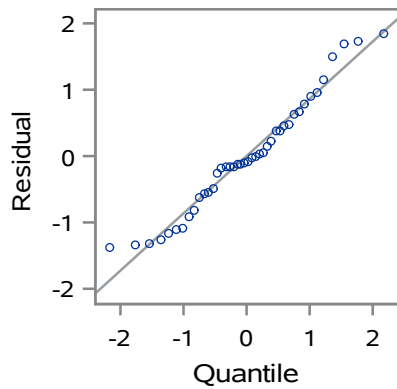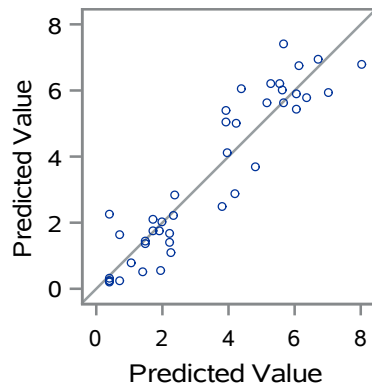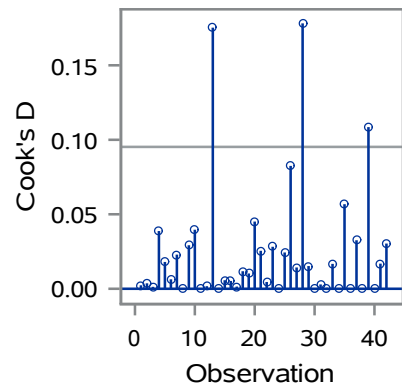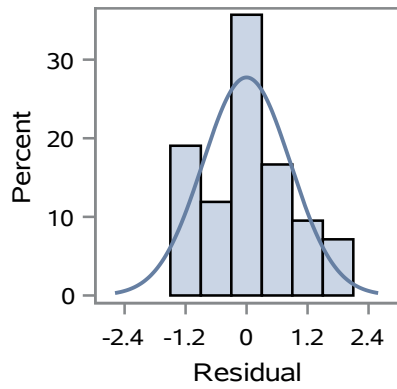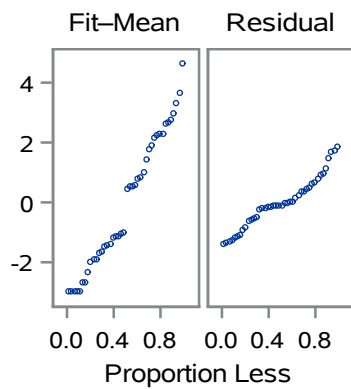

|              |        |
|--------------|--------|
| Observations | 42     |
| Parameters   | 2      |
| Error DF     | 40     |
| MSE          | 0.7632 |
| R-Square     | 0.8687 |
| Adj R-Square | 0.8655 |

# GANHO APENAS PRENHES

The REG Procedure  
 Model: MODEL1  
 Dependent Variable: Pred Predicted Value

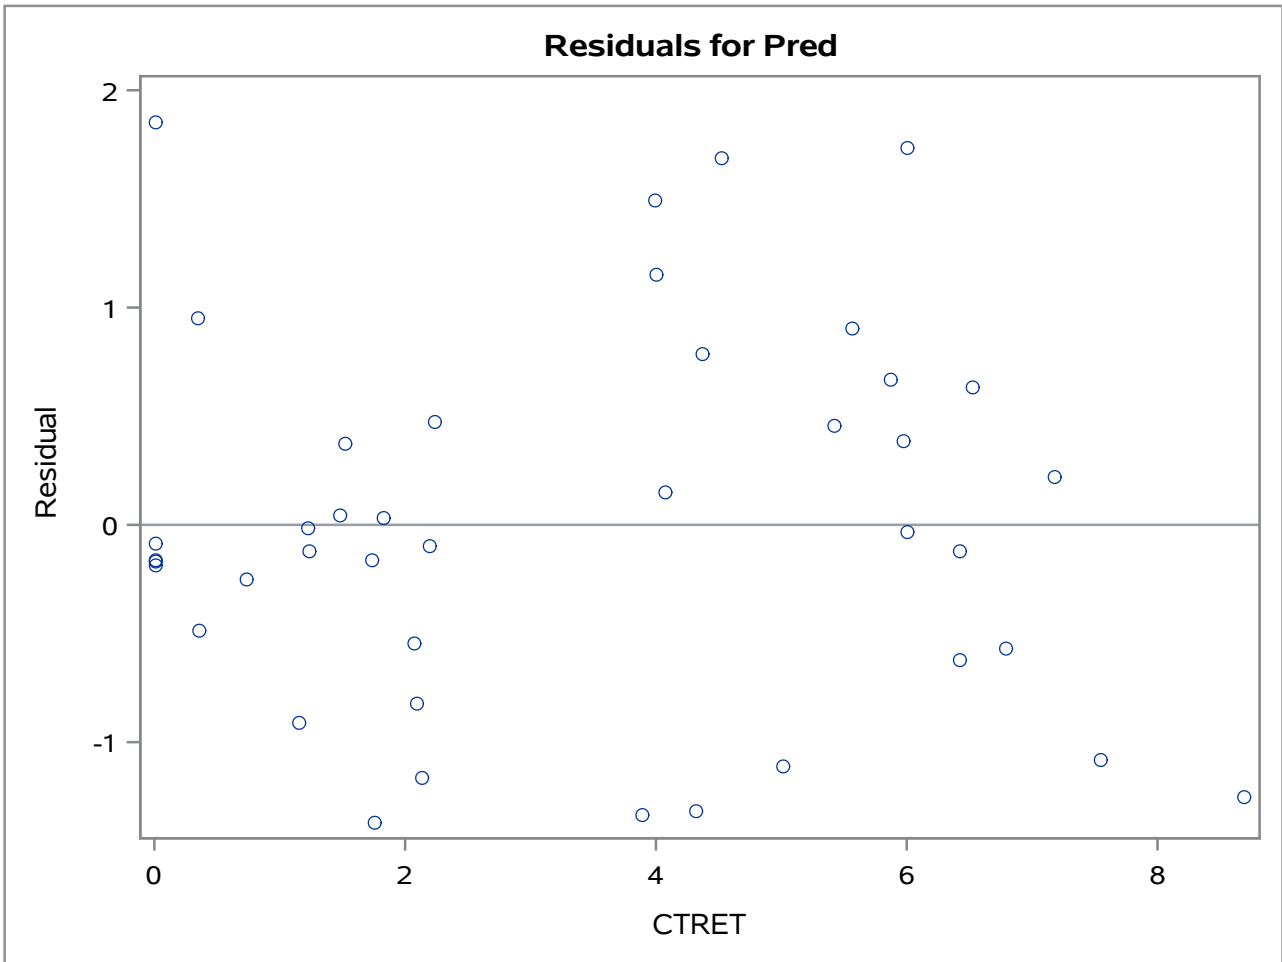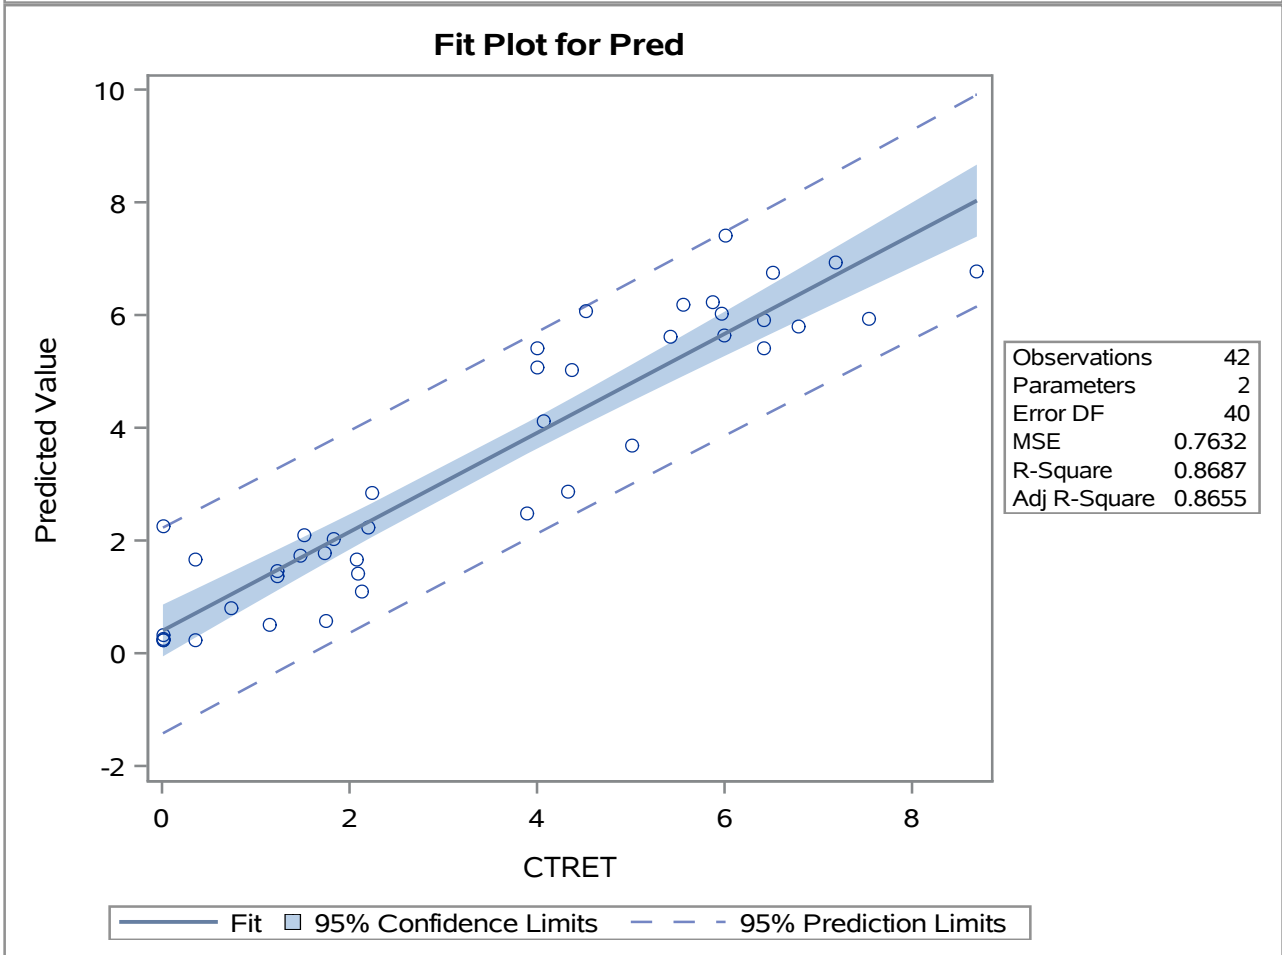



**GANHO APENAS PRENHES****The MEANS Procedure**

| Analysis Variable : MSE |           |           |             |           |
|-------------------------|-----------|-----------|-------------|-----------|
| N                       | Mean      | Std Dev   | Minimum     | Maximum   |
| 42                      | 0.8192135 | 1.1312515 | 0.000499209 | 5.0486955 |
