# Supplementary material for: Energy requirements for pregnant dairy cows
Source: PubMed Central journal article supplement (PMC7340303; doi:10.1371/journal.pone.0235619), 2020-07-07
Supplement: pone.0235619.s003.pdf [file pone.0235619.s003.pdf]

### The Mixed Procedure

| Model Information         |             |
|---------------------------|-------------|
| Data Set                  | WORK.NEW    |
| Dependent Variable        | ER_UTM_dia  |
| Covariance Structure      | Diagonal    |
| Estimation Method         | REML        |
| Residual Variance Method  | Profile     |
| Fixed Effects SE Method   | Model-Based |
| Degrees of Freedom Method | Residual    |

| Dimensions            |    |
|-----------------------|----|
| Covariance Parameters | 1  |
| Columns in X          | 2  |
| Columns in Z          | 0  |
| Subjects              | 1  |
| Max Obs per Subject   | 11 |

| Number of Observations          |    |
|---------------------------------|----|
| Number of Observations Read     | 26 |
| Number of Observations Used     | 11 |
| Number of Observations Not Used | 15 |

| Covariance Parameter Estimates |          |                |         |        |
|--------------------------------|----------|----------------|---------|--------|
| Cov Parm                       | Estimate | Standard Error | Z Value | Pr > Z |
| Residual                       | 0.000095 | 0.000045       | 2.12    | 0.0169 |

| Fit Statistics           |       |
|--------------------------|-------|
| -2 Res Log Likelihood    | -58.9 |
| AIC (Smaller is Better)  | -56.9 |
| AICC (Smaller is Better) | -56.3 |
| BIC (Smaller is Better)  | -56.7 |

| Solution for Fixed Effects |          |                |    |         |         |       |          |          |
|----------------------------|----------|----------------|----|---------|---------|-------|----------|----------|
| Effect                     | Estimate | Standard Error | DF | t Value | Pr >  t | Alpha | Lower    | Upper    |
| Intercept                  | -0.05574 | 0.01267        | 9  | -4.40   | 0.0017  | 0.05  | -0.08440 | -0.02708 |
| CEM_UTM                    | 0.4189   | 0.05420        | 9  | 7.73    | <.0001  | 0.05  | 0.2963   | 0.5415   |

**The Mixed Procedure**

| Type 3 Tests of Fixed Effects |        |        |         |        |
|-------------------------------|--------|--------|---------|--------|
| Effect                        | Num DF | Den DF | F Value | Pr > F |
| CEM_UTM                       | 1      | 9      | 59.74   | <.0001 |

**The REG Procedure**  
**Model: MODEL1**  
**Dependent Variable: Pred Predicted**

|                                            |    |
|--------------------------------------------|----|
| Number of Observations Read                | 26 |
| Number of Observations Used                | 11 |
| Number of Observations with Missing Values | 15 |

| Analysis of Variance |    |                |             |         |        |
|----------------------|----|----------------|-------------|---------|--------|
| Source               | DF | Sum of Squares | Mean Square | F Value | Pr > F |
| Model                | 1  | 0.00492        | 0.00492     | 59.74   | <.0001 |
| Error                | 9  | 0.00074100     | 0.00008233  |         |        |
| Corrected Total      | 10 | 0.00566        |             |         |        |

|                |          |          |        |
|----------------|----------|----------|--------|
| Root MSE       | 0.00907  | R-Square | 0.8691 |
| Dependent Mean | 0.03952  | Adj R-Sq | 0.8545 |
| Coeff Var      | 22.96071 |          |        |

| Parameter Estimates |            |    |                    |                |         |         |
|---------------------|------------|----|--------------------|----------------|---------|---------|
| Variable            | Label      | DF | Parameter Estimate | Standard Error | t Value | Pr >  t |
| Intercept           | Intercept  | 1  | 0.00517            | 0.00522        | 0.99    | 0.3473  |
| ER_UTM_dia          | ER_UTM_dia | 1  | 0.86907            | 0.11244        | 7.73    | <.0001  |

The REG Procedure  
 Model: MODEL1  
 Dependent Variable: Pred Predicted

Fit Diagnostics for Pred

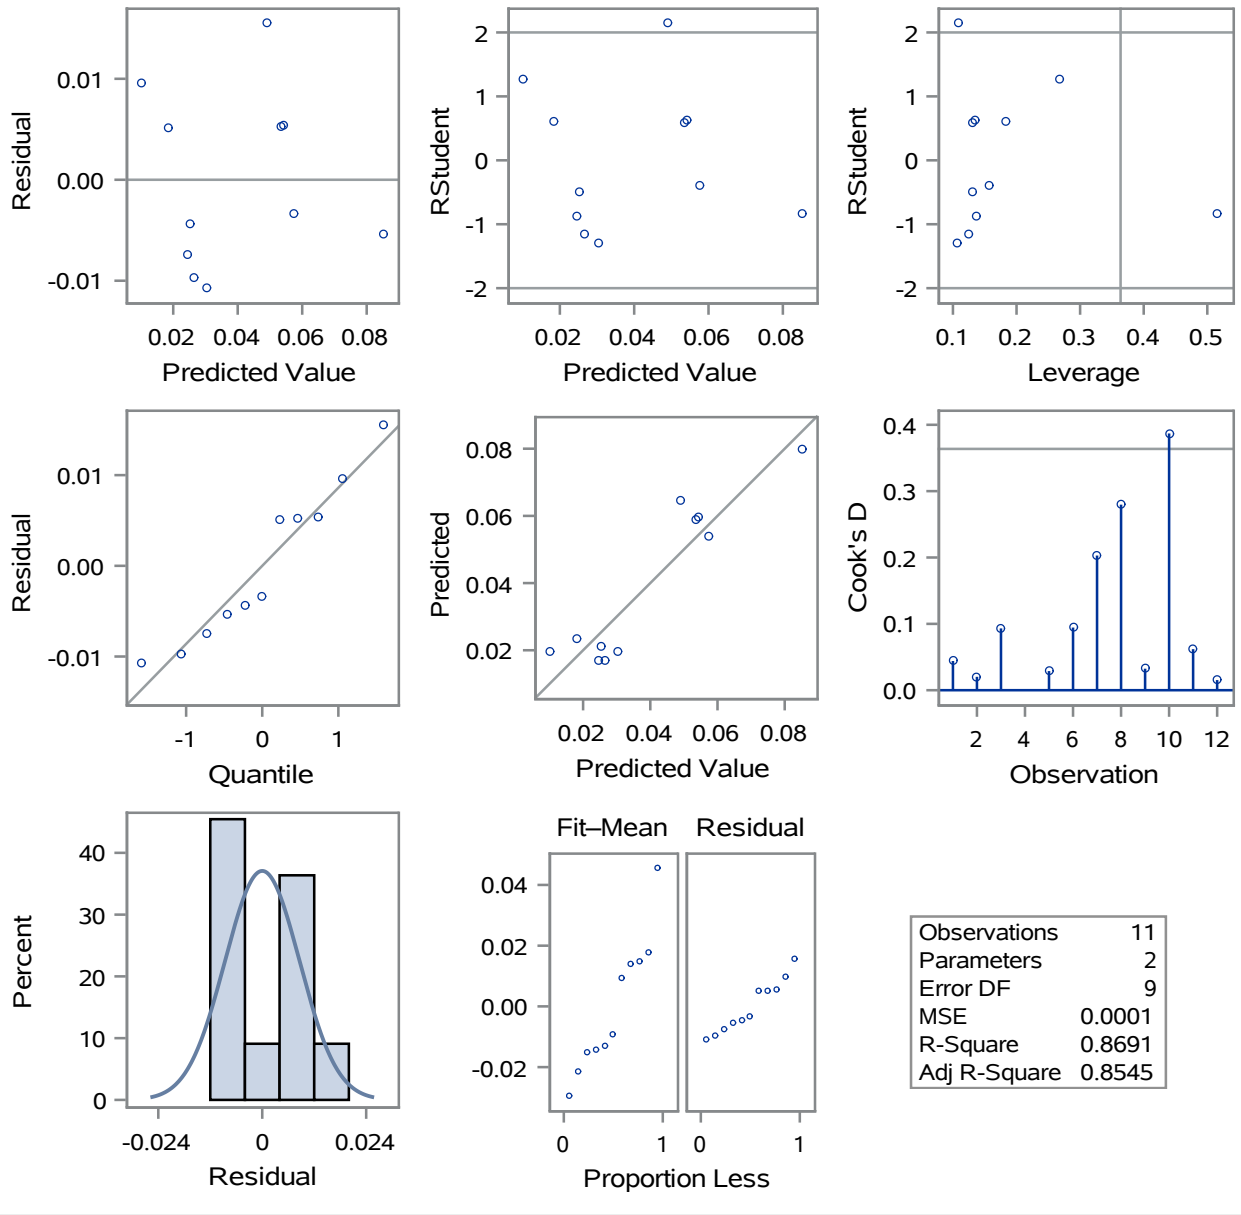

The REG Procedure  
 Model: MODEL1  
 Dependent Variable: Pred Predicted

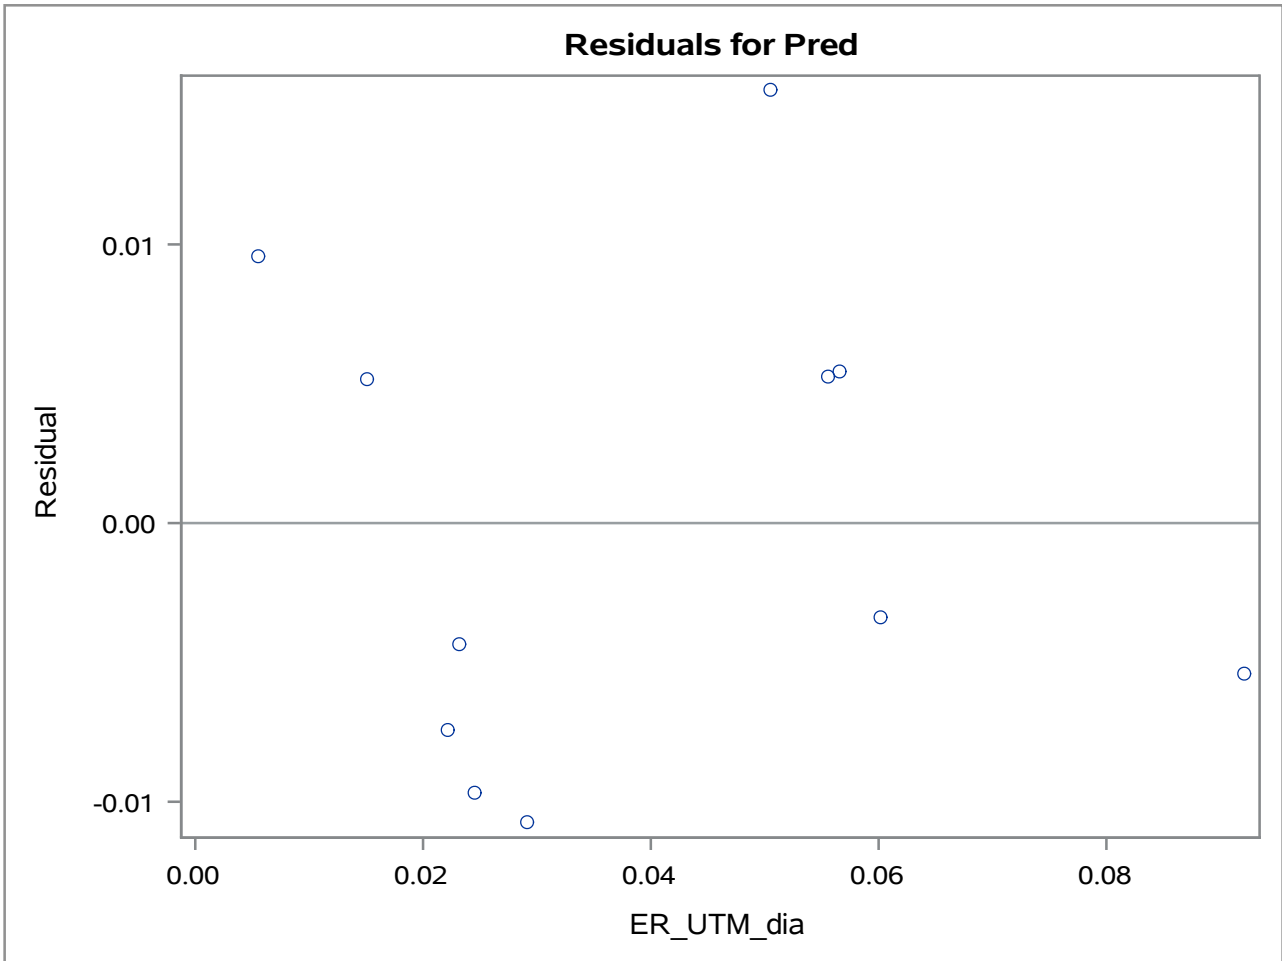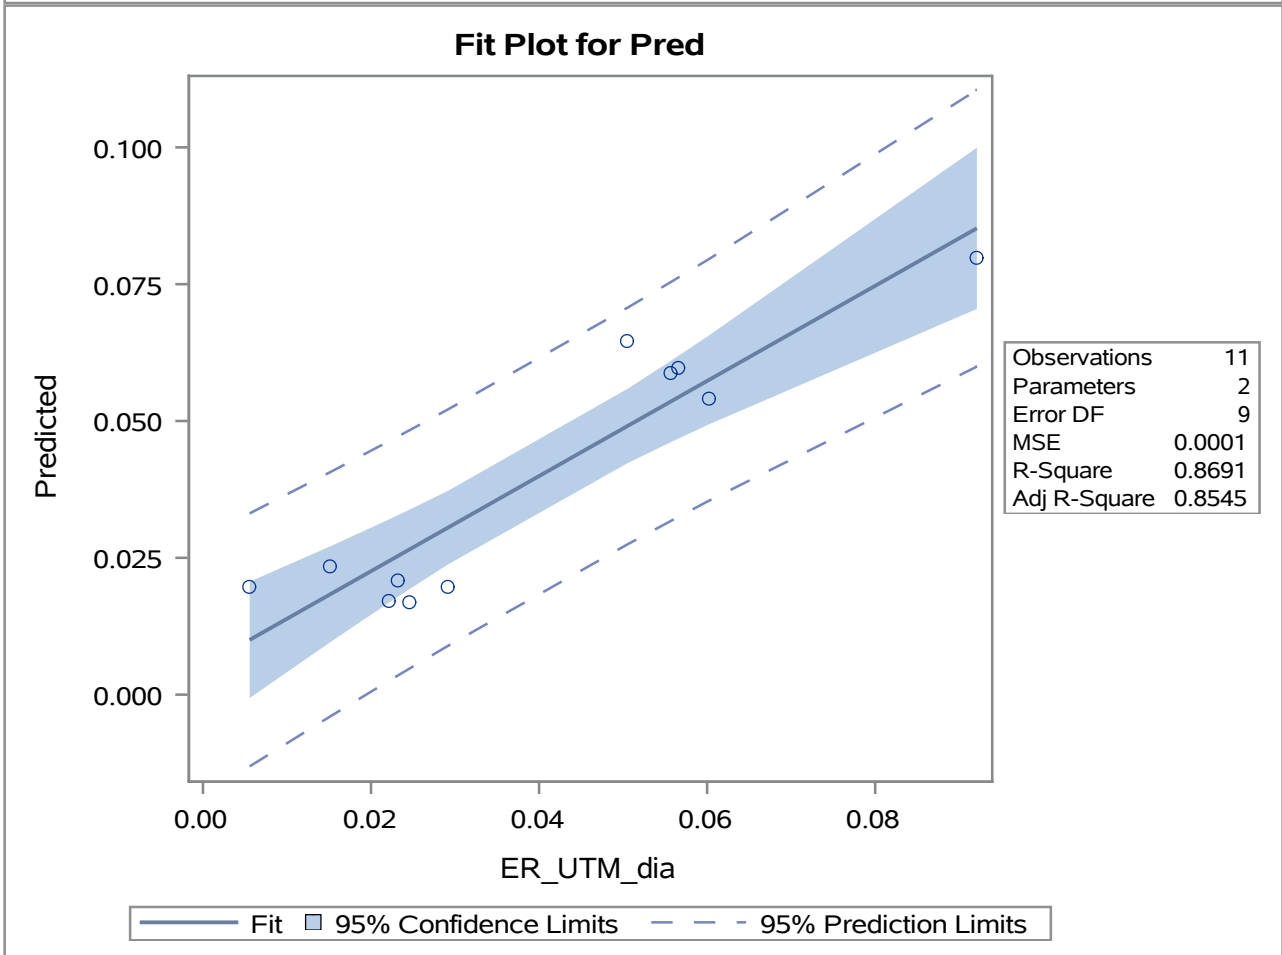

**The MEANS Procedure**

| Analysis Variable : MSE |             |                |                |                |
|-------------------------|-------------|----------------|----------------|----------------|
| <b>N</b>                | <b>Mean</b> | <b>Std Dev</b> | <b>Minimum</b> | <b>Maximum</b> |
| 11                      | 0.000077513 | 0.000073161    | 4.9512496E-6   | 0.000199087    |
