# Supplementary material for: Energy requirements for pregnant dairy cows
Source: PubMed Central journal article supplement (PMC7340303; doi:10.1371/journal.pone.0235619), 2020-07-07
Supplement: pone.0235619.s004.pdf [file pone.0235619.s004.pdf]

## The CONTENTS Procedure

|                            |                                                       |                             |      |
|----------------------------|-------------------------------------------------------|-----------------------------|------|
| <b>Data Set Name</b>       | WORK.IMPORT                                           | <b>Observations</b>         | 340  |
| <b>Member Type</b>         | DATA                                                  | <b>Variables</b>            | 132  |
| <b>Engine</b>              | V9                                                    | <b>Indexes</b>              | 0    |
| <b>Created</b>             | 06/03/2020 17:45:54                                   | <b>Observation Length</b>   | 1080 |
| <b>Last Modified</b>       | 06/03/2020 17:45:54                                   | <b>Deleted Observations</b> | 0    |
| <b>Protection</b>          |                                                       | <b>Compressed</b>           | NO   |
| <b>Data Set Type</b>       |                                                       | <b>Sorted</b>               | NO   |
| <b>Label</b>               |                                                       |                             |      |
| <b>Data Representation</b> | SOLARIS_X86_64, LINUX_X86_64, ALPHA_TRU64, LINUX_IA64 |                             |      |
| <b>Encoding</b>            | utf-8 Unicode (UTF-8)                                 |                             |      |

| Engine/Host Dependent Information |                                                                                                            |
|-----------------------------------|------------------------------------------------------------------------------------------------------------|
| <b>Data Set Page Size</b>         | 90112                                                                                                      |
| <b>Number of Data Set Pages</b>   | 5                                                                                                          |
| <b>First Data Page</b>            | 1                                                                                                          |
| <b>Max Obs per Page</b>           | 83                                                                                                         |
| <b>Obs in First Data Page</b>     | 65                                                                                                         |
| <b>Number of Data Set Repairs</b> | 0                                                                                                          |
| <b>Filename</b>                   | /tmp/SAS_work184800000A1A_localhost.localdomain/SAS_work148F00000A1A_localhost.localdomain/import.sas7bdat |
| <b>Release Created</b>            | 9.0401M6                                                                                                   |
| <b>Host Created</b>               | Linux                                                                                                      |
| <b>Inode Number</b>               | 671913                                                                                                     |
| <b>Access Permission</b>          | rw-rw-r--                                                                                                  |
| <b>Owner Name</b>                 | sasdemo                                                                                                    |
| <b>File Size</b>                  | 528KB                                                                                                      |
| <b>File Size (bytes)</b>          | 540672                                                                                                     |

## The CONTENTS Procedure

| Alphabetic List of Variables and Attributes |              |      |     |           |          |              |
|---------------------------------------------|--------------|------|-----|-----------|----------|--------------|
| #                                           | Variable     | Type | Len | Format    | Informat | Label        |
| 7                                           | AL           | Char | 3   | \$3.      | \$3.     | AL           |
| 104                                         | ANIMAL       | Num  | 8   | BEST.     |          | ANIMAL       |
| 19                                          | CARi_EE      | Num  | 8   | 15.2      |          | CARi_EE      |
| 21                                          | CARi_MCAL    | Num  | 8   | 15.2      |          | CARi_MCAL    |
| 13                                          | CARi_MN      | Num  | 8   | BEST.     |          | CARi_MN      |
| 15                                          | CARi_MS      | Num  | 8   | 15.2      |          | CARi_MS      |
| 17                                          | CARi_PB      | Num  | 8   | 15.2      |          | CARi_PB      |
| 113                                         | CCVzf        | Num  | 8   | 15.2      |          | CCVzf        |
| 114                                         | CCVzi        | Num  | 8   | 15.2      |          | CCVzi        |
| 106                                         | CEM_UTM      | Num  | 8   | COMMA15.4 |          | CEM_UTM      |
| 105                                         | CEM_dia      | Num  | 8   | COMMA15.4 |          | CEM_dia      |
| 35                                          | CTMEDIO      | Num  | 8   | 15.2      |          | CTMEDIO      |
| 45                                          | CTRET        | Num  | 8   | 15.2      |          | CTRET        |
| 42                                          | CT_EE        | Num  | 8   | 15.2      |          | CT_EE        |
| 44                                          | CT_MCAL      | Num  | 8   | 15.2      |          | CT_MCAL      |
| 34                                          | CT_MN        | Num  | 8   | 15.2      |          | CT_MN        |
| 38                                          | CT_MS        | Num  | 8   | 15.2      |          | CT_MS        |
| 40                                          | CT_PB        | Num  | 8   | 15.2      |          | CT_PB        |
| 41                                          | CTi_EE       | Num  | 8   | 15.2      |          | CTi_EE       |
| 43                                          | CTi_MCAL     | Num  | 8   | 15.2      |          | CTi_MCAL     |
| 33                                          | CTi_MN       | Num  | 8   | 15.2      |          | CTi_MN       |
| 37                                          | CTi_MS       | Num  | 8   | 15.2      |          | CTi_MS       |
| 39                                          | CTi_PB       | Num  | 8   | 15.2      |          | CTi_PB       |
| 20                                          | Carca_a_EE   | Num  | 8   | 15.2      |          | Carçaça_EE   |
| 22                                          | Carca_a_MCAL | Num  | 8   | 15.2      |          | Carçaça_MCAL |
| 14                                          | Carca_a_MN   | Num  | 8   | 15.2      |          | Carçaça_MN   |
| 16                                          | Carca_a_MS   | Num  | 8   | 15.2      |          | Carçaça_MS   |
| 18                                          | Carca_a_PB   | Num  | 8   | 15.2      |          | Carçaça_PB   |
| 2                                           | DC           | Num  | 8   | BEST.     |          | DC           |
| 8                                           | DIETA        | Num  | 8   | BEST.     |          | DIETA        |
| 93                                          | EBG          | Num  | 8   | 15.2      |          | EBG          |
| 95                                          | EBGc         | Num  | 8   | 15.2      |          | EBGc         |
| 117                                         | ELM          | Num  | 8   | COMMA15.3 |          | ELM          |
| 129                                         | ELM_nrc_     | Num  | 8   | 15.2      |          | ELM(nrc)     |
| 118                                         | EMM          | Num  | 8   | COMMA15.3 |          | EMM          |
| 120                                         | EMM_1        | Char | 24  | \$24.     | \$24.    | EMM_1        |

## The CONTENTS Procedure

| Alphabetic List of Variables and Attributes |              |      |     |           |          |              |
|---------------------------------------------|--------------|------|-----|-----------|----------|--------------|
| #                                           | Variable     | Type | Len | Format    | Informat | Label        |
| 130                                         | EMM_nrc_     | Num  | 8   | 15.2      |          | EMM(nrc)     |
| 108                                         | ER           | Num  | 8   | 15.2      |          | ER           |
| 109                                         | ERDIA        | Num  | 8   | 15.2      |          | ERDIA        |
| 110                                         | ER_UTM       | Num  | 8   | COMMA15.3 |          | ER UTM       |
| 111                                         | ER_UTM_dia   | Num  | 8   | COMMA15.3 |          | ER_UTM_dia   |
| 103                                         | EXPD         | Num  | 8   | COMMA15.4 |          | EXPD         |
| 102                                         | EXPS         | Num  | 8   | COMMA15.4 |          | EXPS         |
| 101                                         | EXP_DUPLO    | Num  | 8   | 15.2      |          | EXP DUPLO    |
| 100                                         | EXP_SIMPLES  | Num  | 8   | 15.2      |          | EXP SIMPLES  |
| 122                                         | Elgest       | Char | 18  | \$18.     | \$18.    | Elgest       |
| 127                                         | Elm_1        | Num  | 8   | 15.2      |          | Elm_1        |
| 131                                         | Elm_brcorte_ | Num  | 8   | BEST.     |          | Elm(brcorte) |
| 128                                         | Emm_2        | Num  | 8   | 15.2      |          | Emm_2        |
| 132                                         | Emm_brcorte_ | Num  | 8   | BEST.     |          | Emm(brcorte) |
| 83                                          | Feto_EE      | Num  | 8   | 15.2      |          | Feto_EE      |
| 84                                          | Feto_MCAL    | Num  | 8   | 15.2      |          | Feto_MCAL    |
| 80                                          | Feto_MN      | Num  | 8   | 15.2      |          | Feto_MN      |
| 81                                          | Feto_MS      | Num  | 8   | 15.2      |          | Feto_MS      |
| 82                                          | Feto_PB      | Num  | 8   | 15.2      |          | Feto_PB      |
| 36                                          | GCT          | Num  | 8   | 15.2      |          | GCT          |
| 90                                          | GESTMCAL     | Num  | 8   | 15.2      |          | GESTMCAL     |
| 87                                          | GESTMCALi    | Num  | 8   | 15.2      |          | GESTMCALi    |
| 55                                          | GM_EE        | Num  | 8   | 15.2      |          | GM_EE        |
| 57                                          | GM_MCAL      | Num  | 8   | 15.2      |          | GM_MCAL      |
| 49                                          | GM_MN        | Num  | 8   | 15.2      |          | GM_MN        |
| 51                                          | GM_MS        | Num  | 8   | 15.2      |          | GM_MS        |
| 53                                          | GM_PB        | Num  | 8   | 15.2      |          | GM_PB        |
| 54                                          | GMi_EE       | Num  | 8   | 15.2      |          | GMi_EE       |
| 56                                          | GMi_MCAL     | Num  | 8   | 15.2      |          | GMi_MCAL     |
| 48                                          | GMi_MN       | Num  | 8   | 15.2      |          | GMi_MN       |
| 50                                          | GMi_MS       | Num  | 8   | 15.2      |          | GMi_MS       |
| 52                                          | GMi_PB       | Num  | 8   | 15.2      |          | GMi_PB       |
| 9                                           | GPCVZ        | Num  | 8   | BEST.     |          | GPCVZ        |
| 126                                         | GPCZ         | Num  | 8   | 15.2      |          | GPCZ         |
| 3                                           | GT           | Num  | 8   | BEST.     |          | GT           |
| 78                                          | LA_EE        | Num  | 8   | 15.2      |          | LA_EE        |

## The CONTENTS Procedure

| Alphabetic List of Variables and Attributes |                |      |     |           |          |               |
|---------------------------------------------|----------------|------|-----|-----------|----------|---------------|
| #                                           | Variable       | Type | Len | Format    | Informat | Label         |
| 79                                          | LA_MCAL        | Num  | 8   | 15.2      |          | LA_MCAL       |
| 75                                          | LA_MN          | Num  | 8   | 15.2      |          | LA_MN         |
| 76                                          | LA_MS          | Num  | 8   | 15.2      |          | LA_MS         |
| 77                                          | LA_PB          | Num  | 8   | 15.2      |          | LA_PB         |
| 10                                          | LGPCVZ         | Num  | 8   | BEST.     |          | LGPCVZ        |
| 46                                          | LOGCTRET       | Num  | 8   | BEST.     |          | LOGCTRET      |
| 94                                          | LOGEBGUTM      | Num  | 8   | COMMA15.4 |          | LOGEBGUTM     |
| 112                                         | LOGGER         | Num  | 8   | COMMA15.3 |          | LOGGER        |
| 47                                          | LOGGCT         | Num  | 8   | 15.2      |          | LOGGCT        |
| 121                                         | MEG            | Char | 18  | \$18.     | \$18.    | MEG           |
| 123                                         | MEGEST         | Num  | 8   | BEST.     |          | MEGEST        |
| 91                                          | McalGESTopen   | Num  | 8   | 15.2      |          | McalGESTopen  |
| 92                                          | McalGESTpreg   | Num  | 8   | 15.2      |          | McalGESTpreg  |
| 29                                          | NCARi_EE       | Num  | 8   | 15.2      |          | NCARi_EE      |
| 31                                          | NCARi_MCAL     | Num  | 8   | 15.2      |          | NCARi_MCAL    |
| 23                                          | NCARi_MN       | Num  | 8   | 15.2      |          | NCARi_MN      |
| 25                                          | NCARi_MS       | Num  | 8   | 15.2      |          | NCARi_MS      |
| 27                                          | NCARi_PB       | Num  | 8   | 15.2      |          | NCARi_PB      |
| 30                                          | NCarca__a_EE   | Num  | 8   | 15.2      |          | NCarcaça_EE   |
| 32                                          | NCarca__a_MCAL | Num  | 8   | 15.2      |          | NCarcaça_MCAL |
| 24                                          | NCarca__a_MN   | Num  | 8   | 15.2      |          | NCarcaça_MN   |
| 26                                          | NCarca__a_MS   | Num  | 8   | 15.2      |          | NCarcaça_MS   |
| 28                                          | NCarca__a_PB   | Num  | 8   | 15.2      |          | NCarcaça_PB   |
| 116                                         | PC             | Num  | 8   | COMMA15.3 |          | PC            |
| 11                                          | PCVzf          | Num  | 8   | 15.2      |          | PCVzf         |
| 12                                          | PCVzi          | Num  | 8   | BEST.     |          | PCVzi         |
| 115                                         | PC_UTM         | Num  | 8   | COMMA15.3 |          | PC_UTM        |
| 73                                          | Placenta_EE    | Num  | 8   | 15.2      |          | Placenta_EE   |
| 74                                          | Placenta_MCAL  | Num  | 8   | 15.2      |          | Placenta_MCAL |
| 70                                          | Placenta_MN    | Num  | 8   | 15.2      |          | Placenta_MN   |
| 71                                          | Placenta_MS    | Num  | 8   | 15.2      |          | Placenta_MS   |
| 72                                          | Placenta_PB    | Num  | 8   | 15.2      |          | Placenta_PB   |
| 97                                          | SALDO          | Num  | 8   | 15.2      |          | SALDO         |
| 98                                          | SALDO_D        | Num  | 8   | 15.2      |          | SALDO/D       |
| 58                                          | SALDO_GM       | Num  | 8   | 15.2      |          | SALDO GM      |
| 99                                          | SALDO_UG       | Num  | 8   | 15.2      |          | SALDO UG      |

## The CONTENTS Procedure

| Alphabetic List of Variables and Attributes |             |      |     |           |          |             |
|---------------------------------------------|-------------|------|-----|-----------|----------|-------------|
| #                                           | Variable    | Type | Len | Format    | Informat | Label       |
| 69                                          | SALDO_UTERO | Num  | 8   | 15.2      |          | SALDO UTERO |
| 4                                           | ST          | Char | 1   | \$1.      | \$1.     | ST          |
| 5                                           | STM         | Num  | 8   | BEST.     |          | STM         |
| 6                                           | TG          | Num  | 8   | BEST.     |          | TG          |
| 65                                          | UTEROi_EE   | Num  | 8   | 15.2      |          | UTEROi_EE   |
| 67                                          | UTEROi_MCAL | Num  | 8   | 15.2      |          | UTEROi_MCAL |
| 59                                          | UTEROi_MN   | Num  | 8   | 15.2      |          | UTEROi_MN   |
| 61                                          | UTEROi_MS   | Num  | 8   | 15.2      |          | UTEROi_MS   |
| 63                                          | UTEROi_PB   | Num  | 8   | 15.2      |          | UTEROi_PB   |
| 107                                         | UTM         | Num  | 8   | 15.2      |          | UTM         |
| 125                                         | UTM_1       | Num  | 8   | 15.2      |          | UTM_1       |
| 96                                          | UTMc        | Num  | 8   | COMMA15.4 |          | UTMc        |
| 66                                          | Utero_EE    | Num  | 8   | 15.2      |          | Utero_EE    |
| 68                                          | Utero_MCAL  | Num  | 8   | 15.2      |          | Utero_MCAL  |
| 60                                          | Utero_MN    | Num  | 8   | 15.2      |          | Utero_MN    |
| 62                                          | Utero_MS    | Num  | 8   | 15.2      |          | Utero_MS    |
| 64                                          | Utero_PB    | Num  | 8   | 15.2      |          | Utero_PB    |
| 1                                           | anim        | Num  | 8   | BEST.     |          | anim        |
| 88                                          | fEBWopen    | Num  | 8   | 15.2      |          | fEBWopen    |
| 86                                          | kgGEST      | Num  | 8   | 15.2      |          | kgGEST      |
| 85                                          | kgGESTopen  | Num  | 8   | 15.2      |          | kgGESTopen  |
| 89                                          | kgGESTpreg  | Num  | 8   | 15.2      |          | kgGESTpreg  |
| 119                                         | km          | Num  | 8   | 15.2      |          | km          |
| 124                                         | kpreg       | Num  | 8   | COMMA15.4 |          | kpreg       |

**The NLIN Procedure  
Dependent Variable GESTMCAL  
Method: Gauss-Newton**

| Iterative Phase |          |        |                |
|-----------------|----------|--------|----------------|
| Iter            | a        | b      | Sum of Squares |
| 0               | 0.000040 | 2.0200 | 1396.0         |
| 1               | 0.000026 | 2.1095 | 1093.9         |
| 2               | 0.000018 | 2.2271 | 465.2          |
| 3               | 0.000021 | 2.2166 | 399.7          |
| 4               | 0.000022 | 2.2175 | 398.8          |
| 5               | 0.000022 | 2.2174 | 398.8          |

NOTE: Convergence criterion met.

| Estimation Summary    |              |
|-----------------------|--------------|
| Method                | Gauss-Newton |
| Iterations            | 5            |
| Subiterations         | 2            |
| Average Subiterations | 0.4          |
| R                     | 1.688E-7     |
| PPC(a)                | 5.249E-8     |
| RPC(a)                | 0.000072     |
| Object                | 1.382E-8     |
| Objective             | 398.8041     |
| Observations Read     | 18           |
| Observations Used     | 17           |
| Observations Missing  | 1            |

Note: An intercept was not specified for this model.

| Source            | DF | Sum of Squares | Mean Square | F Value | Approx Pr > F |
|-------------------|----|----------------|-------------|---------|---------------|
| Model             | 2  | 4879.5         | 2439.8      | 91.77   | <.0001        |
| Error             | 15 | 398.8          | 26.5869     |         |               |
| Uncorrected Total | 17 | 5278.3         |             |         |               |

| Parameter | Estimate | Approx Std Error | Approximate 95% Confidence Limits |          |
|-----------|----------|------------------|-----------------------------------|----------|
| a         | 0.000022 | 0.000066         | -0.00012                          | 0.000162 |
| b         | 2.2174   | 0.4939           | 1.1648                            | 3.2701   |

**The NLIN Procedure**

| <b>Approximate Correlation Matrix</b> |            |            |
|---------------------------------------|------------|------------|
|                                       | <b>a</b>   | <b>b</b>   |
| <b>a</b>                              | 1.0000000  | -0.9997071 |
| <b>b</b>                              | -0.9997071 | 1.0000000  |

**The REG Procedure**  
**Model: MODEL1**  
**Dependent Variable: pred**

| Analysis of Variance |    |                |             |         |        |
|----------------------|----|----------------|-------------|---------|--------|
| Source               | DF | Sum of Squares | Mean Square | F Value | Pr > F |
| Model                | 1  | 313.73335      | 313.73335   | 20.44   | 0.0004 |
| Error                | 15 | 230.23247      | 15.34883    |         |        |
| Corrected Total      | 16 | 543.96582      |             |         |        |

|                |          |          |        |
|----------------|----------|----------|--------|
| Root MSE       | 3.91776  | R-Square | 0.5768 |
| Dependent Mean | 15.96975 | Adj R-Sq | 0.5485 |
| Coeff Var      | 24.53238 |          |        |

| Parameter Estimates |           |    |                    |                |         |         |
|---------------------|-----------|----|--------------------|----------------|---------|---------|
| Variable            | Label     | DF | Parameter Estimate | Standard Error | t Value | Pr >  t |
| Intercept           | Intercept | 1  | 6.75417            | 2.24895        | 3.00    | 0.0089  |
| GESTMCAL            | GESTMCAL  | 1  | 0.57703            | 0.12763        | 4.52    | 0.0004  |



The REG Procedure  
 Model: MODEL1  
 Dependent Variable: pred

Fit Diagnostics for pred

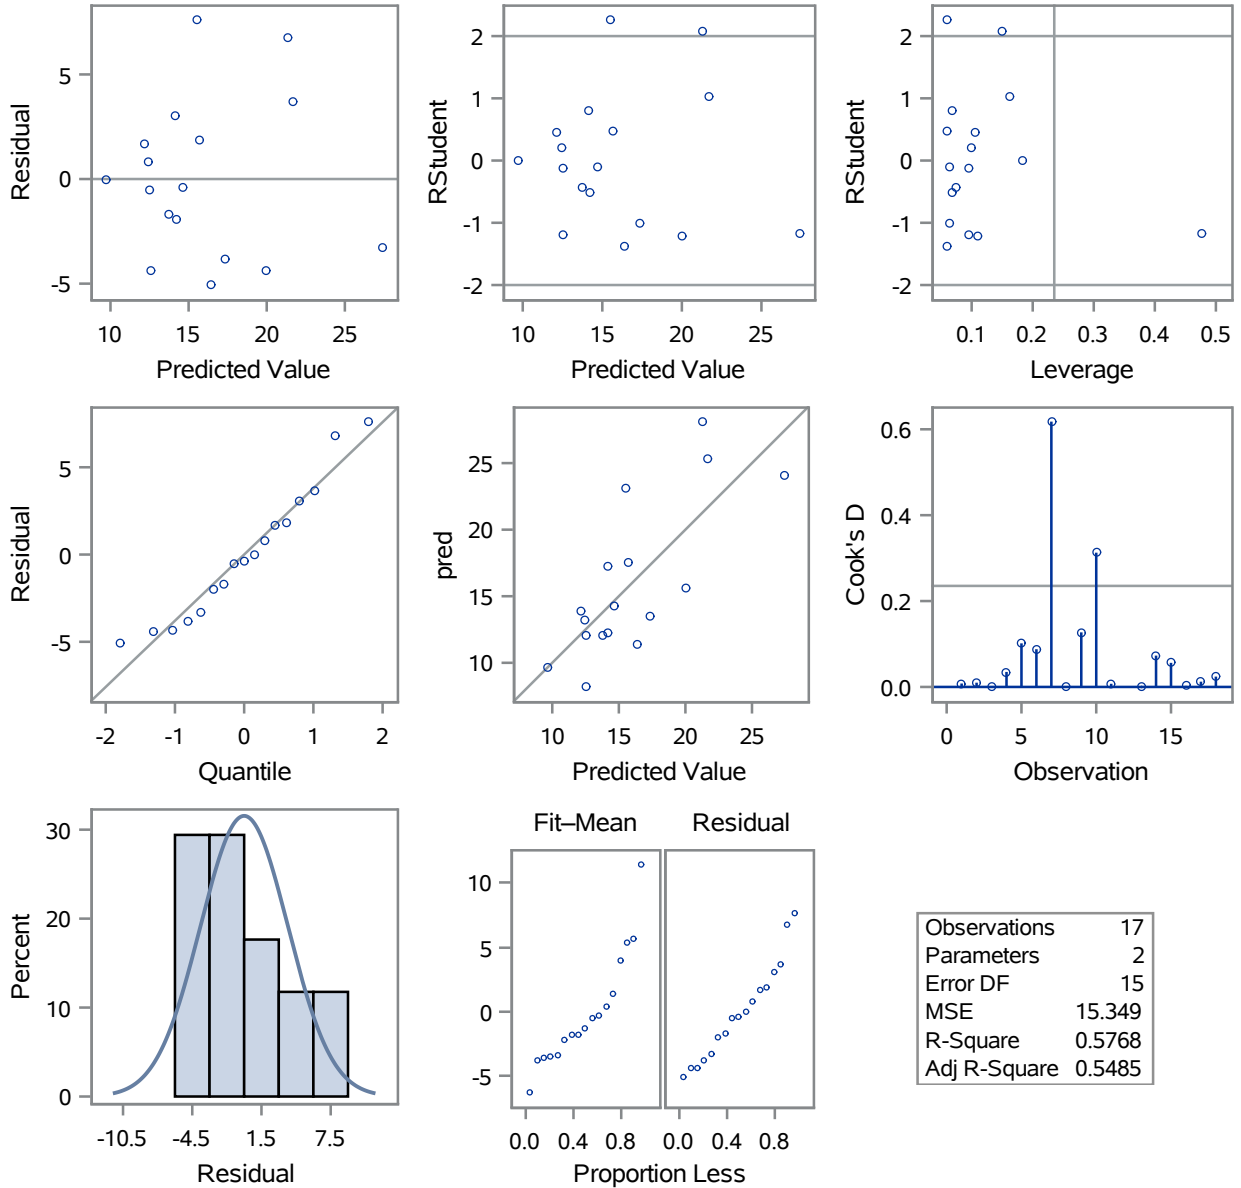

|              |        |
|--------------|--------|
| Observations | 17     |
| Parameters   | 2      |
| Error DF     | 15     |
| MSE          | 15.349 |
| R-Square     | 0.5768 |
| Adj R-Square | 0.5485 |

The REG Procedure  
Model: MODEL1  
Dependent Variable: pred

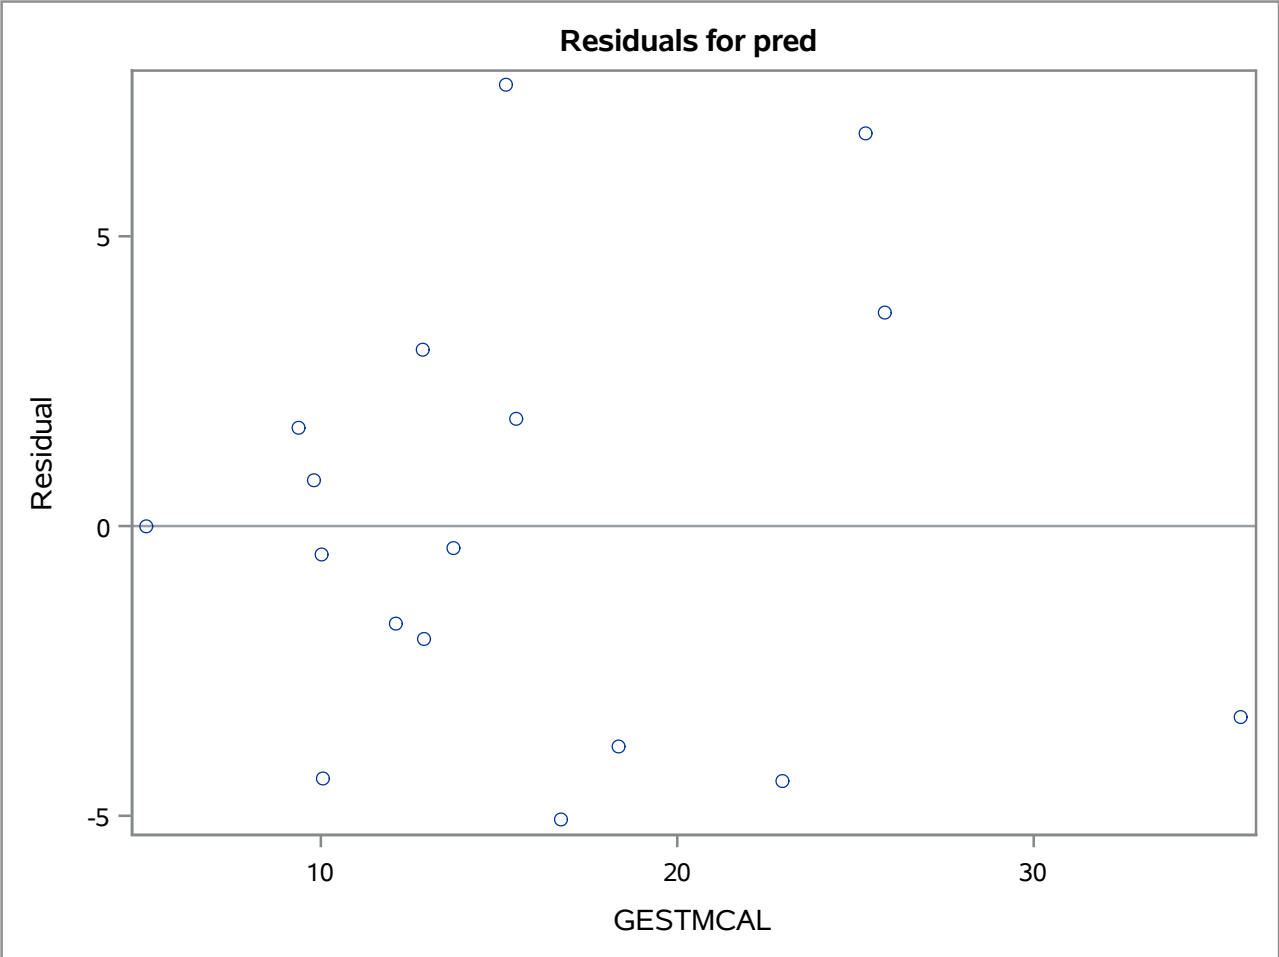

The REG Procedure  
Model: MODEL1  
Dependent Variable: pred

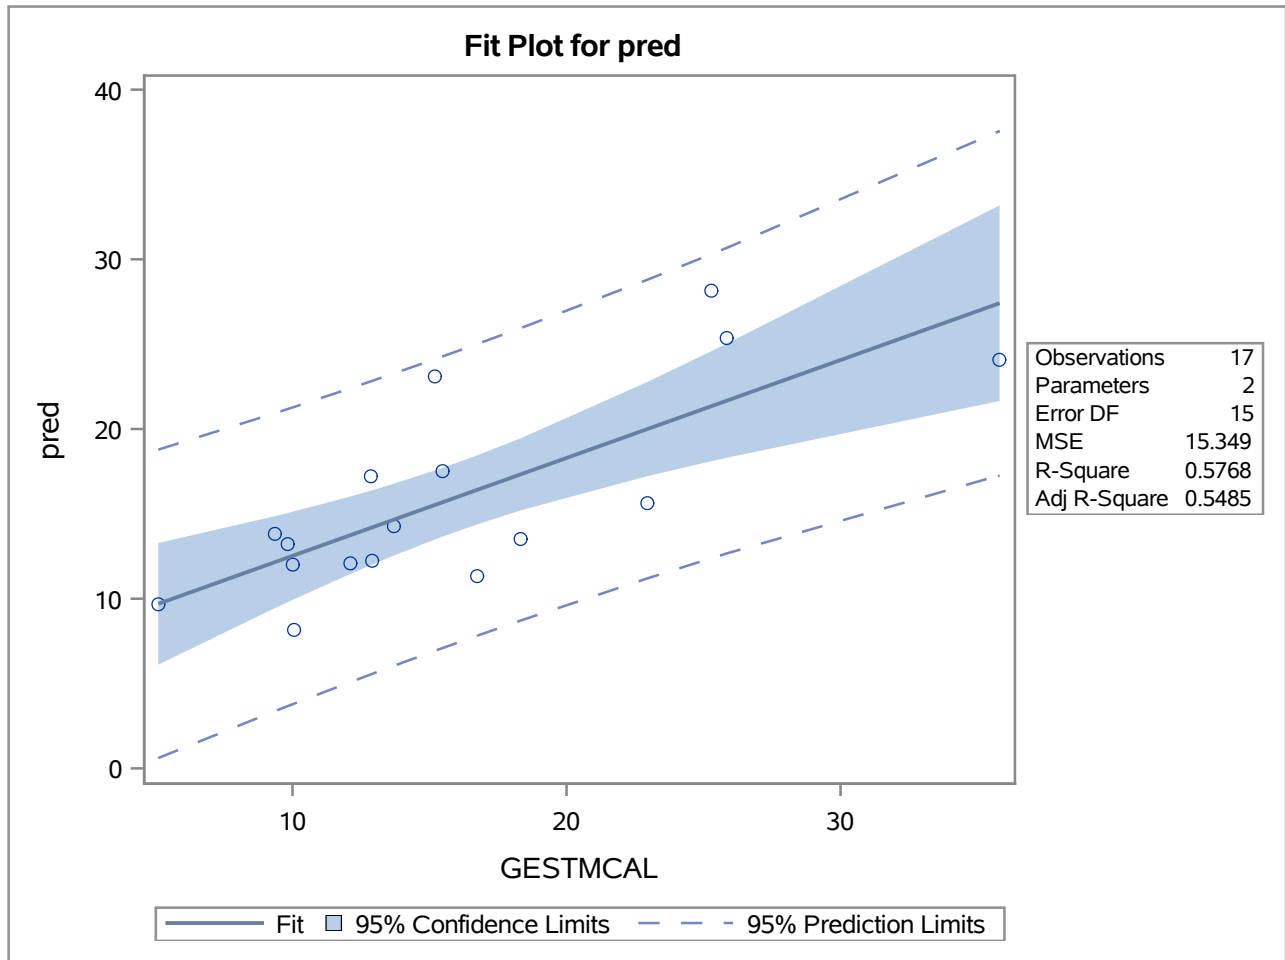

The MEANS Procedure

| Analysis Variable : MSE |            |            |           |             |
|-------------------------|------------|------------|-----------|-------------|
| N                       | Mean       | Std Dev    | Minimum   | Maximum     |
| 17                      | 23.4590627 | 34.5457785 | 0.0031314 | 136.7694281 |

**The NLIN Procedure  
Dependent Variable kgGEST  
Method: Gauss-Newton**

| Iterative Phase |          |        |                |
|-----------------|----------|--------|----------------|
| Iter            | a        | b      | Sum of Squares |
| 0               | 0.000040 | 2.0200 | 359.6          |
| 1               | 0.000073 | 1.8169 | 59.5803        |
| 2               | 0.000083 | 1.7956 | 59.3133        |
| 3               | 0.000101 | 1.7650 | 59.2297        |
| 4               | 0.000123 | 1.7325 | 58.8651        |
| 5               | 0.000171 | 1.6797 | 58.8512        |
| 6               | 0.000207 | 1.6586 | 55.6763        |
| 7               | 0.000213 | 1.6578 | 55.3856        |
| 8               | 0.000213 | 1.6577 | 55.3854        |

NOTE: Convergence criterion met.

| Estimation Summary    |              |
|-----------------------|--------------|
| Method                | Gauss-Newton |
| Iterations            | 8            |
| Subiterations         | 5            |
| Average Subiterations | 0.625        |
| R                     | 6.793E-6     |
| PPC(a)                | 6.159E-6     |
| RPC(a)                | 0.000687     |
| Object                | 3.056E-6     |
| Objective             | 55.38539     |
| Observations Read     | 18           |
| Observations Used     | 18           |
| Observations Missing  | 0            |

**Note:** An intercept was not specified for this model.

| Source            | DF | Sum of Squares | Mean Square | F Value | Approx Pr > F |
|-------------------|----|----------------|-------------|---------|---------------|
| Model             | 2  | 528.5          | 264.3       | 76.34   | <.0001        |
| Error             | 16 | 55.3854        | 3.4616      |         |               |
| Uncorrected Total | 18 | 583.9          |             |         |               |

## The NLIN Procedure

| Parameter | Estimate | Approx<br>Std Error | Approximate 95%<br>Confidence Limits |         |
|-----------|----------|---------------------|--------------------------------------|---------|
| <b>a</b>  | 0.000213 | 0.000703            | -0.00128                             | 0.00170 |
| <b>b</b>  | 1.6577   | 0.5359              | 0.5216                               | 2.7939  |

| Approximate Correlation<br>Matrix |            |            |
|-----------------------------------|------------|------------|
|                                   | <b>a</b>   | <b>b</b>   |
| <b>a</b>                          | 1.0000000  | -0.9996996 |
| <b>b</b>                          | -0.9996996 | 1.0000000  |

**The REG Procedure**  
**Model: MODEL1**  
**Dependent Variable: pred**

| Analysis of Variance |    |                |             |         |        |
|----------------------|----|----------------|-------------|---------|--------|
| Source               | DF | Sum of Squares | Mean Square | F Value | Pr > F |
| Model                | 1  | 12.64862       | 12.64862    | 9.50    | 0.0071 |
| Error                | 16 | 21.29429       | 1.33089     |         |        |
| Corrected Total      | 17 | 33.94291       |             |         |        |

|                |          |          |        |
|----------------|----------|----------|--------|
| Root MSE       | 1.15364  | R-Square | 0.3726 |
| Dependent Mean | 5.24186  | Adj R-Sq | 0.3334 |
| Coeff Var      | 22.00827 |          |        |

| Parameter Estimates |           |    |                    |                |         |         |
|---------------------|-----------|----|--------------------|----------------|---------|---------|
| Variable            | Label     | DF | Parameter Estimate | Standard Error | t Value | Pr >  t |
| Intercept           | Intercept | 1  | 3.25546            | 0.69937        | 4.65    | 0.0003  |
| kgGEST              | kgGEST    | 1  | 0.37854            | 0.12279        | 3.08    | 0.0071  |

The REG Procedure  
Model: MODEL1  
Dependent Variable: pred

Fit Diagnostics for pred

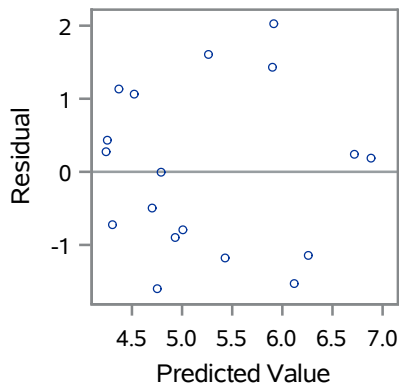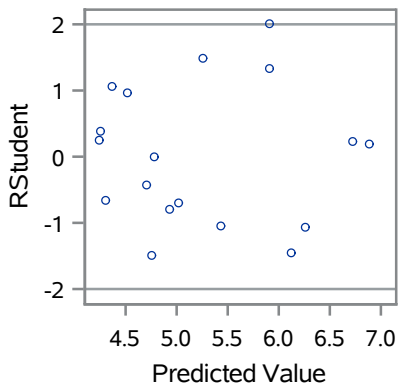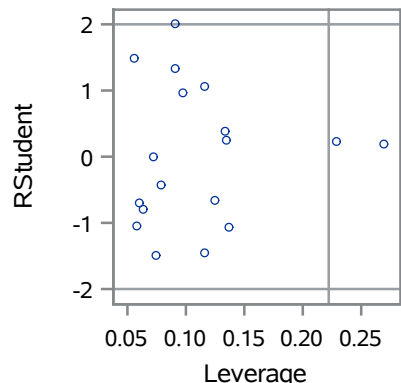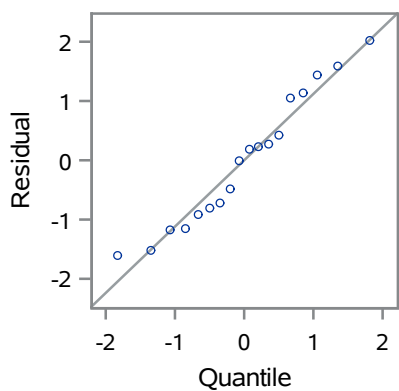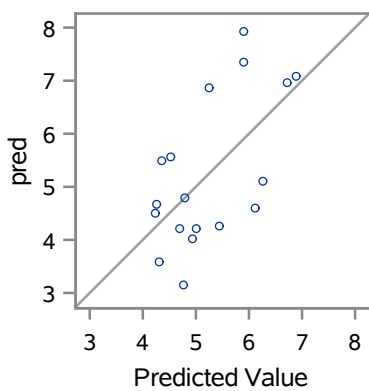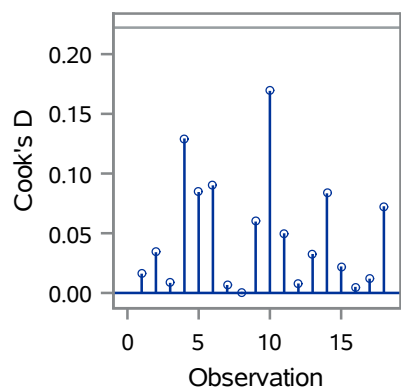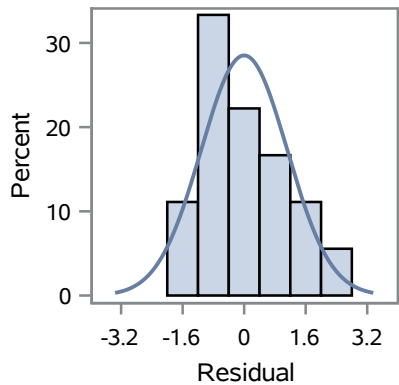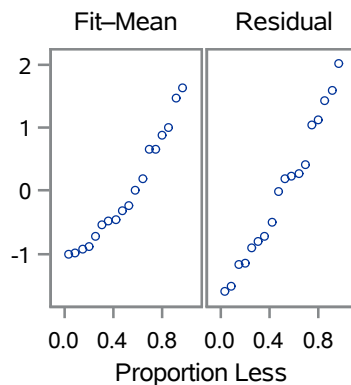

|              |        |
|--------------|--------|
| Observations | 18     |
| Parameters   | 2      |
| Error DF     | 16     |
| MSE          | 1.3309 |
| R-Square     | 0.3726 |
| Adj R-Square | 0.3334 |



The REG Procedure  
Model: MODEL1  
Dependent Variable: pred

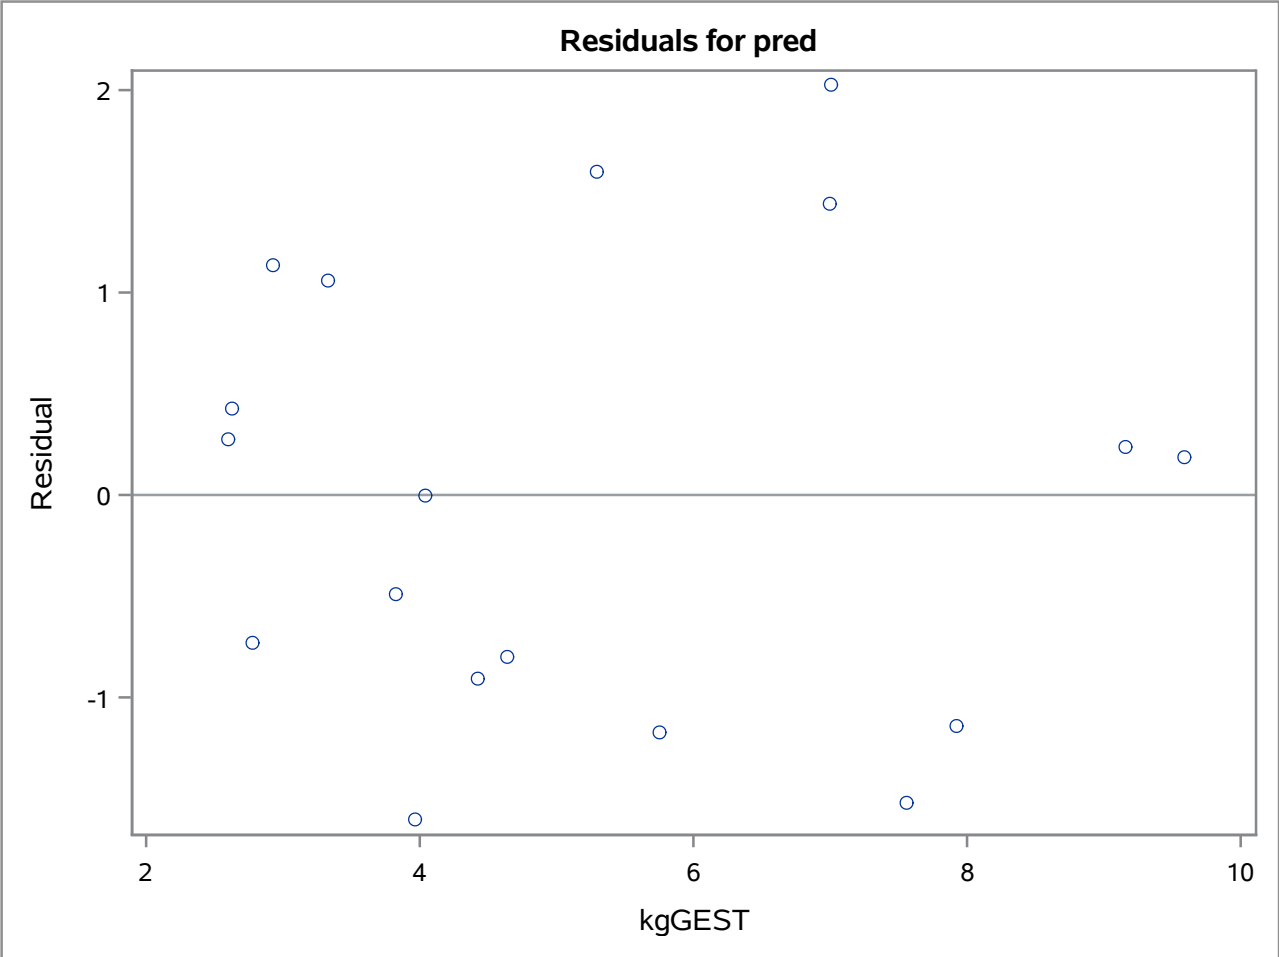

The REG Procedure  
Model: MODEL1  
Dependent Variable: pred

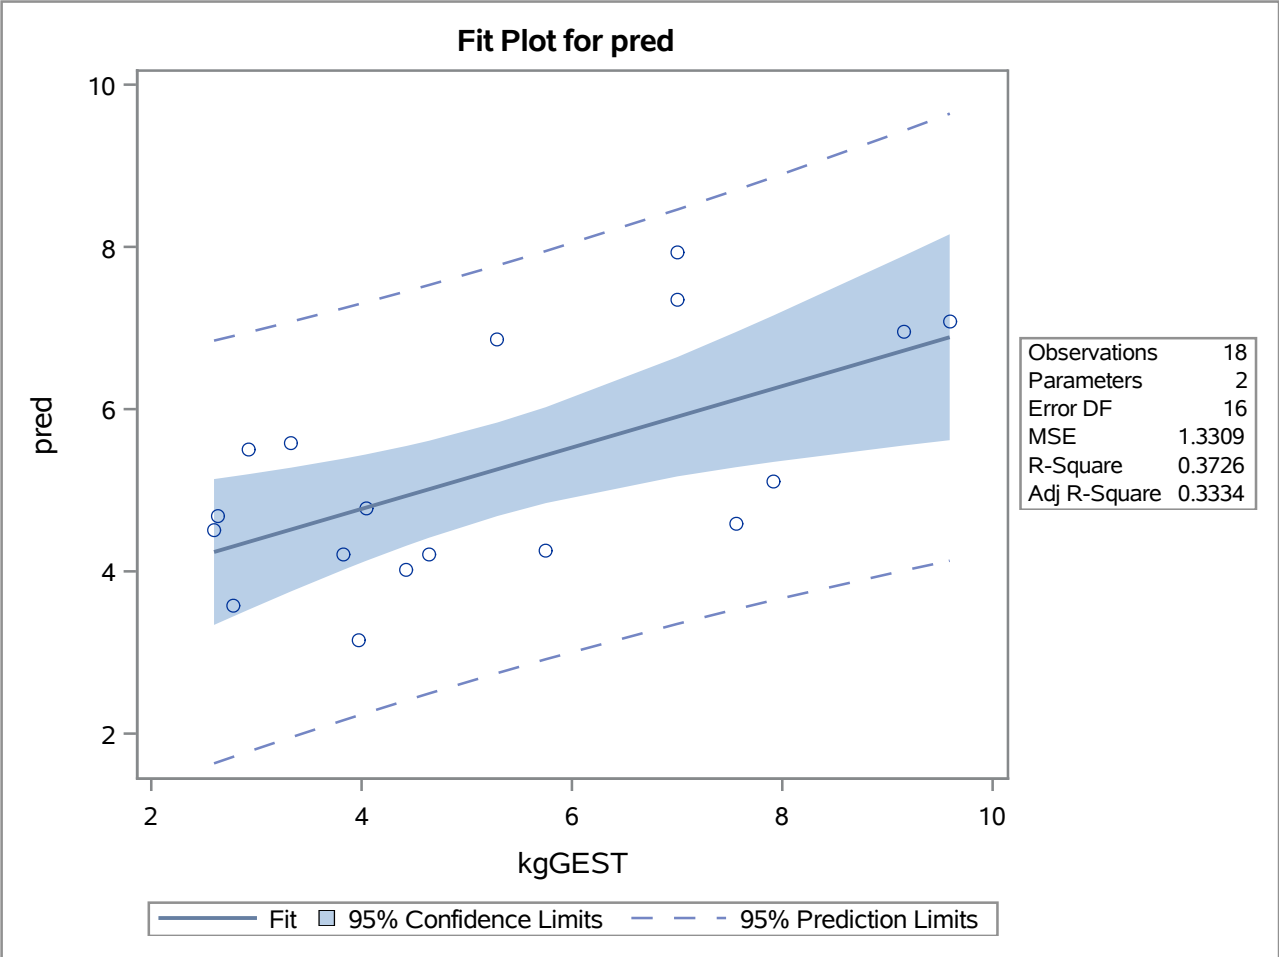

The MEANS Procedure

| Analysis Variable : MSE |           |           |           |           |
|-------------------------|-----------|-----------|-----------|-----------|
| N                       | Mean      | Std Dev   | Minimum   | Maximum   |
| 18                      | 3.0769662 | 2.9315228 | 0.1158400 | 8.7880868 |

**The NLIN Procedure**  
**Dependent Variable PC\_UTM**  
**Method: Gauss-Newton**

| Iterative Phase |        |        |                |
|-----------------|--------|--------|----------------|
| Iter            | a      | b      | Sum of Squares |
| 0               | 0.0810 | 3.6000 | 0.000365       |
| 1               | 0.0822 | 3.5821 | 0.000331       |
| 2               | 0.0822 | 3.5822 | 0.000331       |

**Note:** Missing values were generated as a result of performing an operation on missing values. Each place is given by (number of times) AT (statement)/(line):(column).

|      |          |
|------|----------|
| 6 AT | 1/143:17 |
|------|----------|

NOTE: Convergence criterion met.

| Estimation Summary   |              |
|----------------------|--------------|
| Method               | Gauss-Newton |
| Iterations           | 2            |
| R                    | 4.581E-7     |
| PPC(b)               | 8.677E-8     |
| RPC(b)               | 0.000041     |
| Object               | 2.681E-6     |
| Objective            | 0.000331     |
| Observations Read    | 18           |
| Observations Used    | 9            |
| Observations Missing | 9            |

**Note:** An intercept was not specified for this model.

| Source            | DF | Sum of Squares | Mean Square | F Value | Approx Pr > F |
|-------------------|----|----------------|-------------|---------|---------------|
| Model             | 2  | 0.3196         | 0.1598      | 3374.87 | <.0001        |
| Error             | 7  | 0.000331       | 0.000047    |         |               |
| Uncorrected Total | 9  | 0.3199         |             |         |               |

| Parameter | Estimate | Approx Std Error | Approximate 95% Confidence Limits |        |
|-----------|----------|------------------|-----------------------------------|--------|
|           |          |                  |                                   |        |
| a         | 0.0822   | 0.00517          | 0.0700                            | 0.0944 |
| b         | 3.5822   | 0.2574           | 2.9736                            | 4.1908 |

The NLIN Procedure

| Approximate Correlation Matrix |            |            |
|--------------------------------|------------|------------|
|                                | a          | b          |
| a                              | 1.0000000  | -0.9811168 |
| b                              | -0.9811168 | 1.0000000  |

**The REG Procedure**  
**Model: MODEL1**  
**Dependent Variable: pred**

| Analysis of Variance |    |                |             |         |        |
|----------------------|----|----------------|-------------|---------|--------|
| Source               | DF | Sum of Squares | Mean Square | F Value | Pr > F |
| Model                | 1  | 0.00907        | 0.00907     | 198.04  | <.0001 |
| Error                | 7  | 0.00032061     | 0.00004580  |         |        |
| Corrected Total      | 8  | 0.00939        |             |         |        |

|                |         |          |        |
|----------------|---------|----------|--------|
| Root MSE       | 0.00677 | R-Square | 0.9659 |
| Dependent Mean | 0.18564 | Adj R-Sq | 0.9610 |
| Coeff Var      | 3.64557 |          |        |

| Parameter Estimates |           |    |                    |                |         |         |
|---------------------|-----------|----|--------------------|----------------|---------|---------|
| Variable            | Label     | DF | Parameter Estimate | Standard Error | t Value | Pr >  t |
| Intercept           | Intercept | 1  | 0.00619            | 0.01295        | 0.48    | 0.6474  |
| PC_UTM              | PC_UTM    | 1  | 0.96665            | 0.06869        | 14.07   | <.0001  |

The REG Procedure  
 Model: MODEL1  
 Dependent Variable: pred

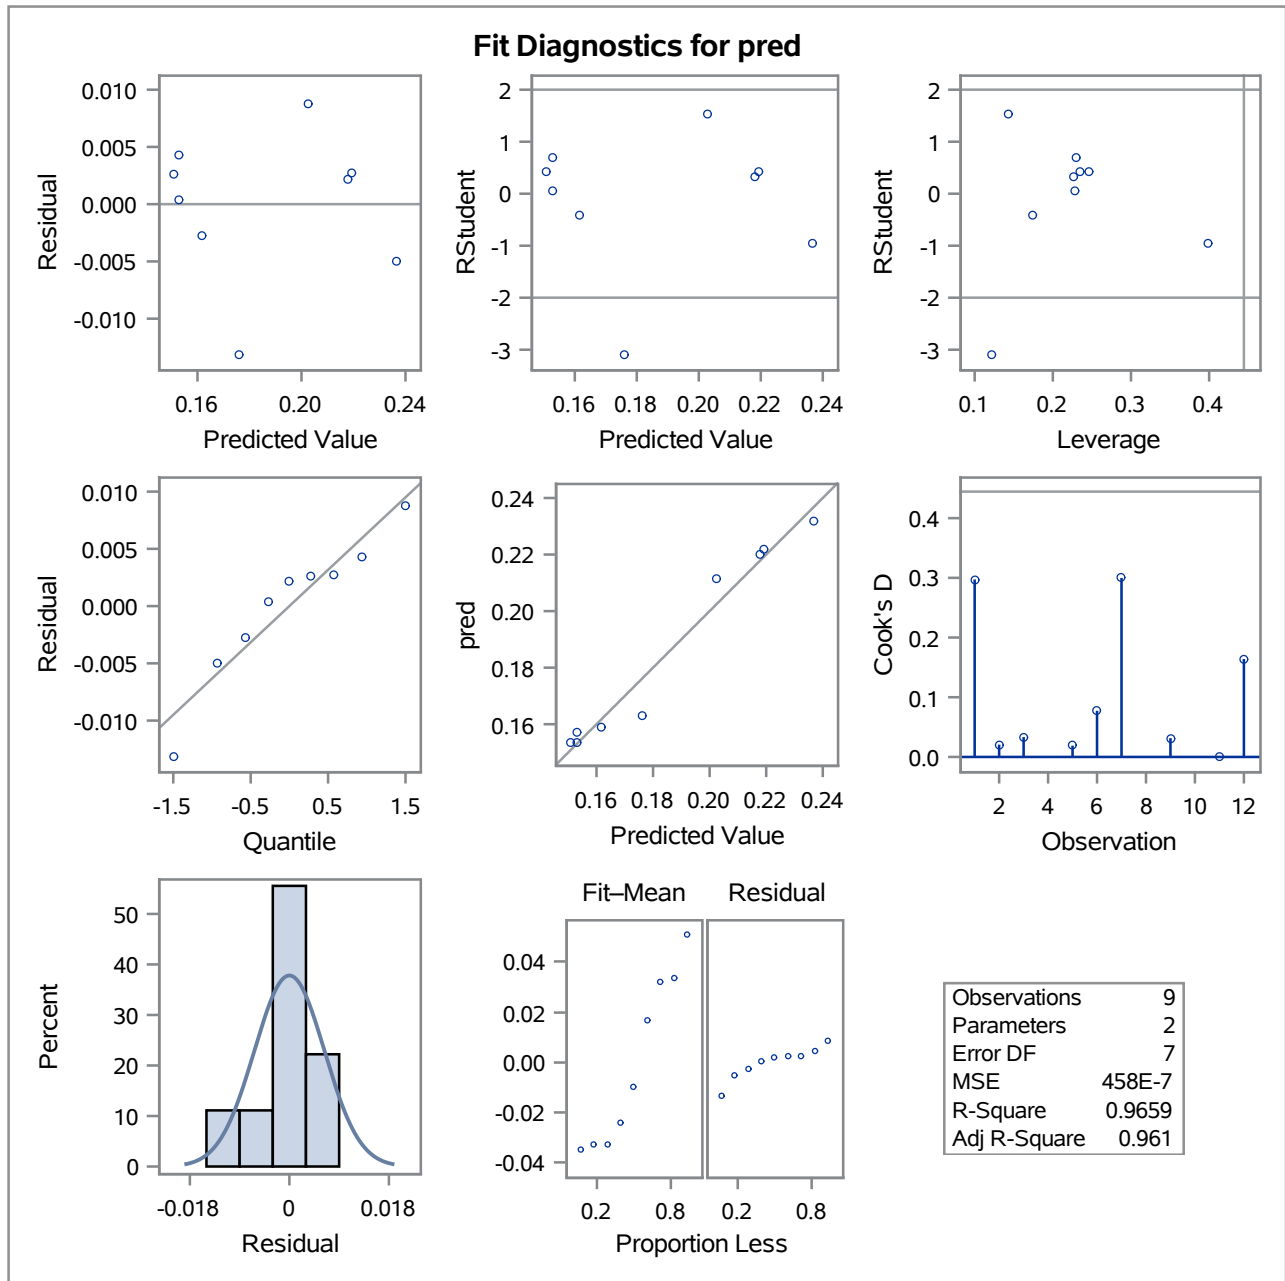

The REG Procedure  
Model: MODEL1  
Dependent Variable: pred

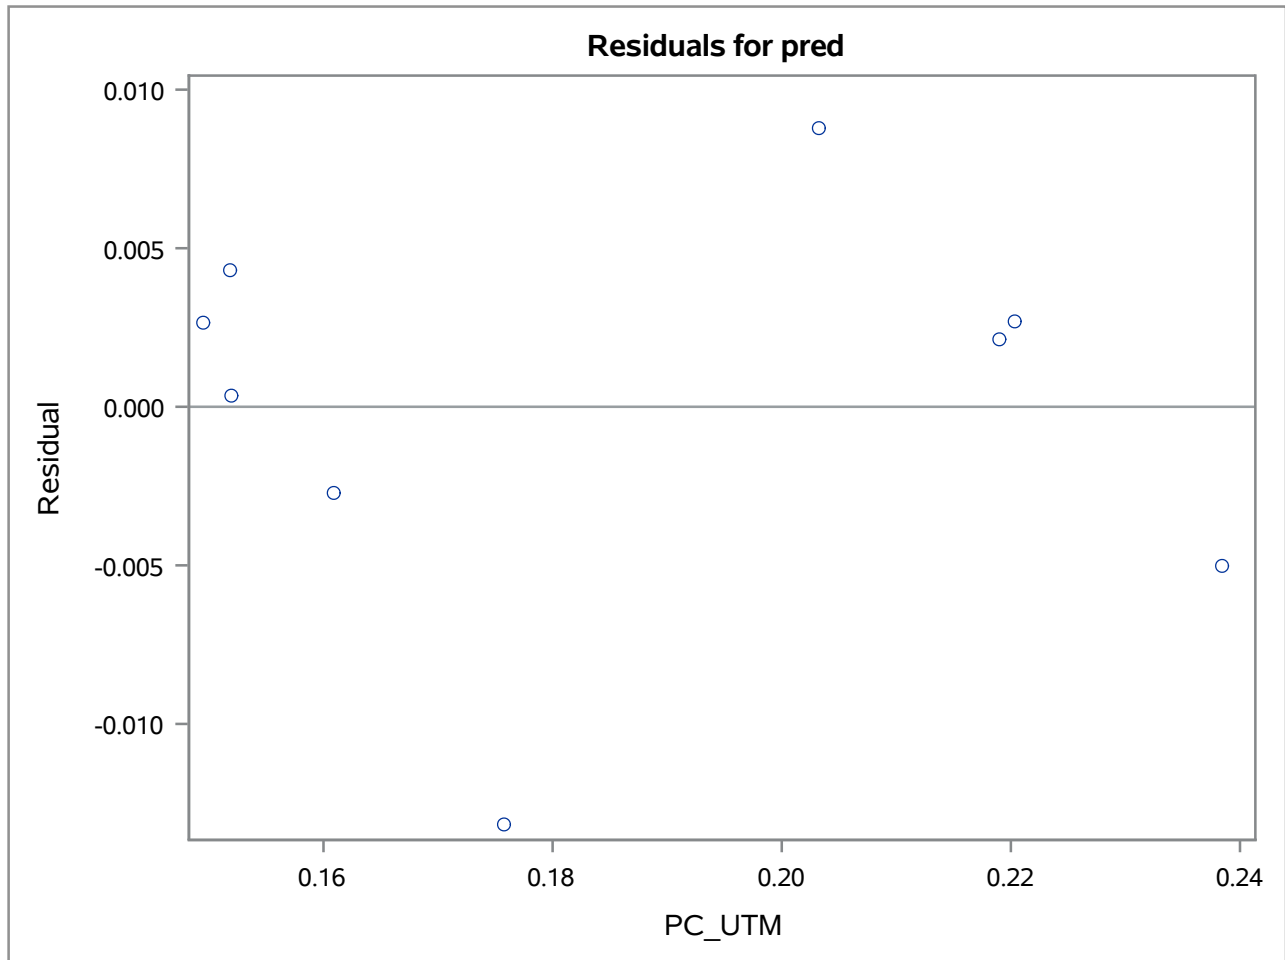



The REG Procedure  
Model: MODEL1  
Dependent Variable: pred

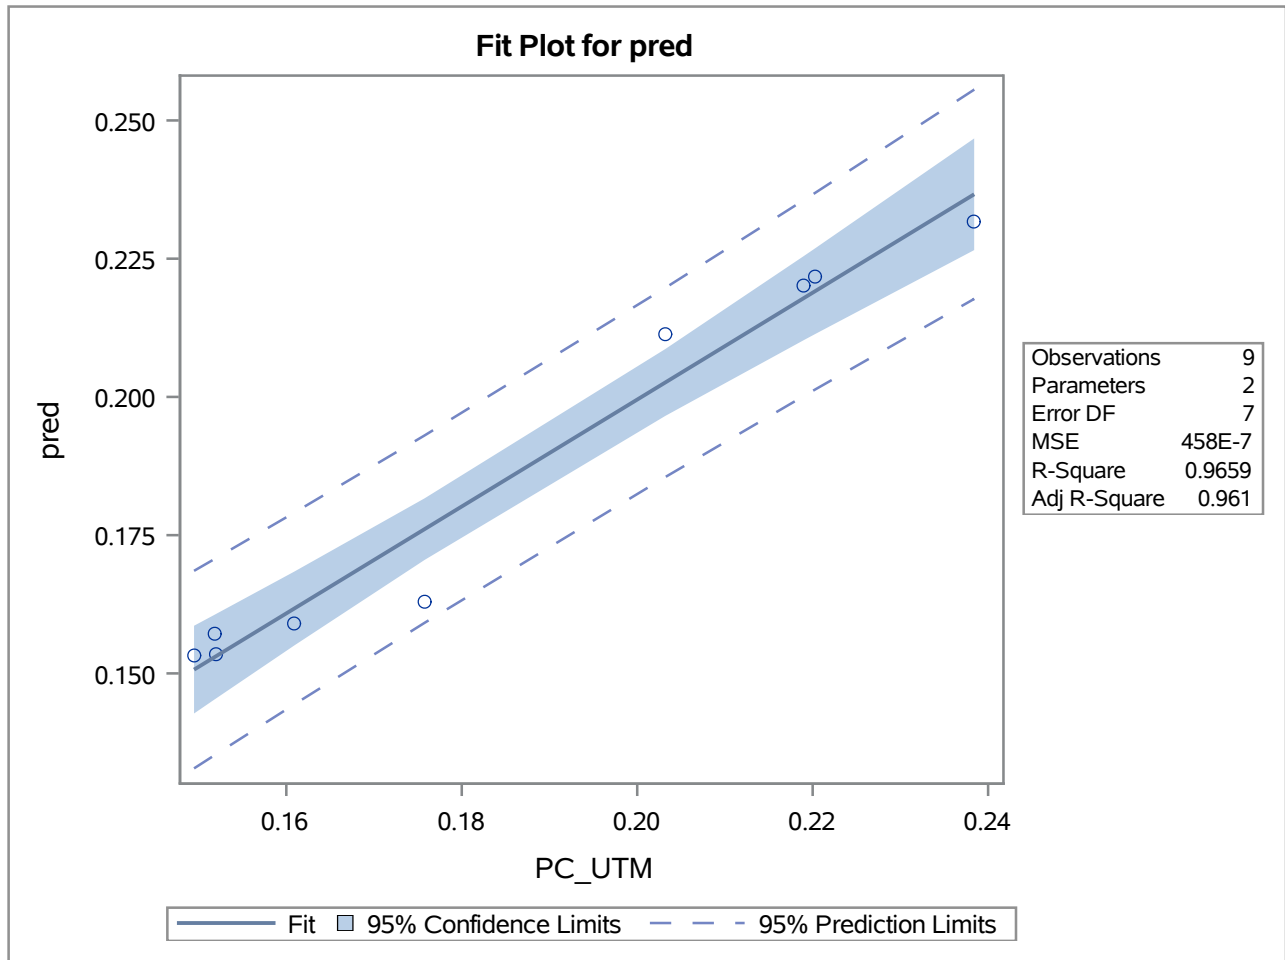

The MEANS Procedure

| Analysis Variable : MSE |             |             |              |             |
|-------------------------|-------------|-------------|--------------|-------------|
| N                       | Mean        | Std Dev     | Minimum      | Maximum     |
| 9                       | 0.000036823 | 0.000053372 | 1.0531557E-6 | 0.000165138 |

The NLIN Procedure  
 Dependent Variable PC\_UTM  
 Method: Gauss-Newton

| Iterative Phase |        |        |                |
|-----------------|--------|--------|----------------|
| Iter            | a      | b      | Sum of Squares |
| 0               | 0.0810 | 3.6000 | 0.00655        |
| 1               | 0.0856 | 3.4218 | 0.00616        |
| 2               | 0.0857 | 3.4259 | 0.00616        |
| 3               | 0.0857 | 3.4258 | 0.00616        |

**Note:** Missing values were generated as a result of performing an operation on missing values. Each place is given by (number of times) AT (statement)/(line):(column).

|        |          |
|--------|----------|
| 280 AT | 1/164:17 |
|--------|----------|

NOTE: Convergence criterion met.

| Estimation Summary   |              |
|----------------------|--------------|
| Method               | Gauss-Newton |
| Iterations           | 3            |
| R                    | 3.745E-7     |
| PPC(b)               | 1.102E-7     |
| RPC(b)               | 0.000012     |
| Object               | 1.972E-9     |
| Objective            | 0.00616      |
| Observations Read    | 322          |
| Observations Used    | 42           |
| Observations Missing | 280          |

**Note:** An intercept was not specified for this model.

| Source            | DF | Sum of Squares | Mean Square | F Value | Approx Pr > F |
|-------------------|----|----------------|-------------|---------|---------------|
| Model             | 2  | 1.6113         | 0.8057      | 5231.51 | <.0001        |
| Error             | 40 | 0.00616        | 0.000154    |         |               |
| Uncorrected Total | 42 | 1.6175         |             |         |               |

| Parameter | Estimate | Approx Std Error | Approximate 95% Confidence Limits |        |
|-----------|----------|------------------|-----------------------------------|--------|
|           |          |                  |                                   |        |
| a         | 0.0857   | 0.00358          | 0.0784                            | 0.0929 |
| b         | 3.4258   | 0.1593           | 3.1038                            | 3.7479 |

The NLIN Procedure

| Approximate Correlation Matrix |            |            |
|--------------------------------|------------|------------|
|                                | a          | b          |
| a                              | 1.0000000  | -0.9722117 |
| b                              | -0.9722117 | 1.0000000  |

The REG Procedure  
 Model: MODEL1  
 Dependent Variable: pred

| Analysis of Variance |    |                |             |         |        |
|----------------------|----|----------------|-------------|---------|--------|
| Source               | DF | Sum of Squares | Mean Square | F Value | Pr > F |
| Model                | 1  | 0.06719        | 0.06719     | 477.13  | <.0001 |
| Error                | 40 | 0.00563        | 0.00014082  |         |        |
| Corrected Total      | 41 | 0.07282        |             |         |        |

|                |         |          |        |
|----------------|---------|----------|--------|
| Root MSE       | 0.01187 | R-Square | 0.9226 |
| Dependent Mean | 0.19139 | Adj R-Sq | 0.9207 |
| Coeff Var      | 6.20026 |          |        |

| Parameter Estimates |           |    |                    |                |         |         |
|---------------------|-----------|----|--------------------|----------------|---------|---------|
| Variable            | Label     | DF | Parameter Estimate | Standard Error | t Value | Pr >  t |
| Intercept           | Intercept | 1  | 0.01561            | 0.00825        | 1.89    | 0.0658  |
| PC_UTM              | PC_UTM    | 1  | 0.91863            | 0.04206        | 21.84   | <.0001  |

The REG Procedure  
 Model: MODEL1  
 Dependent Variable: pred

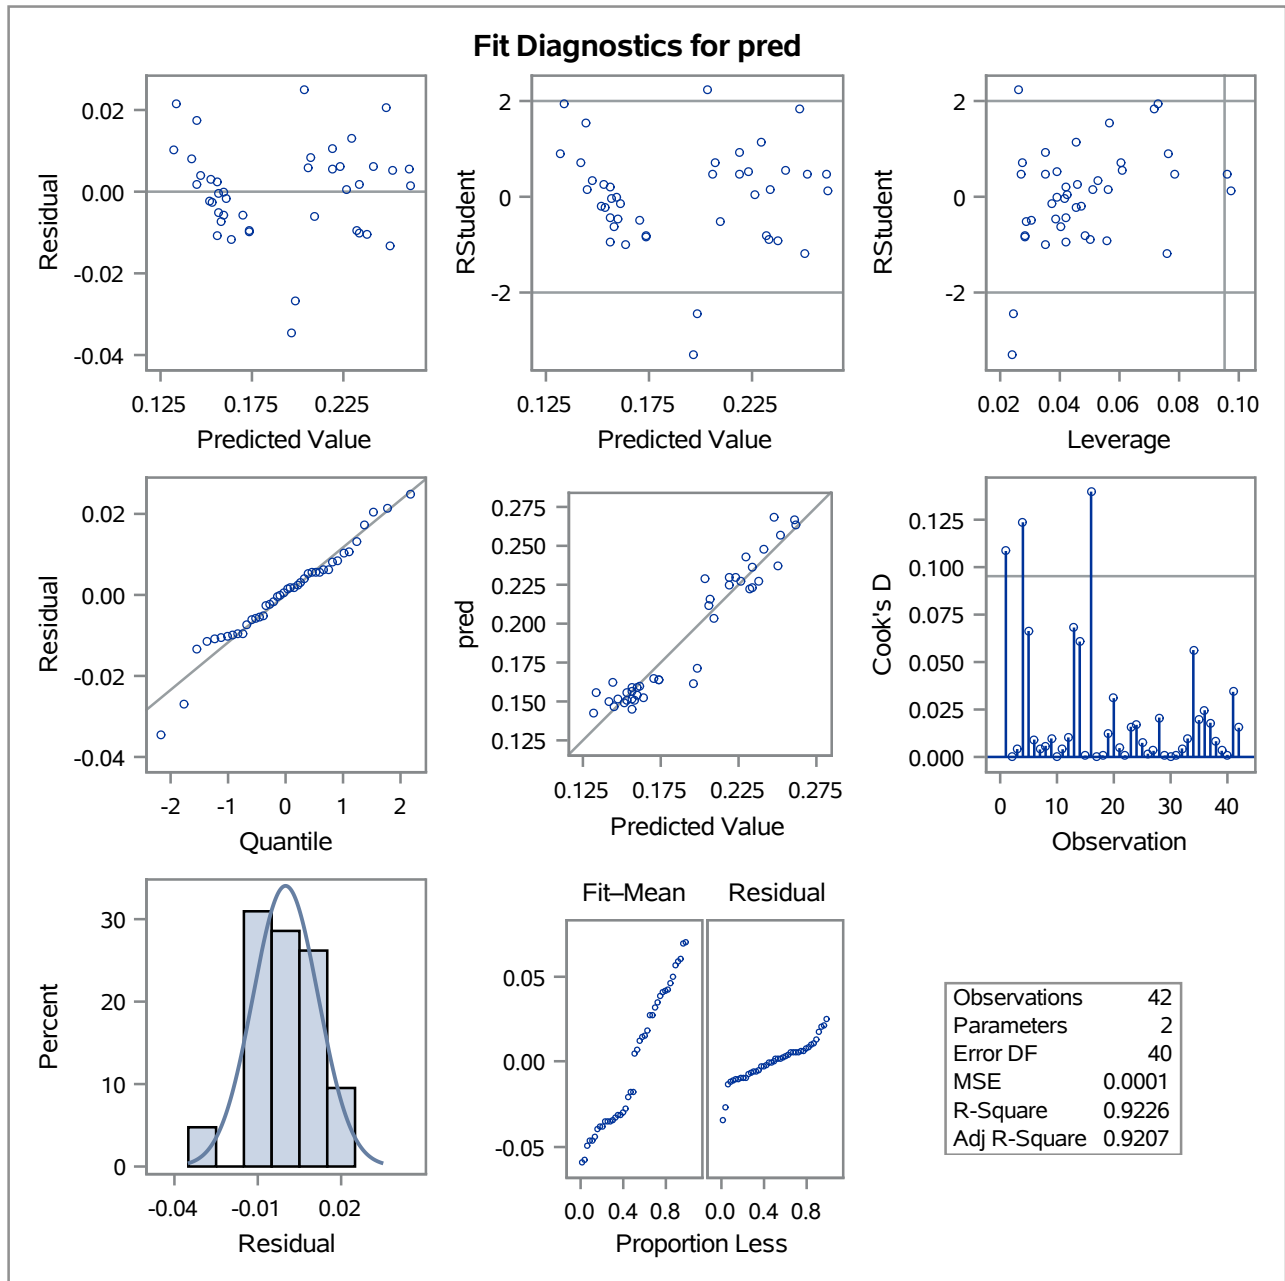

The REG Procedure  
Model: MODEL1  
Dependent Variable: pred

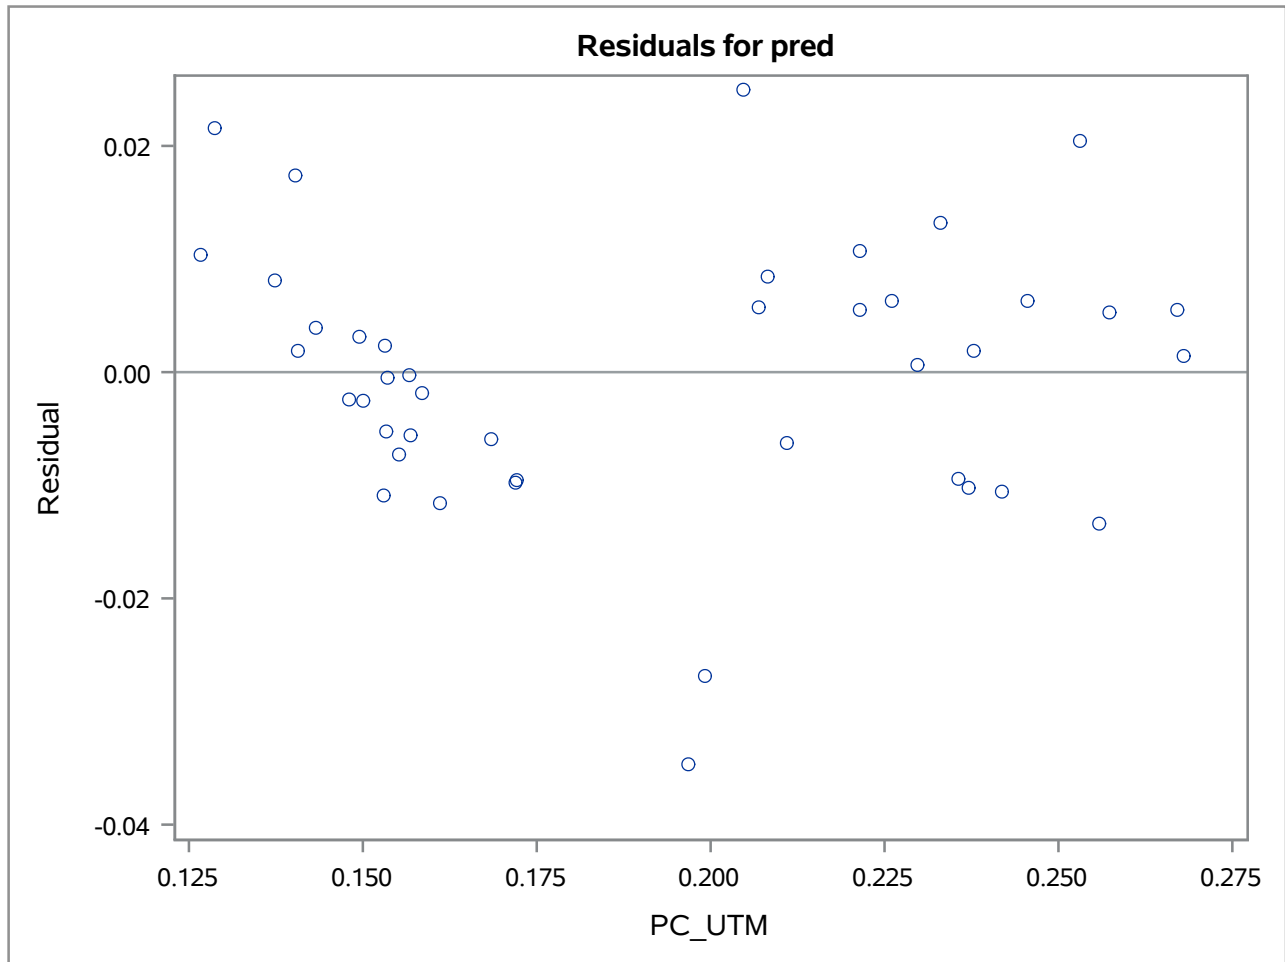

The REG Procedure  
Model: MODEL1  
Dependent Variable: pred

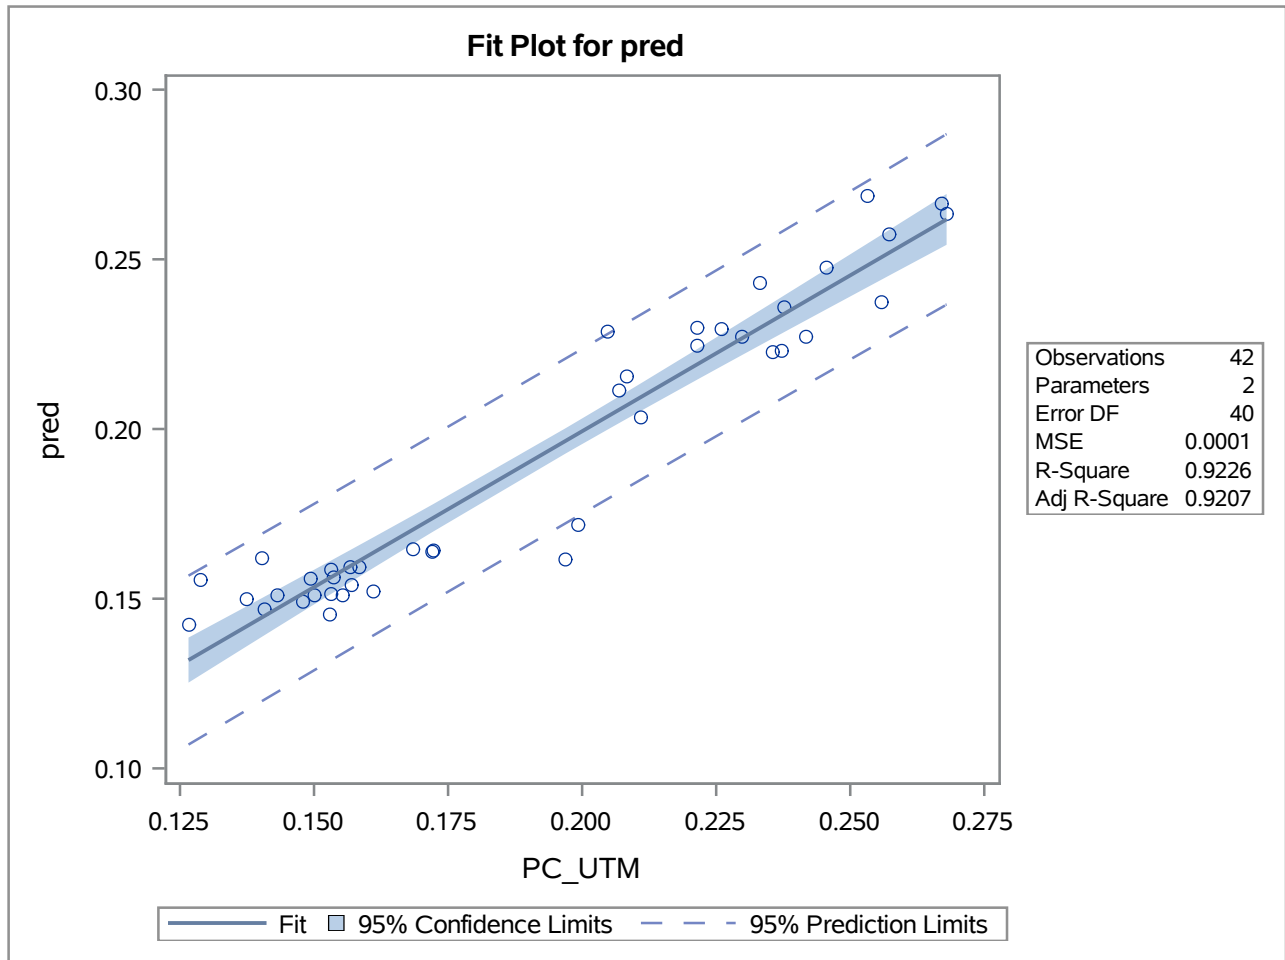



The MEANS Procedure

| Analysis Variable : MSE |             |             |              |           |
|-------------------------|-------------|-------------|--------------|-----------|
| N                       | Mean        | Std Dev     | Minimum      | Maximum   |
| 42                      | 0.000146667 | 0.000254507 | 1.5479249E-9 | 0.0012314 |

**The NLIN Procedure  
Dependent Variable ERDIA  
Method: Gauss-Newton**

| Iterative Phase |        |        |                |
|-----------------|--------|--------|----------------|
| Iter            | a      | b      | Sum of Squares |
| 0               | 0.0600 | 1.0900 | 9.6828         |
| 1               | 0.0635 | 0.6848 | 1.9067         |
| 2               | 0.0624 | 0.7231 | 1.6852         |
| 3               | 0.0624 | 0.7241 | 1.6852         |
| 4               | 0.0624 | 0.7241 | 1.6852         |

**Note:** Missing values were generated as a result of performing an operation on missing values. Each place is given by (number of times) AT (statement)/(line):(column).

|      |          |
|------|----------|
| 6 AT | 1/186:20 |
|------|----------|

|                                  |
|----------------------------------|
| NOTE: Convergence criterion met. |
|----------------------------------|

| Estimation Summary   |              |
|----------------------|--------------|
| Method               | Gauss-Newton |
| Iterations           | 4            |
| R                    | 3.198E-7     |
| PPC(b)               | 6.608E-8     |
| RPC(b)               | 9.204E-6     |
| Object               | 1.974E-9     |
| Objective            | 1.685157     |
| Observations Read    | 18           |
| Observations Used    | 12           |
| Observations Missing | 6            |

**Note:** An intercept was not specified for this model.

| Source            | DF | Sum of Squares | Mean Square | F Value | Approx Pr > F |
|-------------------|----|----------------|-------------|---------|---------------|
| Model             | 2  | 252.5          | 126.3       | 749.33  | <.0001        |
| Error             | 10 | 1.6852         | 0.1685      |         |               |
| Uncorrected Total | 12 | 254.2          |             |         |               |

| Parameter | Estimate | Approx Std Error | Approximate 95% Confidence Limits |        |
|-----------|----------|------------------|-----------------------------------|--------|
|           |          |                  |                                   |        |
| a         | 0.0624   | 0.00161          | 0.0588                            | 0.0660 |
| b         | 0.7241   | 0.0473           | 0.6187                            | 0.8295 |

The NLIN Procedure

| Approximate Correlation Matrix |           |           |
|--------------------------------|-----------|-----------|
|                                | a         | b         |
| a                              | 1.0000000 | 0.0605022 |
| b                              | 0.0605022 | 1.0000000 |

The REG Procedure  
 Model: MODEL1  
 Dependent Variable: pred

| Analysis of Variance |    |                |             |         |        |
|----------------------|----|----------------|-------------|---------|--------|
| Source               | DF | Sum of Squares | Mean Square | F Value | Pr > F |
| Model                | 1  | 68.38751       | 68.38751    | 415.50  | <.0001 |
| Error                | 10 | 1.64591        | 0.16459     |         |        |
| Corrected Total      | 11 | 70.03342       |             |         |        |

|                |          |          |        |
|----------------|----------|----------|--------|
| Root MSE       | 0.40570  | R-Square | 0.9765 |
| Dependent Mean | 3.89992  | Adj R-Sq | 0.9741 |
| Coeff Var      | 10.40271 |          |        |

| Parameter Estimates |           |    |                    |                |         |         |
|---------------------|-----------|----|--------------------|----------------|---------|---------|
| Variable            | Label     | DF | Parameter Estimate | Standard Error | t Value | Pr >  t |
| Intercept           | Intercept | 1  | 0.09109            | 0.22052        | 0.41    | 0.6883  |
| ERDIA               | ERDIA     | 1  | 0.97660            | 0.04791        | 20.38   | <.0001  |

The REG Procedure  
 Model: MODEL1  
 Dependent Variable: pred

Fit Diagnostics for pred

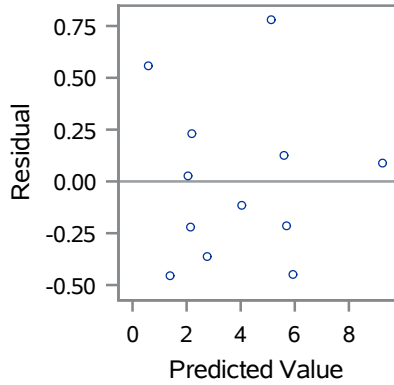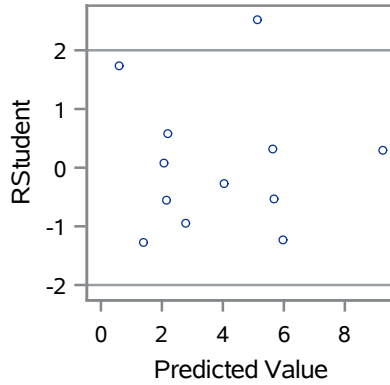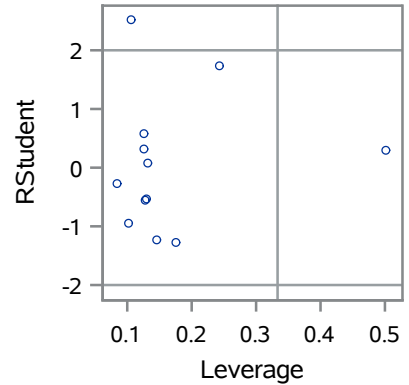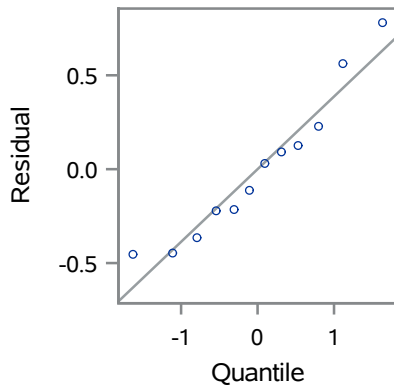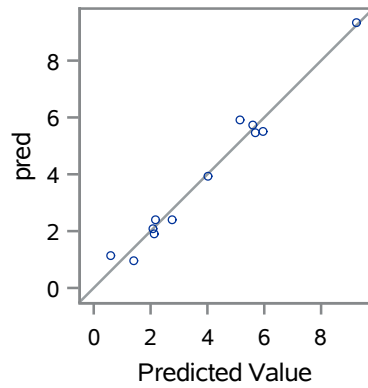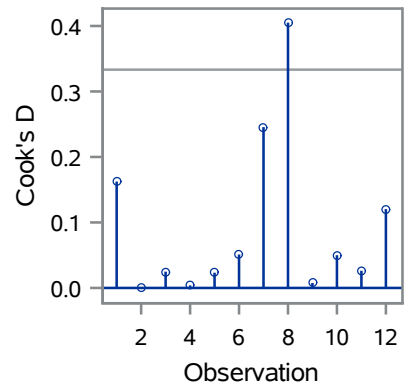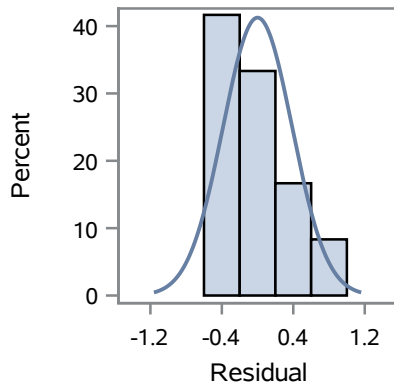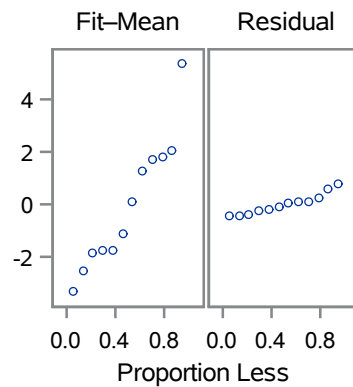

|              |        |
|--------------|--------|
| Observations | 12     |
| Parameters   | 2      |
| Error DF     | 10     |
| MSE          | 0.1646 |
| R-Square     | 0.9765 |
| Adj R-Square | 0.9741 |

The REG Procedure  
Model: MODEL1  
Dependent Variable: pred

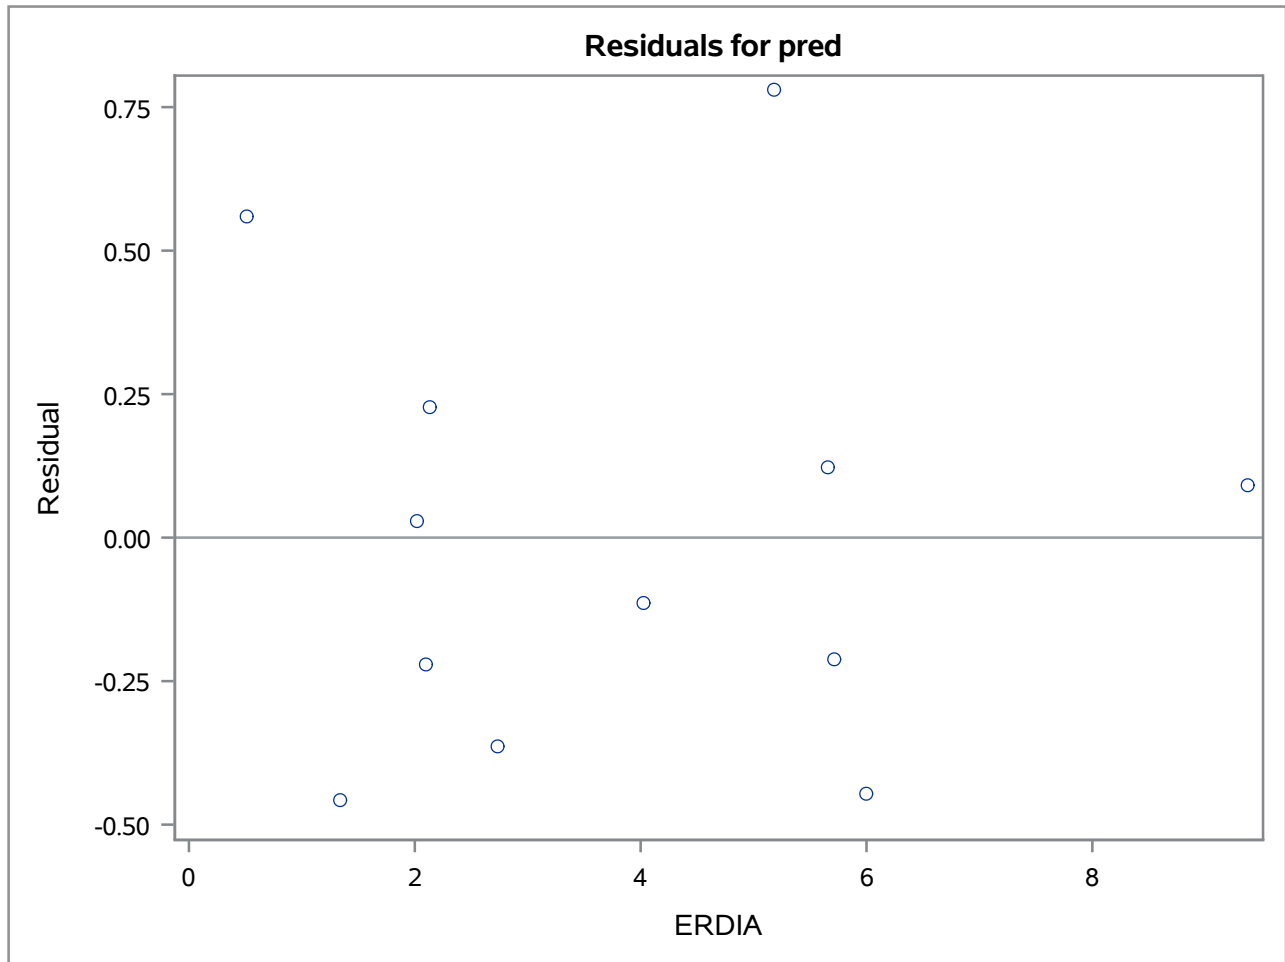

The REG Procedure  
Model: MODEL1  
Dependent Variable: pred

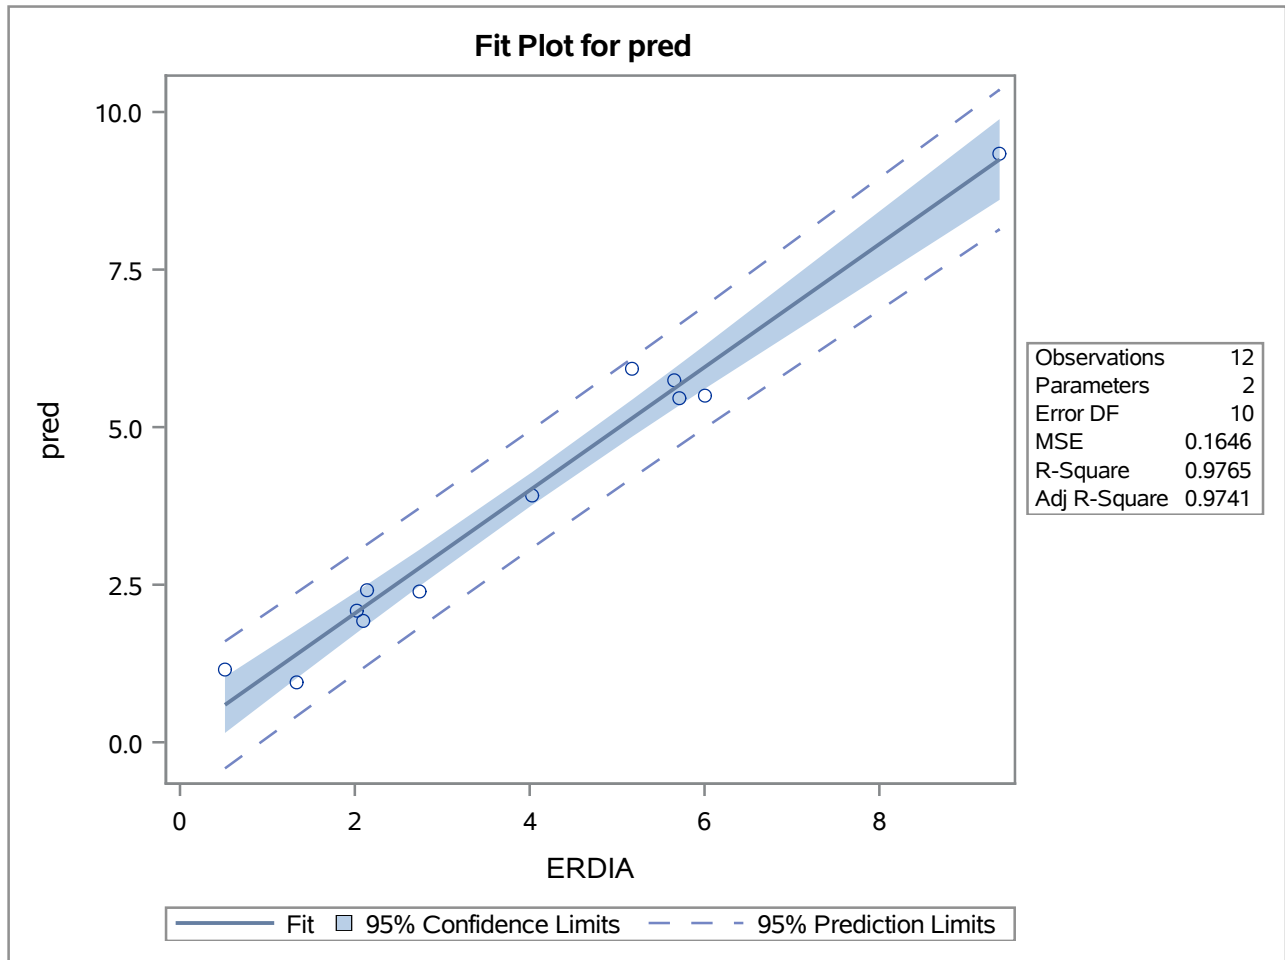

The MEANS Procedure

| Analysis Variable : MSE |           |           |           |           |
|-------------------------|-----------|-----------|-----------|-----------|
| N                       | Mean      | Std Dev   | Minimum   | Maximum   |
| 12                      | 0.1404297 | 0.1800978 | 0.0014393 | 0.5631554 |
