# Supplementary material for: Energy requirements for pregnant dairy cows
Source: PubMed Central journal article supplement (PMC7340303; doi:10.1371/journal.pone.0235619), 2020-07-07
Supplement: pone.0235619.s005.pdf [file pone.0235619.s005.pdf]

## The Mixed Procedure

| Model Information         |             |
|---------------------------|-------------|
| Data Set                  | WORK.IMPORT |
| Dependent Variable        | SALDO       |
| Covariance Structure      | Diagonal    |
| Estimation Method         | REML        |
| Residual Variance Method  | Profile     |
| Fixed Effects SE Method   | Model-Based |
| Degrees of Freedom Method | Residual    |

| Class Level Information |        |        |
|-------------------------|--------|--------|
| Class                   | Levels | Values |
| DIETA                   | 2      | 1 2    |

| Dimensions            |    |
|-----------------------|----|
| Covariance Parameters | 1  |
| Columns in X          | 9  |
| Columns in Z          | 0  |
| Subjects              | 1  |
| Max Obs per Subject   | 40 |

| Number of Observations          |    |
|---------------------------------|----|
| Number of Observations Read     | 67 |
| Number of Observations Used     | 40 |
| Number of Observations Not Used | 27 |

| Covariance Parameter Estimates |          |                |         |        |
|--------------------------------|----------|----------------|---------|--------|
| Cov Parm                       | Estimate | Standard Error | Z Value | Pr > Z |
| Residual                       | 104.61   | 25.3717        | 4.12    | <.0001 |

| Fit Statistics           |       |
|--------------------------|-------|
| -2 Res Log Likelihood    | 317.9 |
| AIC (Smaller is Better)  | 319.9 |
| AICC (Smaller is Better) | 320.0 |
| BIC (Smaller is Better)  | 321.4 |

**The Mixed Procedure**

| <b>Type 3 Tests of Fixed Effects</b> |                   |                   |                |                  |
|--------------------------------------|-------------------|-------------------|----------------|------------------|
| <b>Effect</b>                        | <b>Num<br/>DF</b> | <b>Den<br/>DF</b> | <b>F Value</b> | <b>Pr &gt; F</b> |
| <b>DIETA</b>                         | 1                 | 34                | 0.86           | 0.3607           |
| <b>GT</b>                            | 1                 | 34                | 1.93           | 0.1734           |
| <b>GT*DIETA</b>                      | 1                 | 34                | 1.03           | 0.3165           |
| <b>GT*GT</b>                         | 1                 | 34                | 6.85           | 0.0131           |
| <b>GT*GT*DIETA</b>                   | 1                 | 34                | 1.46           | 0.2345           |

**The NLIN Procedure  
Dependent Variable SALDO  
Method: Gauss-Newton**

| Iterative Phase |        |         |                |
|-----------------|--------|---------|----------------|
| Iter            | a      | b       | Sum of Squares |
| 0               | 1.7000 | 0.00530 | 60774.3        |
| 1               | 1.0047 | 0.00870 | 54898.0        |
| 2               | 0.4291 | 0.0161  | 24971.5        |
| 3               | 1.2068 | 0.0124  | 21757.8        |
| 4               | 1.3037 | 0.0155  | 10015.1        |
| 5               | 1.4500 | 0.0143  | 5477.8         |
| 6               | 1.4949 | 0.0141  | 5452.1         |
| 7               | 1.4927 | 0.0141  | 5452.1         |
| 8               | 1.4928 | 0.0141  | 5452.1         |

**Note:** Missing values were generated as a result of performing an operation on missing values. Each place is given by (number of times) AT (statement)/(line):(column).

|       |         |
|-------|---------|
| 13 AT | 1/82:16 |
|-------|---------|

|                                  |
|----------------------------------|
| NOTE: Convergence criterion met. |
|----------------------------------|

The NLIN Procedure  
 Dependent Variable SALDO  
 Method: Gauss-Newton

Fit Diagnostics for SALDO

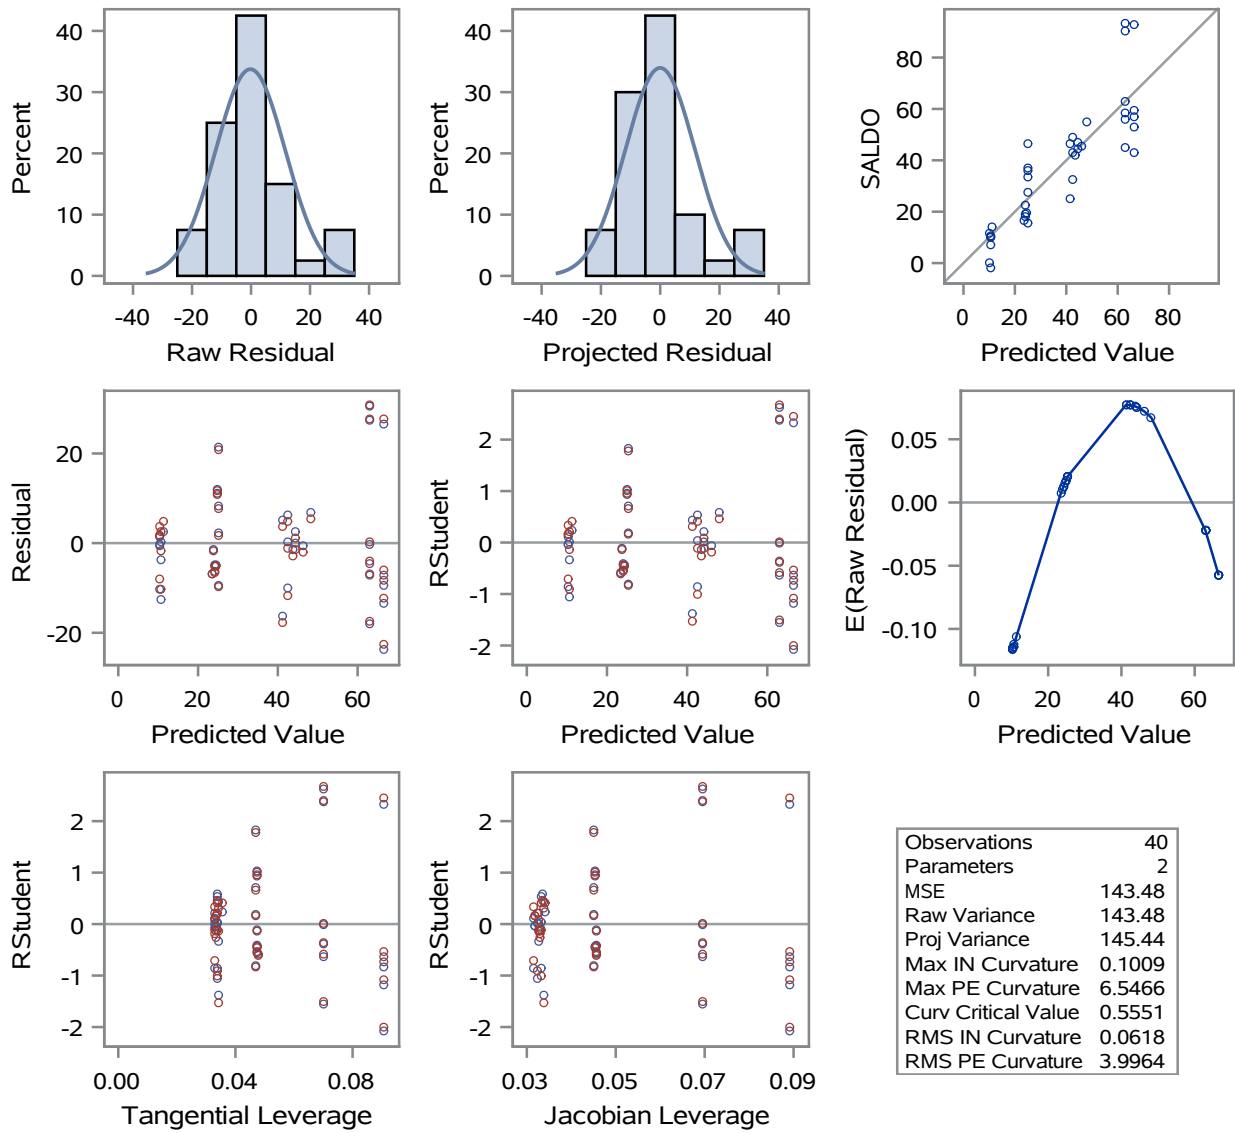

Residual: ○ Raw ○ Projected

The NLIN Procedure  
 Dependent Variable SALDO  
 Method: Gauss-Newton

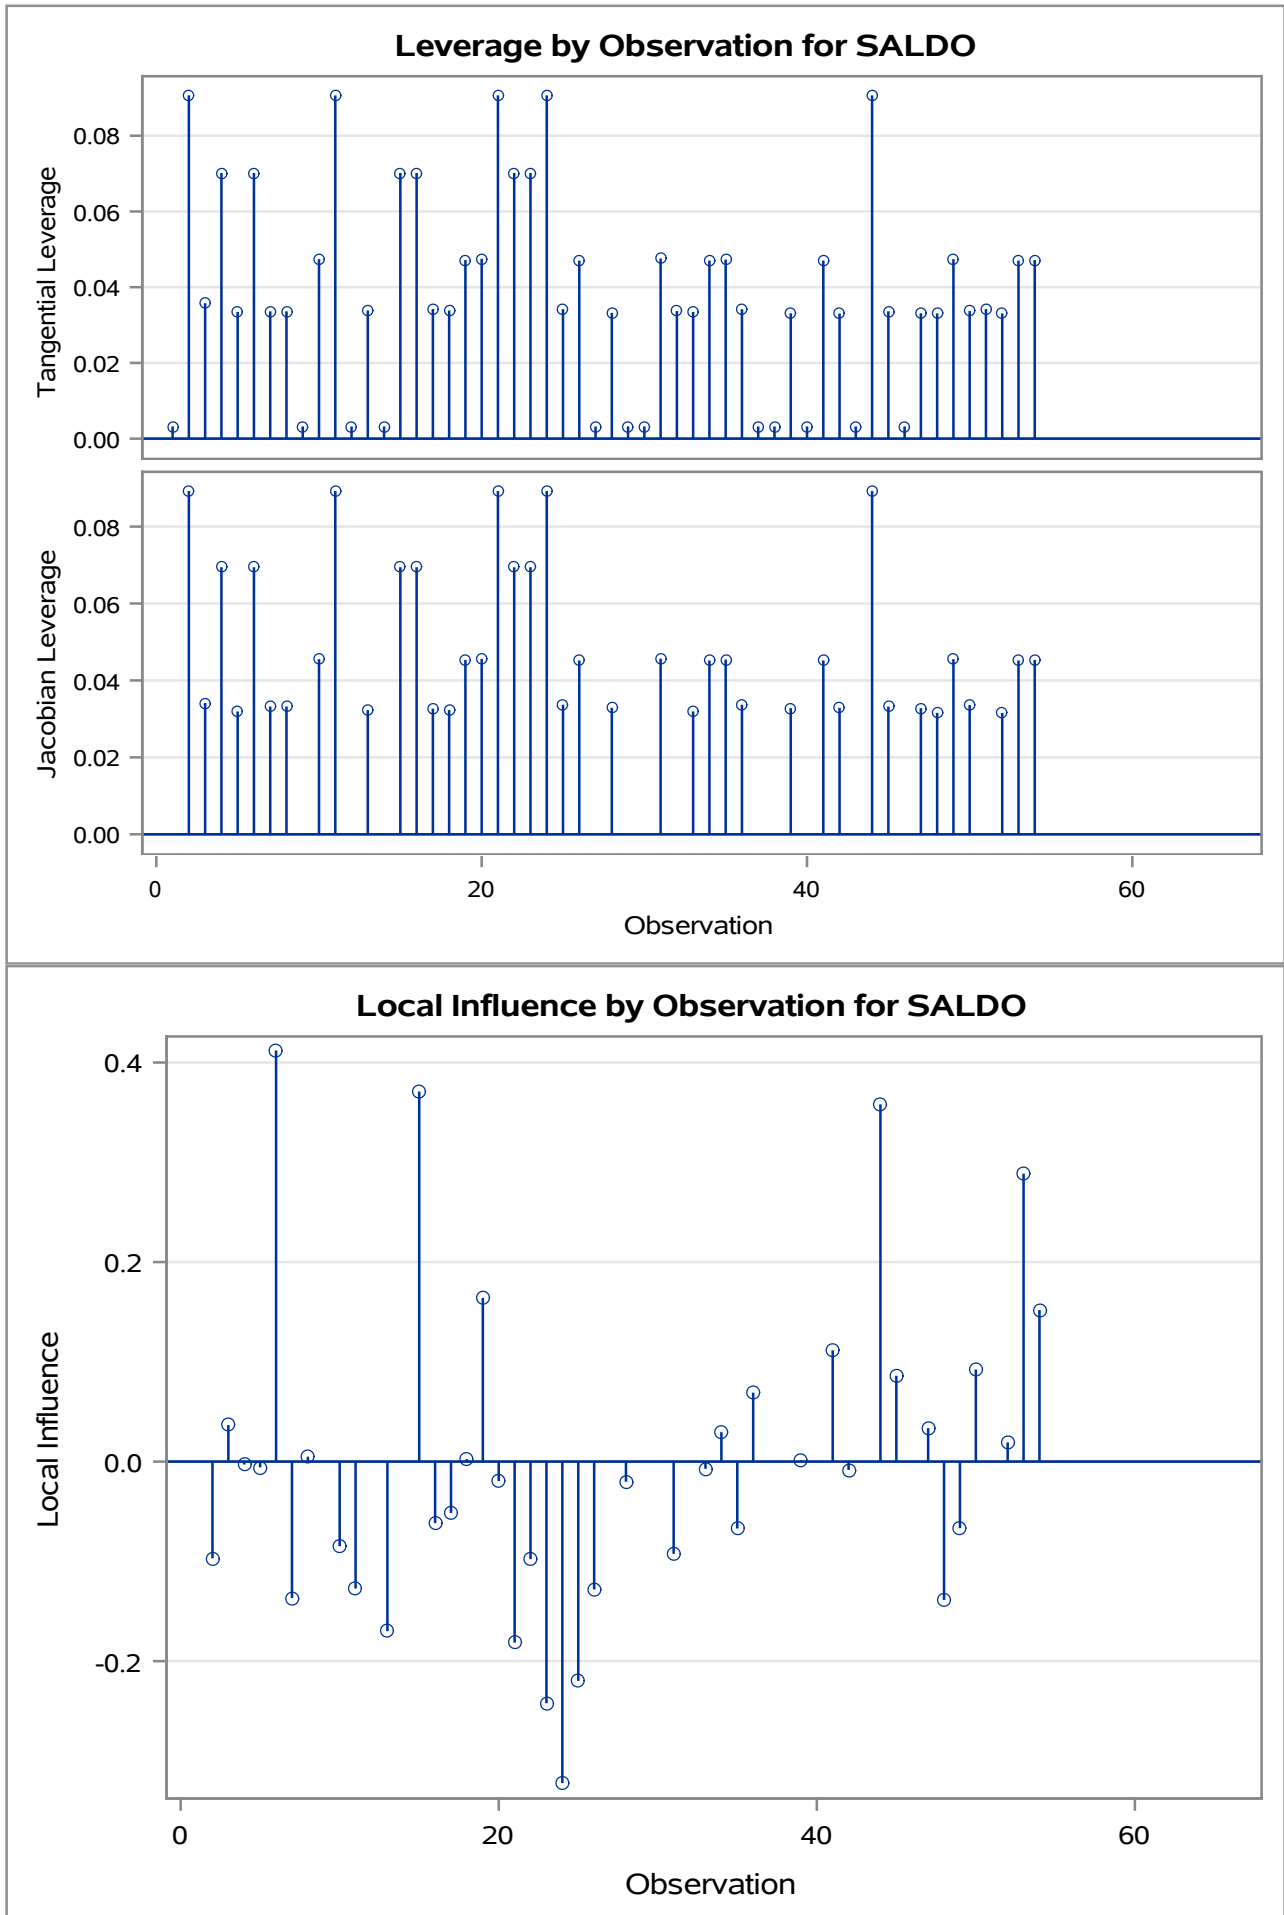

The NLIN Procedure

| Estimation Summary    |              |
|-----------------------|--------------|
| Method                | Gauss-Newton |
| Iterations            | 8            |
| Subiterations         | 4            |
| Average Subiterations | 0.5          |
| R                     | 1.585E-6     |
| PPC(a)                | 4.43E-6      |
| RPC(a)                | 0.00009      |
| Object                | 9.67E-10     |
| Objective             | 5452.056     |
| Observations Read     | 67           |
| Observations Used     | 40           |
| Observations Missing  | 27           |

Note: An intercept was not specified for this model.

| Source            | DF | Sum of Squares | Mean Square | F Value | Approx Pr > F |
|-------------------|----|----------------|-------------|---------|---------------|
| Model             | 2  | 72547.4        | 36273.7     | 252.82  | <.0001        |
| Error             | 38 | 5452.1         | 143.5       |         |               |
| Uncorrected Total | 40 | 77999.4        |             |         |               |

| Parameter | Estimate | Approx Std Error | Approximate 95% Confidence Limits |        |
|-----------|----------|------------------|-----------------------------------|--------|
|           |          |                  |                                   |        |
| a         | 1.4928   | 0.6805           | 0.1152                            | 2.8704 |
| b         | 0.0141   | 0.00179          | 0.0104                            | 0.0177 |

| Approximate Correlation Matrix |            |            |
|--------------------------------|------------|------------|
|                                | a          | b          |
| a                              | 1.0000000  | -0.9952300 |
| b                              | -0.9952300 | 1.0000000  |

The NLIN Procedure  
 Dependent Variable SALDO  
 Method: Gauss-Newton

| Iterative Phase |        |         |                |
|-----------------|--------|---------|----------------|
| Iter            | a      | b       | Sum of Squares |
| 0               | 1.7000 | 0.00530 | 28245.4        |
| 1               | 1.7816 | 0.00490 | 6587.4         |
| 2               | 1.8849 | 0.00473 | 5678.3         |
| 3               | 1.8799 | 0.00472 | 5674.4         |
| 4               | 1.8792 | 0.00472 | 5674.4         |
| 5               | 1.8793 | 0.00472 | 5674.4         |

Note: Missing values were generated as a result of performing an operation on missing values. Each place is given by (number of times) AT (statement)/(line):(column).

13 AT 1/88:16

NOTE: Convergence criterion met.

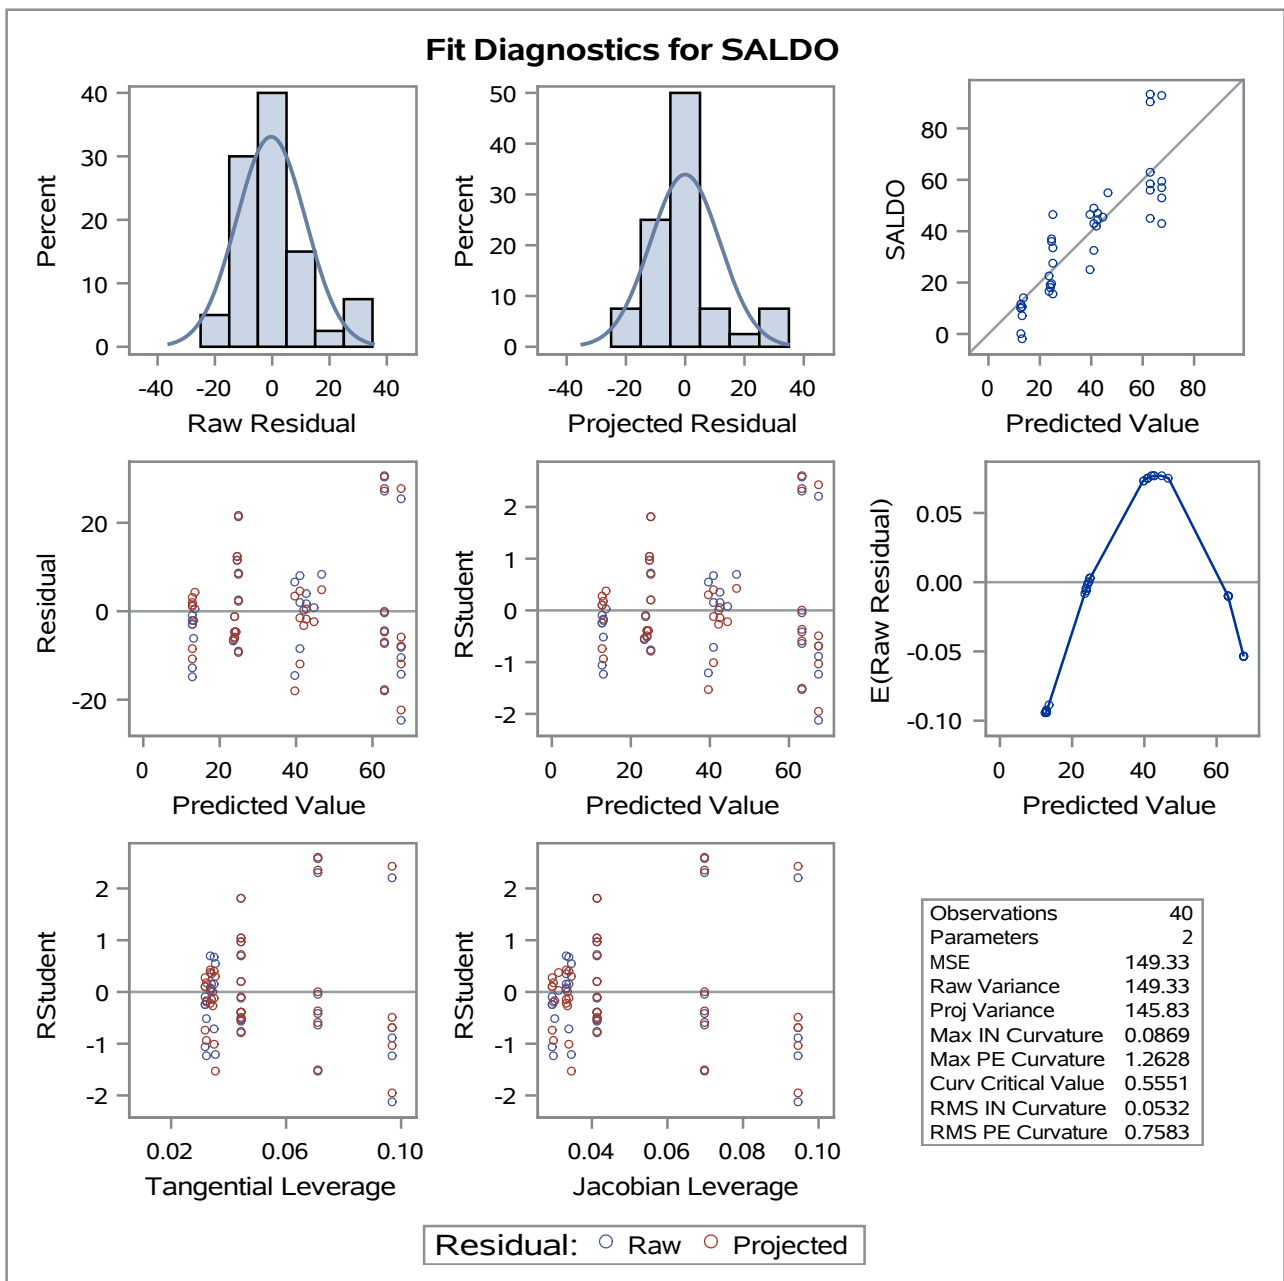

The NLIN Procedure  
 Dependent Variable SALDO  
 Method: Gauss-Newton

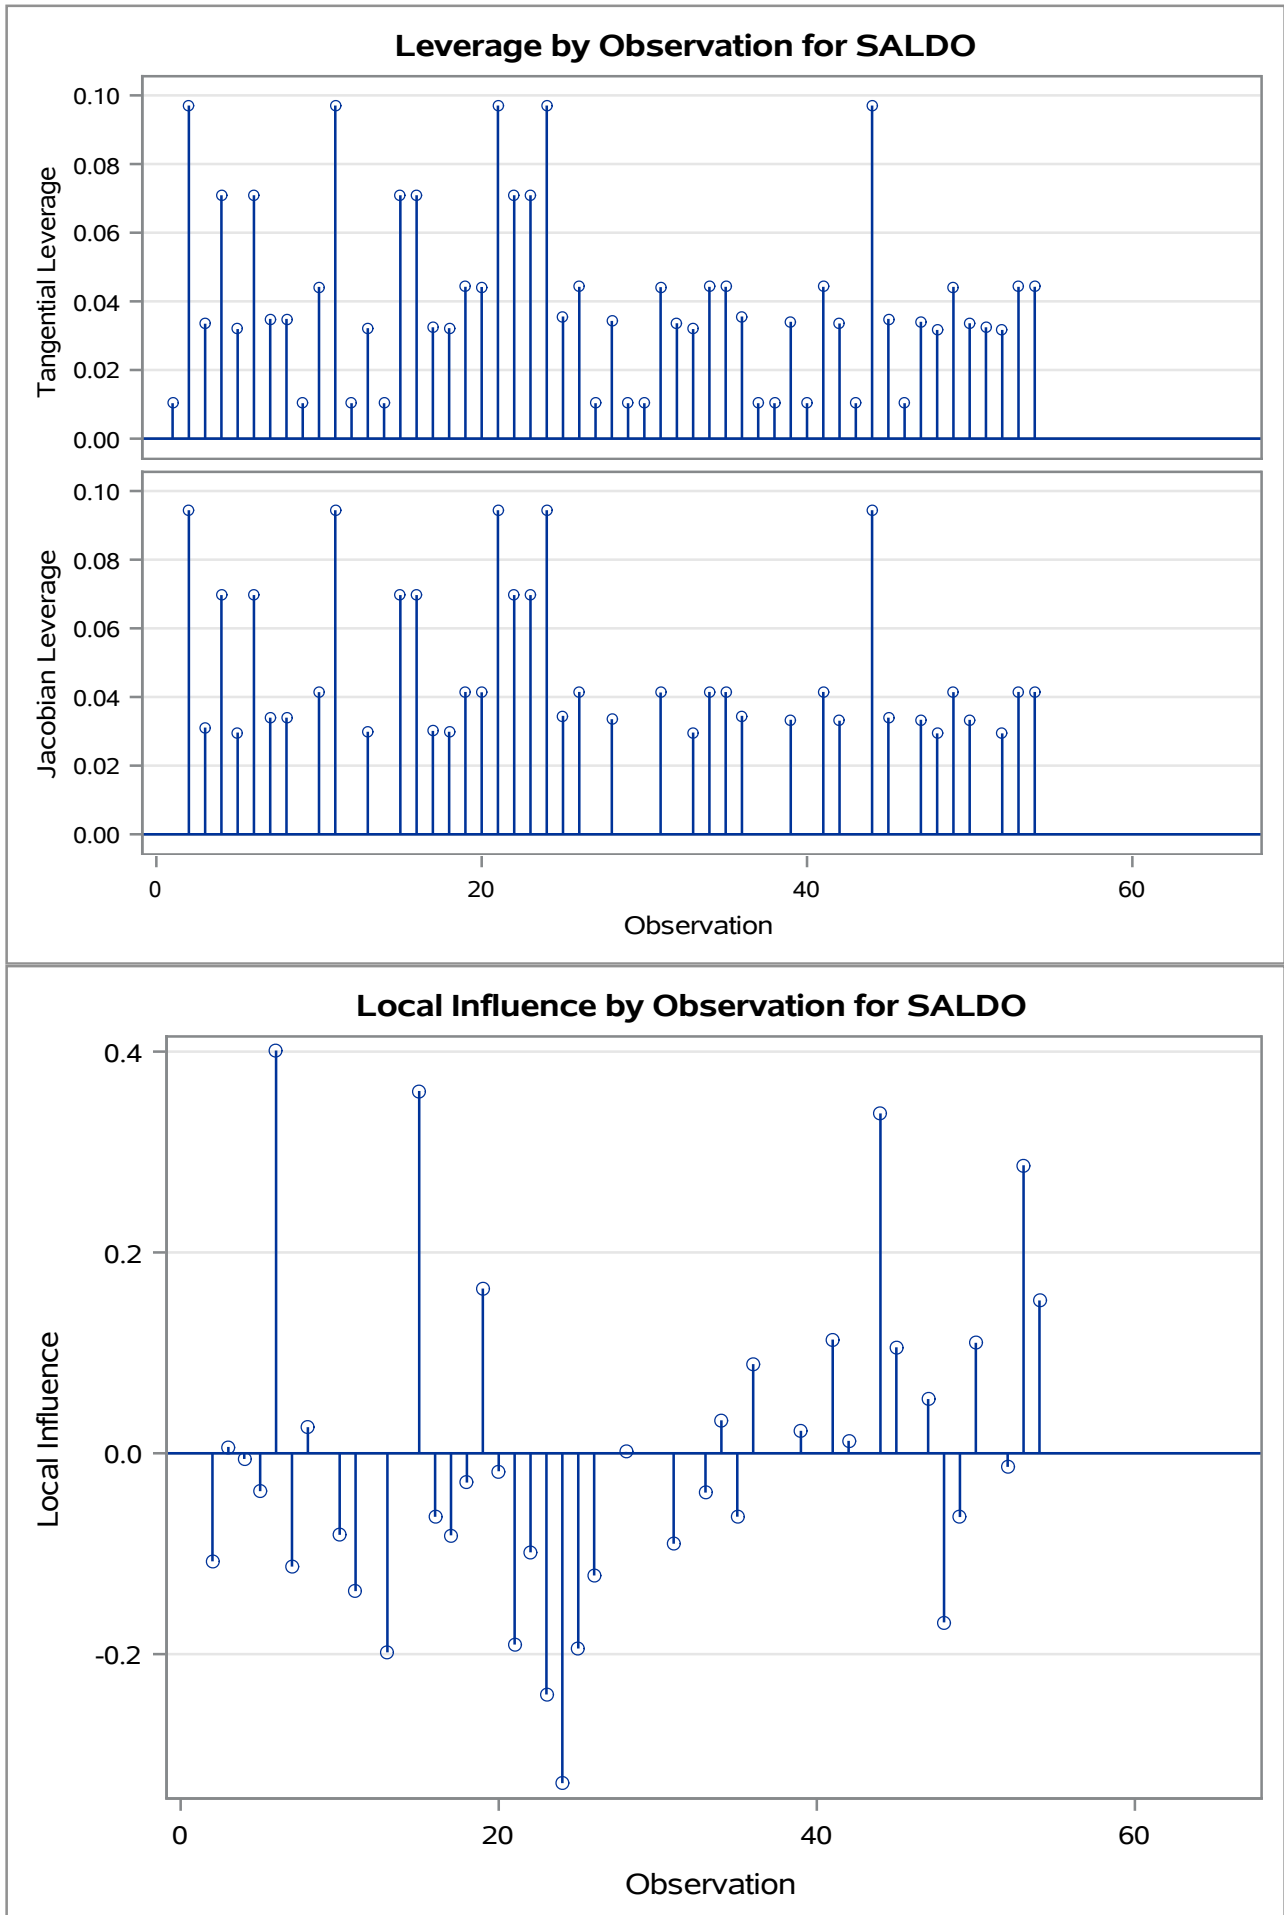



## The NLIN Procedure

| Estimation Summary   |              |
|----------------------|--------------|
| Method               | Gauss-Newton |
| Iterations           | 5            |
| R                    | 1.675E-6     |
| PPC(a)               | 2.466E-6     |
| RPC(a)               | 0.000029     |
| Object               | 3.65E-10     |
| Objective            | 5674.369     |
| Observations Read    | 67           |
| Observations Used    | 40           |
| Observations Missing | 27           |

Note: An intercept was not specified for this model.

| Source            | DF | Sum of Squares | Mean Square | F Value | Approx Pr > F |
|-------------------|----|----------------|-------------|---------|---------------|
| Model             | 2  | 72325.1        | 36162.5     | 242.17  | <.0001        |
| Error             | 38 | 5674.4         | 149.3       |         |               |
| Uncorrected Total | 40 | 77999.4        |             |         |               |

| Parameter | Estimate | Approx Std Error | Approximate 95% Confidence Limits |         |
|-----------|----------|------------------|-----------------------------------|---------|
|           |          |                  |                                   |         |
| a         | 1.8793   | 0.4569           | 0.9543                            | 2.8043  |
| b         | 0.00472  | 0.000282         | 0.00415                           | 0.00529 |

| Approximate Correlation Matrix |            |            |
|--------------------------------|------------|------------|
|                                | a          | b          |
| a                              | 1.0000000  | -0.9823820 |
| b                              | -0.9823820 | 1.0000000  |

**exp x exp testando ad libitum vs mantença EXP SIMPLES**

**The NLMIXED Procedure**

| Specifications                      |                   |
|-------------------------------------|-------------------|
| Data Set                            | WORK.IMPORT       |
| Dependent Variable                  | SALDO             |
| Distribution for Dependent Variable | Normal            |
| Optimization Technique              | Dual Quasi-Newton |
| Integration Method                  | None              |

| Dimensions            |    |
|-----------------------|----|
| Observations Used     | 40 |
| Observations Not Used | 27 |
| Total Observations    | 67 |
| Parameters            | 5  |

| Initial Parameters |       |      |       |     |                         |
|--------------------|-------|------|-------|-----|-------------------------|
| a1                 | b1    | a2   | b2    | S2  | Negative Log Likelihood |
| 1.05               | 0.016 | 1.05 | 0.016 | 363 | 164.646923              |

| Iteration History |       |                         |            |                  |          |
|-------------------|-------|-------------------------|------------|------------------|----------|
| Iteration         | Calls | Negative Log Likelihood | Difference | Maximum Gradient | Slope    |
| 1                 | 10    | 160.1096                | 4.537315   | 1776.84          | -954518  |
| 2                 | 17    | 160.1096                | 0.000032   | 1777.61          | -4.59836 |
| 3                 | 21    | 159.7874                | 0.322177   | 621.685          | -0.46863 |
| 4                 | 23    | 159.7478                | 0.039574   | 114.400          | -0.09117 |
| 5                 | 27    | 159.7451                | 0.002748   | 90.3173          | -0.00334 |
| 6                 | 31    | 159.7266                | 0.018495   | 298.906          | -0.00271 |
| 7                 | 35    | 159.6931                | 0.033457   | 626.081          | -0.02917 |
| 8                 | 38    | 159.6739                | 0.019256   | 107.011          | -0.04823 |
| 9                 | 41    | 159.6612                | 0.01268    | 177.235          | -0.00959 |
| 10                | 44    | 159.6560                | 0.005193   | 60.3519          | -0.00586 |
| 11                | 47    | 159.6555                | 0.000542   | 11.5033          | -0.00075 |
| 12                | 50    | 159.6554                | 0.000067   | 7.35558          | -0.00009 |
| 13                | 52    | 159.6553                | 0.000062   | 21.7703          | -0.00008 |
| 14                | 56    | 159.6549                | 0.000456   | 44.6730          | -0.00011 |
| 15                | 60    | 159.6484                | 0.006515   | 65.2169          | -0.00077 |
| 16                | 63    | 159.6473                | 0.001062   | 41.1439          | -0.00246 |
| 17                | 66    | 159.6468                | 0.000516   | 14.2958          | -0.00087 |
| 18                | 69    | 159.6467                | 0.000087   | 7.00141          | -0.00011 |

**exp x exp testando ad libitum vs mantença EXP SIMPLES****The NLMIXED Procedure**

| Iteration History |       |                         |            |                  |          |
|-------------------|-------|-------------------------|------------|------------------|----------|
| Iteration         | Calls | Negative Log Likelihood | Difference | Maximum Gradient | Slope    |
| 19                | 73    | 159.6465                | 0.00022    | 20.0753          | -0.00014 |
| 20                | 77    | 159.6445                | 0.00197    | 107.248          | -0.00028 |
| 21                | 81    | 159.6339                | 0.010599   | 269.561          | -0.00297 |
| 22                | 85    | 159.6010                | 0.032899   | 283.581          | -0.06503 |
| 23                | 92    | 159.4020                | 0.199022   | 1236.86          | -0.04524 |
| 24                | 99    | 158.5751                | 0.826831   | 2402.40          | -0.43373 |
| 25                | 101   | 157.3129                | 1.262245   | 3073.78          | -7.73699 |
| 26                | 103   | 153.5467                | 3.766167   | 2018.95          | -53.8912 |
| 27                | 109   | 152.5980                | 0.948749   | 1476.43          | -11.7065 |
| 28                | 112   | 152.4899                | 0.108085   | 628.079          | -0.33999 |
| 29                | 115   | 152.4353                | 0.054611   | 632.528          | -0.05951 |
| 30                | 119   | 151.8816                | 0.553738   | 2094.06          | -0.14397 |
| 31                | 123   | 151.2319                | 0.649668   | 5421.13          | -1.57961 |
| 32                | 126   | 150.8868                | 0.345057   | 4255.88          | -3.59371 |
| 33                | 128   | 150.3388                | 0.54801    | 2028.89          | -3.71084 |
| 34                | 130   | 149.5470                | 0.791836   | 3094.27          | -0.96029 |
| 35                | 132   | 148.8402                | 0.706789   | 2460.95          | -1.91024 |
| 36                | 137   | 148.5301                | 0.310065   | 966.637          | -2.51636 |
| 37                | 139   | 148.3410                | 0.189084   | 1968.20          | -0.57389 |
| 38                | 142   | 148.2629                | 0.078113   | 1010.41          | -0.29450 |
| 39                | 146   | 148.0631                | 0.199843   | 240.578          | -0.29106 |
| 40                | 148   | 147.9444                | 0.118719   | 2943.91          | -0.18751 |
| 41                | 152   | 147.6637                | 0.280648   | 340.418          | -0.83106 |
| 42                | 154   | 147.3784                | 0.285335   | 2943.41          | -0.24647 |
| 43                | 157   | 147.2991                | 0.079246   | 1071.62          | -0.37998 |
| 44                | 159   | 147.2228                | 0.076313   | 497.282          | -0.13198 |
| 45                | 161   | 147.1710                | 0.051792   | 1998.55          | -0.12693 |
| 46                | 163   | 147.1106                | 0.06043    | 475.827          | -0.17354 |
| 47                | 165   | 147.0513                | 0.059335   | 153.082          | -0.03031 |
| 48                | 168   | 147.0386                | 0.012709   | 298.968          | -0.02697 |
| 49                | 171   | 147.0336                | 0.004966   | 471.129          | -0.01145 |
| 50                | 175   | 147.0135                | 0.020122   | 864.457          | -0.01146 |
| 51                | 178   | 147.0029                | 0.010555   | 560.892          | -0.03109 |
| 52                | 180   | 146.9922                | 0.010764   | 387.043          | -0.01578 |
| 53                | 182   | 146.9731                | 0.019068   | 214.969          | -0.02076 |
| 54                | 185   | 146.9674                | 0.005641   | 42.7898          | -0.01762 |
| 55                | 188   | 146.9656                | 0.00186    | 99.3692          | -0.00362 |

exp x exp testando ad libitum vs mantença EXP SIMPLES

The NLMIXED Procedure

| Iteration History |       |                         |            |                  |          |
|-------------------|-------|-------------------------|------------|------------------|----------|
| Iteration         | Calls | Negative Log Likelihood | Difference | Maximum Gradient | Slope    |
| 56                | 191   | 146.9649                | 0.000637   | 39.4110          | -0.00057 |
| 57                | 194   | 146.9649                | 0.000091   | 2.90577          | -0.00018 |
| 58                | 197   | 146.9649                | 3.97E-6    | 3.69359          | -7.1E-6  |
| 59                | 200   | 146.9649                | 4.034E-7   | 0.38249          | -6.61E-7 |

NOTE: GCONV convergence criterion satisfied.

| Fit Statistics           |       |
|--------------------------|-------|
| -2 Log Likelihood        | 293.9 |
| AIC (smaller is better)  | 303.9 |
| AICC (smaller is better) | 305.7 |
| BIC (smaller is better)  | 312.4 |

| Parameter Estimates |          |                |    |         |         |                       |         |          |
|---------------------|----------|----------------|----|---------|---------|-----------------------|---------|----------|
| Parameter           | Estimate | Standard Error | DF | t Value | Pr >  t | 95% Confidence Limits |         | Gradient |
| a1                  | 1.4697   | 0.7837         | 40 | 1.88    | 0.0681  | -0.1142               | 3.0536  | 0.000572 |
| b1                  | 0.01353  | 0.002096       | 40 | 6.46    | <.0001  | 0.009298              | 0.01777 | 0.22952  |
| a2                  | 1.4150   | 0.6643         | 40 | 2.13    | 0.0394  | 0.07236               | 2.7577  | 0.001028 |
| b2                  | 0.01492  | 0.001845       | 40 | 8.09    | <.0001  | 0.01119               | 0.01865 | 0.38249  |
| S2                  | 90.9540  | 20.3442        | 40 | 4.47    | <.0001  | 49.8368               | 132.07  | -2.69E-6 |

| Correlation Matrix of Parameter Estimates |         |         |         |         |         |
|-------------------------------------------|---------|---------|---------|---------|---------|
|                                           | a1      | b1      | a2      | b2      | S2      |
| a1                                        | 1.0000  | -0.9947 | 0.0003  | -0.0003 | -0.0152 |
| b1                                        | -0.9947 | 1.0000  | -0.0003 | 0.0003  | 0.0153  |
| a2                                        | 0.0003  | -0.0003 | 1.0000  | -0.9953 | -0.0198 |
| b2                                        | -0.0003 | 0.0003  | -0.9953 | 1.0000  | 0.0198  |
| S2                                        | -0.0152 | 0.0153  | -0.0198 | 0.0198  | 1.0000  |

| Additional Estimates |          |                |    |         |         |       |          |          |
|----------------------|----------|----------------|----|---------|---------|-------|----------|----------|
| Label                | Estimate | Standard Error | DF | t Value | Pr >  t | Alpha | Lower    | Upper    |
| La1-Ma2              | 0.05468  | 1.0272         | 40 | 0.05    | 0.9578  | 0.05  | -2.0214  | 2.1308   |
| Lb1-Mb2              | -0.00139 | 0.002792       | 40 | -0.50   | 0.6216  | 0.05  | -0.00703 | 0.004253 |

**exp x exp testando ad libitum vs mantença EXP SIMPLES****The NLMIXED Procedure**

| Correlation Matrix of Additional Estimates |         |         |
|--------------------------------------------|---------|---------|
| Label                                      | Corr1   | Corr2   |
| La1-Ma2                                    | 1.0000  | -0.9948 |
| Lb1-Mb2                                    | -0.9948 | 1.0000  |

**exp x exp testando ad libitum vs mantença DUPLO EXP**

**The NLMIXED Procedure**

| Specifications                      |                   |
|-------------------------------------|-------------------|
| Data Set                            | WORK.IMPORT       |
| Dependent Variable                  | SALDO             |
| Distribution for Dependent Variable | Normal            |
| Optimization Technique              | Dual Quasi-Newton |
| Integration Method                  | None              |

| Dimensions            |    |
|-----------------------|----|
| Observations Used     | 40 |
| Observations Not Used | 27 |
| Total Observations    | 67 |
| Parameters            | 5  |

| Initial Parameters |        |        |        |     |                         |
|--------------------|--------|--------|--------|-----|-------------------------|
| a1                 | b1     | a2     | b2     | S2  | Negative Log Likelihood |
| 1.9303             | 0.0051 | 1.9303 | 0.0051 | 363 | 182.349106              |

| Iteration History |       |                         |            |                  |          |
|-------------------|-------|-------------------------|------------|------------------|----------|
| Iteration         | Calls | Negative Log Likelihood | Difference | Maximum Gradient | Slope    |
| 1                 | 20    | 166.1354                | 16.21375   | 13294.6          | -9.516E7 |
| 2                 | 29    | 165.7967                | 0.338681   | 13153.2          | -497212  |
| 3                 | 33    | 162.0759                | 3.720801   | 15517.8          | -2.59522 |
| 4                 | 35    | 160.4310                | 1.644859   | 6389.59          | -2.56219 |
| 5                 | 37    | 160.2078                | 0.223242   | 6708.00          | -1.43400 |
| 6                 | 39    | 159.9746                | 0.233195   | 967.693          | -0.56399 |
| 7                 | 42    | 159.9694                | 0.005217   | 131.763          | -0.00948 |
| 8                 | 45    | 159.9682                | 0.001188   | 191.773          | -0.00112 |
| 9                 | 49    | 159.9477                | 0.020457   | 877.473          | -0.00183 |
| 10                | 52    | 159.9335                | 0.014237   | 394.515          | -0.02462 |
| 11                | 55    | 159.9316                | 0.001899   | 32.7448          | -0.00376 |
| 12                | 58    | 159.9315                | 0.000037   | 16.7677          | -0.00005 |
| 13                | 64    | 159.9289                | 0.002691   | 566.044          | -0.00003 |
| 14                | 68    | 159.9207                | 0.008143   | 106.561          | -0.00397 |
| 15                | 71    | 159.9202                | 0.000499   | 122.241          | -0.00051 |
| 16                | 75    | 159.9147                | 0.00549    | 416.512          | -0.00046 |
| 17                | 81    | 159.7048                | 0.209954   | 2973.58          | -0.01178 |
| 18                | 85    | 158.4640                | 1.240736   | 4629.57          | -1.03360 |

**exp x exp testando ad libitum vs mantença DUPLO EXP**

**The NLMIXED Procedure**

| Iteration History |       |                         |            |                  |          |
|-------------------|-------|-------------------------|------------|------------------|----------|
| Iteration         | Calls | Negative Log Likelihood | Difference | Maximum Gradient | Slope    |
| 19                | 92    | 154.5438                | 3.92025    | 8229.04          | -2.63238 |
| 20                | 98    | 153.7036                | 0.840204   | 7786.08          | -5.85993 |
| 21                | 100   | 153.0672                | 0.636379   | 22865.5          | -4.01095 |
| 22                | 104   | 151.4409                | 1.626317   | 23170.8          | -5.57651 |
| 23                | 106   | 150.1386                | 1.302262   | 27451.2          | -10.3811 |
| 24                | 108   | 148.7337                | 1.404901   | 5631.92          | -4.19328 |
| 25                | 113   | 148.5867                | 0.147037   | 887.456          | -0.78659 |
| 26                | 117   | 148.1426                | 0.444099   | 2742.53          | -1.54243 |
| 27                | 120   | 148.0620                | 0.080555   | 344.610          | -0.24130 |
| 28                | 123   | 148.0416                | 0.020455   | 396.578          | -0.05593 |
| 29                | 126   | 148.0391                | 0.002449   | 139.901          | -0.00529 |
| 30                | 129   | 148.0391                | 0.000054   | 18.7339          | -0.00012 |
| 31                | 132   | 148.0391                | 1.333E-6   | 1.61439          | -2.78E-6 |
| 32                | 135   | 148.0391                | 9.329E-9   | 0.10833          | -1.77E-8 |

NOTE: GCONV convergence criterion satisfied.

| Fit Statistics           |       |
|--------------------------|-------|
| -2 Log Likelihood        | 296.1 |
| AIC (smaller is better)  | 306.1 |
| AICC (smaller is better) | 307.8 |
| BIC (smaller is better)  | 314.5 |

| Parameter Estimates |          |                |    |         |         |                       |          |          |
|---------------------|----------|----------------|----|---------|---------|-----------------------|----------|----------|
| Parameter           | Estimate | Standard Error | DF | t Value | Pr >  t | 95% Confidence Limits |          | Gradient |
| a1                  | 1.7416   | 0.4869         | 40 | 3.58    | 0.0009  | 0.7575                | 2.7257   | -0.00008 |
| b1                  | 0.004636 | 0.000329       | 40 | 14.08   | <.0001  | 0.003970              | 0.005301 | -0.10833 |
| a2                  | 1.9888   | 0.4751         | 40 | 4.19    | 0.0002  | 1.0287                | 2.9490   | -0.00002 |
| b2                  | 0.004850 | 0.000265       | 40 | 18.27   | <.0001  | 0.004313              | 0.005386 | -0.03948 |
| S2                  | 95.9735  | 21.4792        | 40 | 4.47    | <.0001  | 52.5625               | 139.38   | -9.7E-7  |

**exp x exp testando ad libitum vs mantença DUPLO EXP**

**The NLMIXED Procedure**

| Correlation Matrix of Parameter Estimates |         |         |         |         |         |
|-------------------------------------------|---------|---------|---------|---------|---------|
|                                           | a1      | b1      | a2      | b2      | S2      |
| a1                                        | 1.0000  | -0.9792 | 0.0008  | -0.0008 | -0.0245 |
| b1                                        | -0.9792 | 1.0000  | -0.0008 | 0.0008  | 0.0250  |
| a2                                        | 0.0008  | -0.0008 | 1.0000  | -0.9808 | -0.0329 |
| b2                                        | -0.0008 | 0.0008  | -0.9808 | 1.0000  | 0.0335  |
| S2                                        | -0.0245 | 0.0250  | -0.0329 | 0.0335  | 1.0000  |

| Additional Estimates |          |                |    |         |         |       |          |          |
|----------------------|----------|----------------|----|---------|---------|-------|----------|----------|
| Label                | Estimate | Standard Error | DF | t Value | Pr >  t | Alpha | Lower    | Upper    |
| <b>La1-Ma2</b>       | -0.2472  | 0.6800         | 40 | -0.36   | 0.7181  | 0.05  | -1.6216  | 1.1271   |
| <b>Lb1-Mb2</b>       | -0.00021 | 0.000423       | 40 | -0.51   | 0.6151  | 0.05  | -0.00107 | 0.000640 |

| Correlation Matrix of Additional Estimates |         |         |
|--------------------------------------------|---------|---------|
| Label                                      | Corr1   | Corr2   |
| <b>La1-Ma2</b>                             | 1.0000  | -0.9756 |
| <b>Lb1-Mb2</b>                             | -0.9756 | 1.0000  |



**EXP SIMPLES modelo reduzido****The NLMIXED Procedure**

| Specifications                      |                   |
|-------------------------------------|-------------------|
| Data Set                            | WORK.IMPORT       |
| Dependent Variable                  | SALDO             |
| Distribution for Dependent Variable | Normal            |
| Optimization Technique              | Dual Quasi-Newton |
| Integration Method                  | None              |

| Dimensions            |    |
|-----------------------|----|
| Observations Used     | 40 |
| Observations Not Used | 27 |
| Total Observations    | 67 |
| Parameters            | 3  |

| Initial Parameters |       |     |                         |
|--------------------|-------|-----|-------------------------|
| a                  | b     | S2  | Negative Log Likelihood |
| 1.05               | 0.016 | 363 | 164.646923              |

| Iteration History |       |                         |            |                  |          |
|-------------------|-------|-------------------------|------------|------------------|----------|
| Iteration         | Calls | Negative Log Likelihood | Difference | Maximum Gradient | Slope    |
| 1                 | 15    | 162.5699                | 2.076991   | 2636.00          | -824647  |
| 2                 | 17    | 162.2792                | 0.290714   | 573.760          | -0.46846 |
| 3                 | 19    | 162.2621                | 0.0171     | 70.2499          | -0.03333 |
| 4                 | 26    | 162.1904                | 0.071721   | 261.689          | -0.00370 |
| 5                 | 28    | 162.1781                | 0.012292   | 589.326          | -0.02822 |
| 6                 | 30    | 162.1610                | 0.017142   | 17.7545          | -0.02329 |
| 7                 | 35    | 162.1556                | 0.005386   | 179.693          | -0.00709 |
| 8                 | 38    | 162.1544                | 0.001138   | 2.27803          | -0.00264 |
| 9                 | 41    | 162.1543                | 0.000156   | 5.91290          | -0.00019 |
| 10                | 44    | 162.1543                | 0.000029   | 11.6563          | -0.00002 |
| 11                | 50    | 162.1519                | 0.002393   | 72.9281          | -0.00003 |
| 12                | 59    | 161.9923                | 0.159573   | 319.323          | -0.00580 |
| 13                | 61    | 161.8466                | 0.145733   | 2058.84          | -0.18168 |
| 14                | 65    | 160.9691                | 0.877443   | 4716.47          | -2.64664 |
| 15                | 67    | 159.5009                | 1.468245   | 70.9242          | -6.72422 |
| 16                | 73    | 159.1963                | 0.304593   | 439.470          | -0.84912 |
| 17                | 76    | 159.1359                | 0.060376   | 1734.25          | -0.06052 |
| 18                | 80    | 158.5541                | 0.581806   | 3453.43          | -0.15085 |

## EXP SIMPLES modelo reduzido

### The NLMIXED Procedure

| Iteration History |       |                         |            |                  |          |
|-------------------|-------|-------------------------|------------|------------------|----------|
| Iteration         | Calls | Negative Log Likelihood | Difference | Maximum Gradient | Slope    |
| 19                | 85    | 156.9758                | 1.57833    | 2660.19          | -3.78912 |
| 20                | 91    | 156.6216                | 0.354133   | 5229.34          | -2.93134 |
| 21                | 93    | 156.4121                | 0.209522   | 1460.63          | -1.95557 |
| 22                | 95    | 156.0439                | 0.368178   | 3456.34          | -0.34919 |
| 23                | 98    | 155.8175                | 0.226399   | 4027.67          | -0.31767 |
| 24                | 100   | 155.4601                | 0.357467   | 1126.80          | -0.63767 |
| 25                | 105   | 155.2650                | 0.195085   | 2136.15          | -0.38204 |
| 26                | 107   | 155.1307                | 0.134279   | 587.072          | -0.26253 |
| 27                | 112   | 155.1115                | 0.01916    | 1415.26          | -0.15911 |
| 28                | 116   | 155.0615                | 0.050073   | 296.482          | -0.12318 |
| 29                | 119   | 155.0555                | 0.005996   | 124.654          | -0.00445 |
| 30                | 122   | 155.0549                | 0.000543   | 6.01481          | -0.00113 |
| 31                | 125   | 155.0549                | 0.000011   | 0.31519          | -0.00002 |
| 32                | 128   | 155.0549                | 1.059E-7   | 0.52862          | -2.67E-7 |

NOTE: GCONV convergence criterion satisfied.

| Fit Statistics           |       |
|--------------------------|-------|
| -2 Log Likelihood        | 310.1 |
| AIC (smaller is better)  | 316.1 |
| AICC (smaller is better) | 316.8 |
| BIC (smaller is better)  | 321.2 |

| Parameter Estimates |          |                |    |         |         |                       |         |          |
|---------------------|----------|----------------|----|---------|---------|-----------------------|---------|----------|
| Parameter           | Estimate | Standard Error | DF | t Value | Pr >  t | 95% Confidence Limits |         | Gradient |
| a                   | 1.4929   | 0.6475         | 40 | 2.31    | 0.0264  | 0.1842                | 2.8015  | 0.001495 |
| b                   | 0.01406  | 0.001705       | 40 | 8.25    | <.0001  | 0.01062               | 0.01751 | 0.52862  |
| S2                  | 136.30   | 30.4847        | 40 | 4.47    | <.0001  | 74.6906               | 197.91  | 1.093E-6 |

| Correlation Matrix of Parameter Estimates |         |         |         |
|-------------------------------------------|---------|---------|---------|
|                                           | a       | b       | S2      |
| a                                         | 1.0000  | -0.9950 | -0.0199 |
| b                                         | -0.9950 | 1.0000  | 0.0200  |
| S2                                        | -0.0199 | 0.0200  | 1.0000  |

### EXP SIMPLES modelo reduzido

The REG Procedure  
 Model: MODEL1  
 Dependent Variable: Pred Predicted Value

|                                            |    |
|--------------------------------------------|----|
| Number of Observations Read                | 67 |
| Number of Observations Used                | 40 |
| Number of Observations with Missing Values | 27 |

| Analysis of Variance |    |                |             |         |        |
|----------------------|----|----------------|-------------|---------|--------|
| Source               | DF | Sum of Squares | Mean Square | F Value | Pr > F |
| Model                | 1  | 12206          | 12206       | 117.37  | <.0001 |
| Error                | 38 | 3951.61647     | 103.98991   |         |        |
| Corrected Total      | 39 | 16157          |             |         |        |

|                |          |          |        |
|----------------|----------|----------|--------|
| Root MSE       | 10.19754 | R-Square | 0.7554 |
| Dependent Mean | 37.54691 | Adj R-Sq | 0.7490 |
| Coeff Var      | 27.15948 |          |        |

| Parameter Estimates |           |    |                    |                |         |         |
|---------------------|-----------|----|--------------------|----------------|---------|---------|
| Variable            | Label     | DF | Parameter Estimate | Standard Error | t Value | Pr >  t |
| Intercept           | Intercept | 1  | 9.90300            | 3.01836        | 3.28    | 0.0022  |
| SALDO               | SALDO     | 1  | 0.74052            | 0.06835        | 10.83   | <.0001  |

### EXP SIMPLES modelo reduzido

The REG Procedure  
 Model: MODEL1  
 Dependent Variable: Pred Predicted Value

#### Fit Diagnostics for Pred

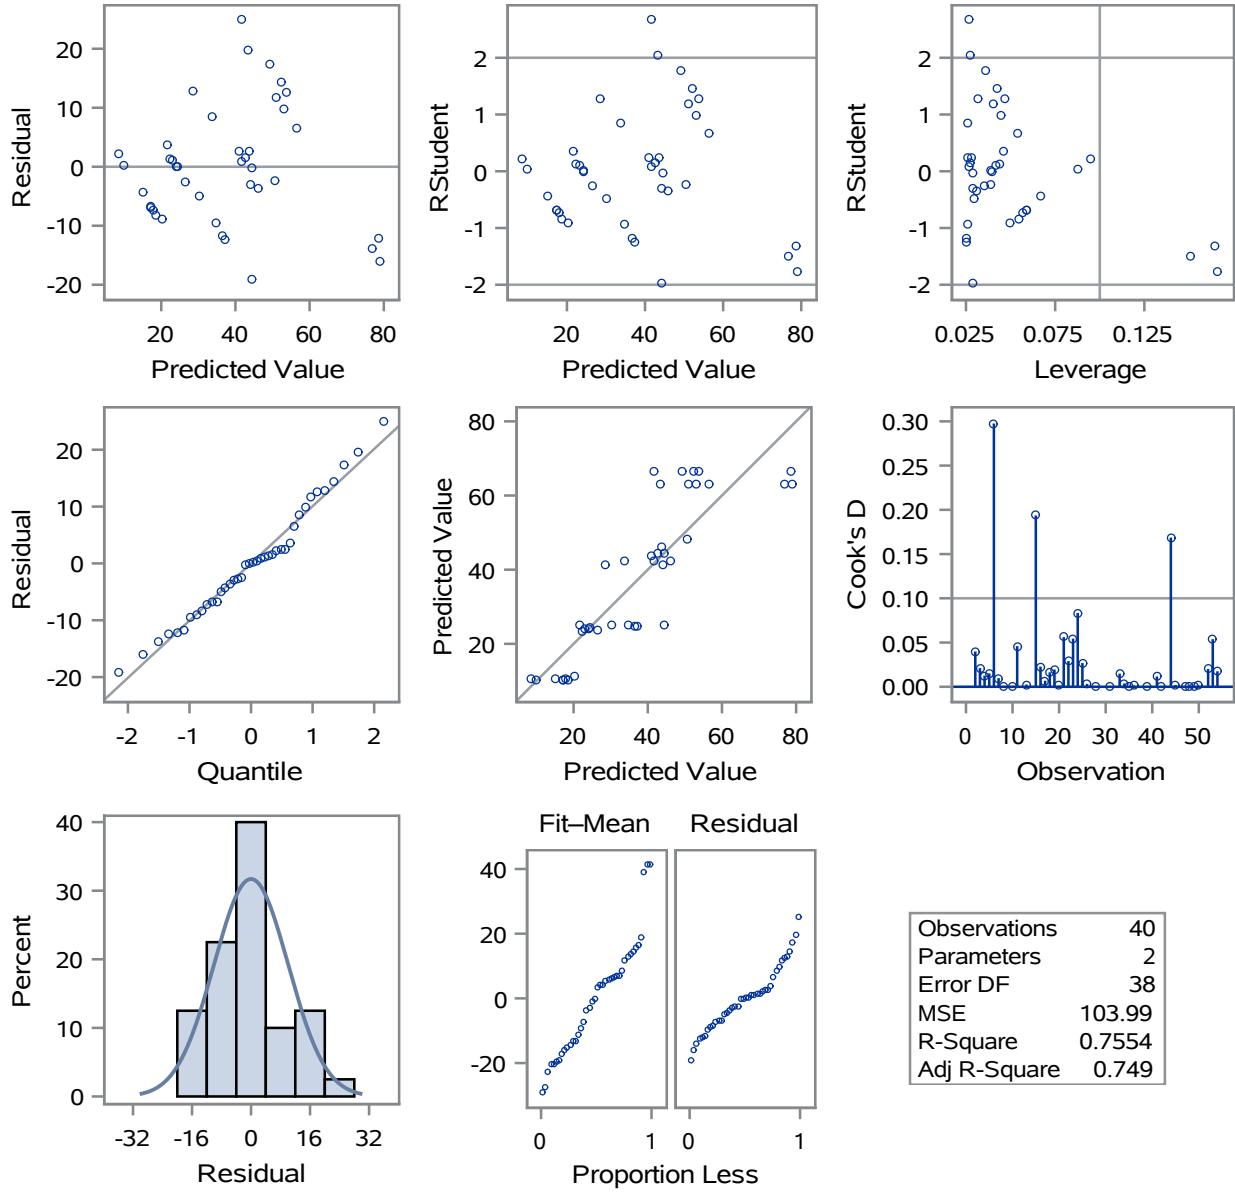

|              |        |
|--------------|--------|
| Observations | 40     |
| Parameters   | 2      |
| Error DF     | 38     |
| MSE          | 103.99 |
| R-Square     | 0.7554 |
| Adj R-Square | 0.749  |

### EXP SIMPLES modelo reduzido

The REG Procedure  
Model: MODEL1  
Dependent Variable: Pred Predicted Value

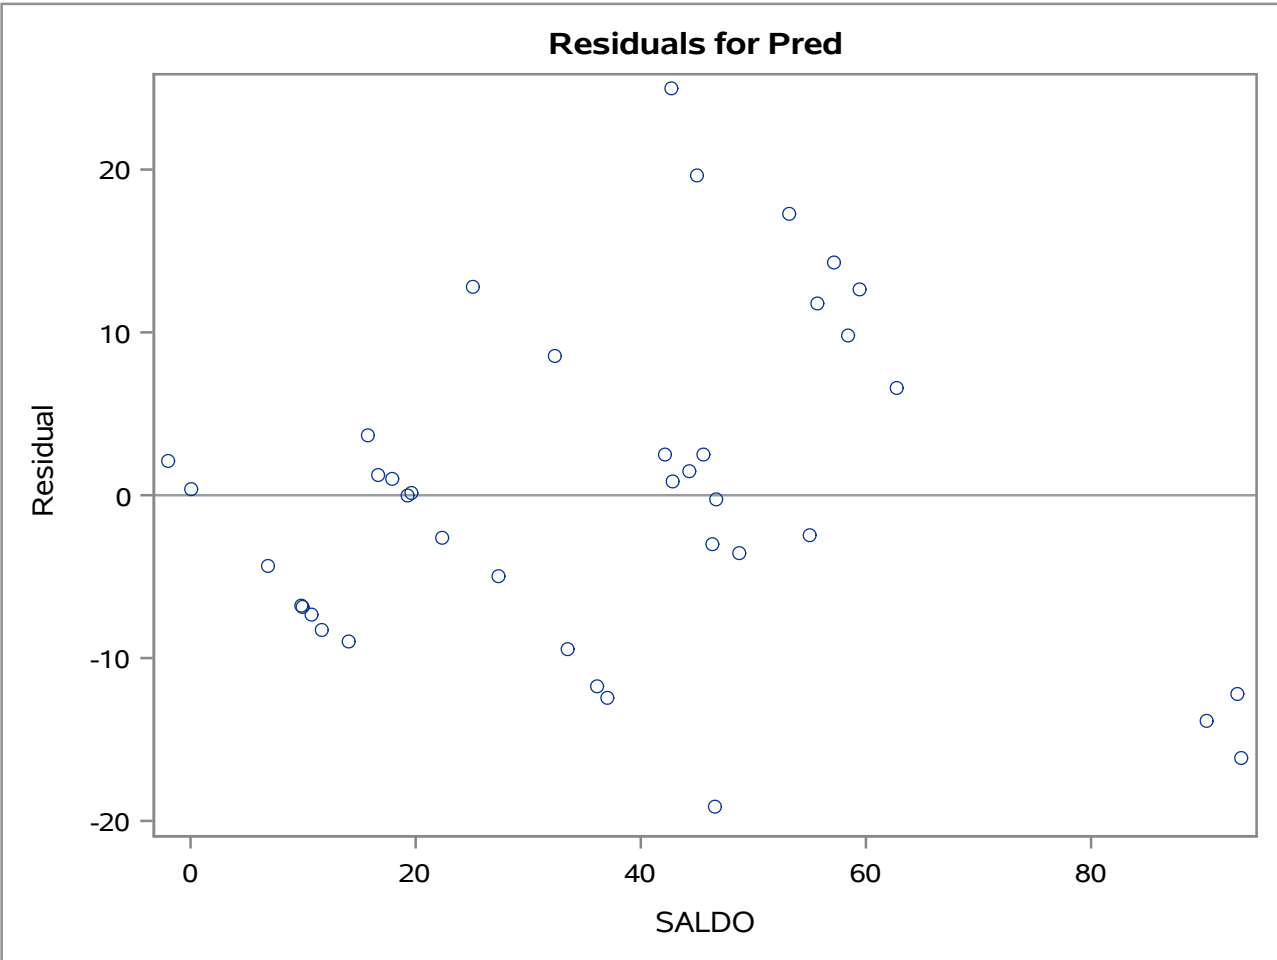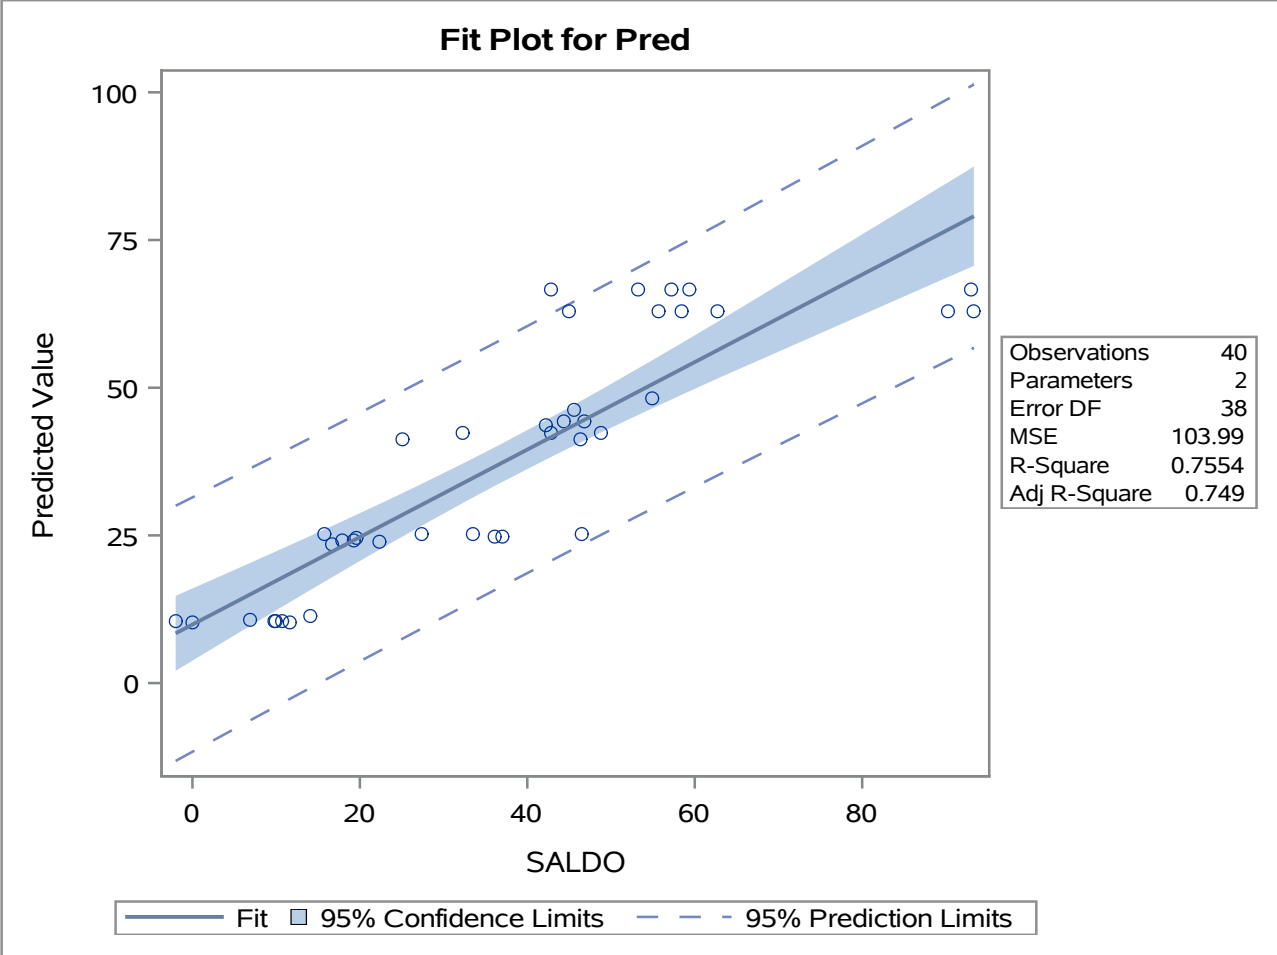

**EXP SIMPLES modelo reduzido****The MEANS Procedure**

| Analysis Variable : MSE |             |                |                |                |
|-------------------------|-------------|----------------|----------------|----------------|
| <b>N</b>                | <b>Mean</b> | <b>Std Dev</b> | <b>Minimum</b> | <b>Maximum</b> |
| 40                      | 136.3014097 | 227.3184195    | 0.0092131      | 925.5726751    |
